# Supplementary material
Source: publisher figshare collection journal article supplement (https://springernature.figshare.com/ndownloader/files/38336981)
Supplement: Supplementary file 1 [file 38336981]

## Sheet: Supplementary Data 1
TABULATION OF MAMMAL SPECIES USED IN THE PRESENT STUDY, WITH THEIR RESPECTIVE VERTEBRAL COUNTS, COMPLEXITY INDICES, AND MAJOR TAXONOMIC GROUPS															PROBABILITY DENSITY DISTRIBUTIONS OF SIX COMPLEXITY INDICES COLOUR-CODED BY MAJOR GROUP																					UNIVARIATE STATISTICS FOR THORACIC AND LUMBAR VERTEBRAL COUNTS COLOUR-CODED BY MAJOR GROUP
Species	Cervical count	Thoracic count	Lumbar count	Presacral count	Thoracolumbar count	Brillouin index - presacral count	Evenness index - presacral count	Brillouin index - thoracolumbar count	Evenness index - thoracolumbar count	Logit thoracic:lumbar ratio	Unstandardized thoracic:lumbar ratio	Group name	Group number																							CLADE		Afrotheria			Cetartiodactyla			Chiroptera			Euarchonta
Zaglossus_bruijnii	7	17	4	28	21	0.810052	0.834439	0.414143	0.680868	-3.11482	4.25	Monotremata	6
Tachyglossus_aculeatus	7	16	3	26	19	0.779728	0.809187	0.361909	0.601406	-2.87639	5.33333	Monotremata	6
Ornithorhynchus_anatinus	7	17	2	26	19	0.713012	0.739951	0.270614	0.449696	-2.37627	8.5	Monotremata	6																							N species		39			205			89			126
Solenodon_paradoxus	7	16	4	27	20	0.821573	0.848211	0.424285	0.699748	-3.17805	4	Eulipotyphla	4																							vertebral region		Thoracic	Lumbar		Thoracic	Lumbar		Thoracic	Lumbar		Thoracic	Lumbar
Solenodon_cubanus	7	15	4	26	19	0.833047	0.864521	0.434872	0.722653	-3.24519	3.75	Eulipotyphla	4																							minimum		13	2		9	3		11	3		12	3
Galemys_pyrenaicus	7	14	5	26	19	0.875301	0.908371	0.492693	0.818739	-3.54715	2.8	Eulipotyphla	4																							maximum		23	8		17	33		15	7		16	9
Scapanus_latimanus	7	14	5	26	19	0.875301	0.908371	0.492693	0.818739	-3.54715	2.8	Eulipotyphla	4																							sum		653	207		2623	1835		1069	460		1610	784
Scalopus_aquaticus	7	14	5	26	19	0.875301	0.908371	0.492693	0.818739	-3.54715	2.8	Eulipotyphla	4																							mean		16.7436	5.30769		12.7951	8.95122		12.0112	5.16854		12.7778	6.22222
Talpa_europaea	7	13	6	26	19	0.907889	0.942191	0.537288	0.892845	-3.81007	2.16667	Eulipotyphla	4																							standard error		0.459886	0.326834		0.0957483	0.361446		0.093854	0.0893112		0.0787916	0.10504
Euroscaptor_mizura	7	13	6	26	19	0.907889	0.942191	0.537288	0.892845	-3.81007	2.16667	Eulipotyphla	4																							variance		8.24831	4.16599		1.87939	26.7819		0.783963	0.709908		0.782222	1.39022
Euroscaptor_micrura	7	13	5	25	18	0.885552	0.922735	0.503099	0.839137	-3.62331	2.6	Eulipotyphla	4																							standard deviation		2.87199	2.04108		1.37091	5.17513		0.885417	0.84256		0.884433	1.17908
Mogera_tokudae	7	13	6	26	19	0.907889	0.942191	0.537288	0.892845	-3.81007	2.16667	Eulipotyphla	4																							median		17	6		13	6		12	5		13	6
Mogera_imaizumii	7	14	5	26	19	0.875301	0.908371	0.492693	0.818739	-3.54715	2.8	Eulipotyphla	4																							25 percentile		14	3		13	6		11	5		12	5
Mogera_wogura	7	14	5	26	19	0.875301	0.908371	0.492693	0.818739	-3.54715	2.8	Eulipotyphla	4																							75 percentile		19	7		13	11		13	6		13	7
Euroscaptor_subanura	7	13	6	26	19	0.907889	0.942191	0.537288	0.892845	-3.81007	2.16667	Eulipotyphla	4																							skewness		0.285429	-0.245529		-0.615959	1.90051		0.580702	-0.0974278		1.29919	-0.383022
Condylura_cristata	7	13	6	26	19	0.907889	0.942191	0.537288	0.892845	-3.81007	2.16667	Eulipotyphla	4																							kurtosis		-0.725279	-1.34083		1.04927	4.05501		0.12913	0.0248841		2.26282	-0.0296959
Hylomys_suillus	7	14	6	27	20	0.898589	0.927725	0.528257	0.871223	-3.73426	2.33333	Eulipotyphla	4
Echinosorex_gymnura	7	15	6	28	21	0.888788	0.915545	0.519125	0.853461	-3.66356	2.5	Eulipotyphla	4
Erinaceus_europaeus	7	15	6	28	21	0.888788	0.915545	0.519125	0.853461	-3.66356	2.5	Eulipotyphla	4																							HISTOGRAMS OF PERCENTAGE DISTRIBUTIONS OF THORACIC AND LUMBAR VERTEBRAL COUNTS FOR EACH MAJOR GROUP
Paraechinus_micropus	7	14	5	26	19	0.875301	0.908371	0.492693	0.818739	-3.54715	2.8	Eulipotyphla	4
Hemiechinus_auritus	7	14	5	26	19	0.875301	0.908371	0.492693	0.818739	-3.54715	2.8	Eulipotyphla	4
Atelerix_algirus	7	16	5	28	21	0.853758	0.879461	0.472418	0.776674	-3.4095	3.2	Eulipotyphla	4
Scutisorex_somereni	7	13	11	31	24	0.952019	0.971413	0.613761	0.994595	-4.42623	1.18182	Eulipotyphla	4
Suncus_madagascariensis	7	15	5	27	20	0.864652	0.892687	0.482443	0.795664	-3.4761	3	Eulipotyphla	4
Crocidura_crenata	7	13	6	26	19	0.907889	0.942191	0.537288	0.892845	-3.81007	2.16667	Eulipotyphla	4		Brillouin index of the presacral count										Evenness index of the presacral count
Crocidura_canariensis	7	14	5	26	19	0.875301	0.908371	0.492693	0.818739	-3.54715	2.8	Eulipotyphla	4
Sorex_araneus	7	14	6	27	20	0.898589	0.927725	0.528257	0.871223	-3.73426	2.33333	Eulipotyphla	4
Sorex_minutus	7	14	6	27	20	0.898589	0.927725	0.528257	0.871223	-3.73426	2.33333	Eulipotyphla	4
Cryptotis_parva	7	13	6	26	19	0.907889	0.942191	0.537288	0.892845	-3.81007	2.16667	Eulipotyphla	4
Blarina_hylophaga	7	13	7	27	20	0.924261	0.954229	0.562915	0.928382	-3.96739	1.85714	Eulipotyphla	4
Notiosorex_crawfordi	7	13	6	26	19	0.907889	0.942191	0.537288	0.892845	-3.81007	2.16667	Eulipotyphla	4
Smutsia_gigantea	7	14	5	26	19	0.875301	0.908371	0.492693	0.818739	-3.54715	2.8	Ferae	8
Phataginus_tricuspis	7	14	6	27	20	0.898589	0.927725	0.528257	0.871223	-3.73426	2.33333	Ferae	8
Manis_pentadactyla	7	16	6	29	22	0.878647	0.902089	0.510003	0.83318	-3.59731	2.66667	Ferae	8
Urocyon_cinereoargenteus	7	13	7	27	20	0.924261	0.954229	0.562915	0.928382	-3.96739	1.85714	Ferae	8
Vulpes_lagopus	7	13	7	27	20	0.924261	0.954229	0.562915	0.928382	-3.96739	1.85714	Ferae	8
Vulpes_zerda	7	13	7	27	20	0.924261	0.954229	0.562915	0.928382	-3.96739	1.85714	Ferae	8
Vulpes_vulpes	7	13	7	27	20	0.924261	0.954229	0.562915	0.928382	-3.96739	1.85714	Ferae	8
Otocyon_megalotis	7	13	7	27	20	0.924261	0.954229	0.562915	0.928382	-3.96739	1.85714	Ferae	8
Nyctereutes_procyonoides	7	13	7	27	20	0.924261	0.954229	0.562915	0.928382	-3.96739	1.85714	Ferae	8
Lycaon_pictus	7	13	7	27	20	0.924261	0.954229	0.562915	0.928382	-3.96739	1.85714	Ferae	8
Chrysocyon_brachyurus	7	13	7	27	20	0.924261	0.954229	0.562915	0.928382	-3.96739	1.85714	Ferae	8
Canis_mesomelas	7	13	7	27	20	0.924261	0.954229	0.562915	0.928382	-3.96739	1.85714	Ferae	8
Canis_simensis	7	13	7	27	20	0.924261	0.954229	0.562915	0.928382	-3.96739	1.85714	Ferae	8
Canis_latrans	7	13	7	27	20	0.924261	0.954229	0.562915	0.928382	-3.96739	1.85714	Ferae	8
Canis_aureus	7	13	7	27	20	0.924261	0.954229	0.562915	0.928382	-3.96739	1.85714	Ferae	8
Canis_lupus	7	13	7	27	20	0.924261	0.954229	0.562915	0.928382	-3.96739	1.85714	Ferae	8
Cuon_alpinus	7	13	7	27	20	0.924261	0.954229	0.562915	0.928382	-3.96739	1.85714	Ferae	8
Canis_adustus	7	13	7	27	20	0.924261	0.954229	0.562915	0.928382	-3.96739	1.85714	Ferae	8
Pseudalopex_gymnocercus	7	13	7	27	20	0.924261	0.954229	0.562915	0.928382	-3.96739	1.85714	Ferae	8
Speothos_venaticus	7	13	7	27	20	0.924261	0.954229	0.562915	0.928382	-3.96739	1.85714	Ferae	8
Cerdocyon_thous	7	13	7	27	20	0.924261	0.954229	0.562915	0.928382	-3.96739	1.85714	Ferae	8
Neomonachus_tropicalis	7	15	5	27	20	0.864652	0.892687	0.482443	0.795664	-3.4761	3	Ferae	8
Monachus_monachus	7	15	5	27	20	0.864652	0.892687	0.482443	0.795664	-3.4761	3	Ferae	8
Mirounga_leonina	7	15	5	27	20	0.864652	0.892687	0.482443	0.795664	-3.4761	3	Ferae	8
Mirounga_angustirostris	7	15	5	27	20	0.864652	0.892687	0.482443	0.795664	-3.4761	3	Ferae	8
Lobodon_carcinophaga	7	15	5	27	20	0.864652	0.892687	0.482443	0.795664	-3.4761	3	Ferae	8		Brillouin index of the thoracolumbar count										Evenness index of the thoracolumbar count
Leptonychotes_weddellii	7	15	5	27	20	0.864652	0.892687	0.482443	0.795664	-3.4761	3	Ferae	8
Ommatophoca_rossii	7	15	5	27	20	0.864652	0.892687	0.482443	0.795664	-3.4761	3	Ferae	8
Hydrurga_leptonyx	7	14	6	27	20	0.898589	0.927725	0.528257	0.871223	-3.73426	2.33333	Ferae	8
Erignathus_barbatus	7	15	5	27	20	0.864652	0.892687	0.482443	0.795664	-3.4761	3	Ferae	8
Pagophilus_groenlandicus	7	15	5	27	20	0.864652	0.892687	0.482443	0.795664	-3.4761	3	Ferae	8
Phoca_vitulina	7	15	5	27	20	0.864652	0.892687	0.482443	0.795664	-3.4761	3	Ferae	8
Pusa_hispida	7	15	5	27	20	0.864652	0.892687	0.482443	0.795664	-3.4761	3	Ferae	8
Halichoerus_grypus	7	15	5	27	20	0.864652	0.892687	0.482443	0.795664	-3.4761	3	Ferae	8
Cystophora_cristata	7	15	5	27	20	0.864652	0.892687	0.482443	0.795664	-3.4761	3	Ferae	8
Odobenus_rosmarus	7	15	5	27	20	0.864652	0.892687	0.482443	0.795664	-3.4761	3	Ferae	8
Callorhinus_ursinus	7	15	5	27	20	0.864652	0.892687	0.482443	0.795664	-3.4761	3	Ferae	8
Zalophus_californianus	7	15	5	27	20	0.864652	0.892687	0.482443	0.795664	-3.4761	3	Ferae	8
Zalophus_japonicus	7	15	5	27	20	0.864652	0.892687	0.482443	0.795664	-3.4761	3	Ferae	8
Eumetopias_jubatus	7	15	5	27	20	0.864652	0.892687	0.482443	0.795664	-3.4761	3	Ferae	8
Arctocephalus_pusillus	7	15	5	27	20	0.864652	0.892687	0.482443	0.795664	-3.4761	3	Ferae	8
Neophoca_cinerea	7	15	5	27	20	0.864652	0.892687	0.482443	0.795664	-3.4761	3	Ferae	8
Otaria_bryonia	7	15	5	27	20	0.864652	0.892687	0.482443	0.795664	-3.4761	3	Ferae	8
Arctocephalus_tropicalis	7	15	5	27	20	0.864652	0.892687	0.482443	0.795664	-3.4761	3	Ferae	8
Arctocephalus_forsteri	7	15	5	27	20	0.864652	0.892687	0.482443	0.795664	-3.4761	3	Ferae	8
Arctocephalus_australis	7	15	5	27	20	0.864652	0.892687	0.482443	0.795664	-3.4761	3	Ferae	8
Mydaus_javanensis	7	14	6	27	20	0.898589	0.927725	0.528257	0.871223	-3.73426	2.33333	Ferae	8
Spilogale_gracilis	7	14	7	28	21	0.916007	0.943584	0.555417	0.913127	-3.89182	2	Ferae	8
Mephitis_mephitis	7	16	6	29	22	0.878647	0.902089	0.510003	0.83318	-3.59731	2.66667	Ferae	8
Conepatus_humboldtii	7	16	5	28	21	0.853758	0.879461	0.472418	0.776674	-3.4095	3.2	Ferae	8
Conepatus_chinga	7	16	5	28	21	0.853758	0.879461	0.472418	0.776674	-3.4095	3.2	Ferae	8
Potos_flavus	7	14	6	27	20	0.898589	0.927725	0.528257	0.871223	-3.73426	2.33333	Ferae	8
Procyon_lotor	7	14	6	27	20	0.898589	0.927725	0.528257	0.871223	-3.73426	2.33333	Ferae	8
Procyon_cancrivorus	7	14	6	27	20	0.898589	0.927725	0.528257	0.871223	-3.73426	2.33333	Ferae	8
Bassariscus_astutus	7	13	7	27	20	0.924261	0.954229	0.562915	0.928382	-3.96739	1.85714	Ferae	8
Nasua_nasua	7	14	6	27	20	0.898589	0.927725	0.528257	0.871223	-3.73426	2.33333	Ferae	8
Nasua_narica	7	15	5	27	20	0.864652	0.892687	0.482443	0.795664	-3.4761	3	Ferae	8
Bassaricyon_alleni	7	13	7	27	20	0.924261	0.954229	0.562915	0.928382	-3.96739	1.85714	Ferae	8		Logit-transformed thoracic:lumbar ratio										Unstandardized thoracic:lumbar ratio
Taxidea_taxus	7	14	6	27	20	0.898589	0.927725	0.528257	0.871223	-3.73426	2.33333	Ferae	8
Meles_meles	7	15	5	27	20	0.864652	0.892687	0.482443	0.795664	-3.4761	3	Ferae	8
Meles_anakuma	7	15	5	27	20	0.864652	0.892687	0.482443	0.795664	-3.4761	3	Ferae	8
Arctonyx_collaris	7	16	4	27	20	0.821573	0.848211	0.424285	0.699748	-3.17805	4	Ferae	8
Mellivora_capensis	7	15	4	26	19	0.833047	0.864521	0.434872	0.722653	-3.24519	3.75	Ferae	8
Gulo_gulo	7	15	5	27	20	0.864652	0.892687	0.482443	0.795664	-3.4761	3	Ferae	8
Martes_flavigula	7	14	6	27	20	0.898589	0.927725	0.528257	0.871223	-3.73426	2.33333	Ferae	8
Martes_foina	7	14	6	27	20	0.898589	0.927725	0.528257	0.871223	-3.73426	2.33333	Ferae	8
Martes_zibellina	7	14	6	27	20	0.898589	0.927725	0.528257	0.871223	-3.73426	2.33333	Ferae	8
Martes_martes	7	14	6	27	20	0.898589	0.927725	0.528257	0.871223	-3.73426	2.33333	Ferae	8
Martes_americana	7	14	6	27	20	0.898589	0.927725	0.528257	0.871223	-3.73426	2.33333	Ferae	8
Martes_pennanti	7	14	6	27	20	0.898589	0.927725	0.528257	0.871223	-3.73426	2.33333	Ferae	8
Eira_barbara	7	14	6	27	20	0.898589	0.927725	0.528257	0.871223	-3.73426	2.33333	Ferae	8
Melogale_orientalis	7	14	6	27	20	0.898589	0.927725	0.528257	0.871223	-3.73426	2.33333	Ferae	8
Neovison_vison	7	14	6	27	20	0.898589	0.927725	0.528257	0.871223	-3.73426	2.33333	Ferae	8
Mustela_frenata	7	14	6	27	20	0.898589	0.927725	0.528257	0.871223	-3.73426	2.33333	Ferae	8
Mustela_felipei	7	14	6	27	20	0.898589	0.927725	0.528257	0.871223	-3.73426	2.33333	Ferae	8
Mustela_erminea	7	14	6	27	20	0.898589	0.927725	0.528257	0.871223	-3.73426	2.33333	Ferae	8
Mustela_nivalis	7	14	6	27	20	0.898589	0.927725	0.528257	0.871223	-3.73426	2.33333	Ferae	8
Mustela_sibirica	7	14	6	27	20	0.898589	0.927725	0.528257	0.871223	-3.73426	2.33333	Ferae	8
Mustela_nigripes	7	14	6	27	20	0.898589	0.927725	0.528257	0.871223	-3.73426	2.33333	Ferae	8
Mustela_lutreolina	7	14	6	27	20	0.898589	0.927725	0.528257	0.871223	-3.73426	2.33333	Ferae	8
Mustela_putorius	7	14	6	27	20	0.898589	0.927725	0.528257	0.871223	-3.73426	2.33333	Ferae	8
Ictonyx_libyca	7	15	5	27	20	0.864652	0.892687	0.482443	0.795664	-3.4761	3	Ferae	8
Galictis_vittata	7	16	5	28	21	0.853758	0.879461	0.472418	0.776674	-3.4095	3.2	Ferae	8
Lyncodon_patagonicus	7	16	4	27	20	0.821573	0.848211	0.424285	0.699748	-3.17805	4	Ferae	8
Galictis_cuja	7	15	5	27	20	0.864652	0.892687	0.482443	0.795664	-3.4761	3	Ferae	8
Pteronura_brasiliensis	7	15	5	27	20	0.864652	0.892687	0.482443	0.795664	-3.4761	3	Ferae	8
Lontra_longicaudis	7	15	5	27	20	0.864652	0.892687	0.482443	0.795664	-3.4761	3	Ferae	8
Lontra_provocax	7	15	5	27	20	0.864652	0.892687	0.482443	0.795664	-3.4761	3	Ferae	8
Lontra_canadensis	7	14	6	27	20	0.898589	0.927725	0.528257	0.871223	-3.73426	2.33333	Ferae	8
Enhydra_lutris	7	15	6	28	21	0.888788	0.915545	0.519125	0.853461	-3.66356	2.5	Ferae	8
Lutra_maculicollis	7	14	6	27	20	0.898589	0.927725	0.528257	0.871223	-3.73426	2.33333	Ferae	8
Lutra_lutra	7	14	6	27	20	0.898589	0.927725	0.528257	0.871223	-3.73426	2.33333	Ferae	8
Aonyx_cinerea	7	14	6	27	20	0.898589	0.927725	0.528257	0.871223	-3.73426	2.33333	Ferae	8
Lutrogale_perspicillata	7	14	6	27	20	0.898589	0.927725	0.528257	0.871223	-3.73426	2.33333	Ferae	8
Aonyx_capensis	7	14	6	27	20	0.898589	0.927725	0.528257	0.871223	-3.73426	2.33333	Ferae	8
Ailurus_fulgens	7	14	6	27	20	0.898589	0.927725	0.528257	0.871223	-3.73426	2.33333	Ferae	8
Ursus_maritimus	7	14	6	27	20	0.898589	0.927725	0.528257	0.871223	-3.73426	2.33333	Ferae	8
Ursus_arctos	7	15	4	26	19	0.833047	0.864521	0.434872	0.722653	-3.24519	3.75	Ferae	8
Melursus_ursinus	7	15	5	27	20	0.864652	0.892687	0.482443	0.795664	-3.4761	3	Ferae	8
Ursus_thibetanus	7	14	6	27	20	0.898589	0.927725	0.528257	0.871223	-3.73426	2.33333	Ferae	8
Ursus_americanus	7	14	6	27	20	0.898589	0.927725	0.528257	0.871223	-3.73426	2.33333	Ferae	8
Helarctos_malayanus	7	15	4	26	19	0.833047	0.864521	0.434872	0.722653	-3.24519	3.75	Ferae	8
Ailuropoda_melanoleuca	7	13	5	25	18	0.885552	0.922735	0.503099	0.839137	-3.62331	2.6	Ferae	8
Nandinia_binotata	7	13	7	27	20	0.924261	0.954229	0.562915	0.928382	-3.96739	1.85714	Ferae	8
Hyaena_hyaena	7	15	4	26	19	0.833047	0.864521	0.434872	0.722653	-3.24519	3.75	Ferae	8
Hyaena_brunnea	7	16	4	27	20	0.821573	0.848211	0.424285	0.699748	-3.17805	4	Ferae	8
Proteles_cristata	7	15	5	27	20	0.864652	0.892687	0.482443	0.795664	-3.4761	3	Ferae	8
Crocuta_crocuta	7	15	5	27	20	0.864652	0.892687	0.482443	0.795664	-3.4761	3	Ferae	8
Eupleres_goudotii	7	13	7	27	20	0.924261	0.954229	0.562915	0.928382	-3.96739	1.85714	Ferae	8
Salanoia_concolor	7	13	7	27	20	0.924261	0.954229	0.562915	0.928382	-3.96739	1.85714	Ferae	8
Galidictis_fasciata	7	14	6	27	20	0.898589	0.927725	0.528257	0.871223	-3.73426	2.33333	Ferae	8
Galidia_elegans	7	13	7	27	20	0.924261	0.954229	0.562915	0.928382	-3.96739	1.85714	Ferae	8
Cryptoprocta_ferox	7	13	7	27	20	0.924261	0.954229	0.562915	0.928382	-3.96739	1.85714	Ferae	8
Herpestes_vitticollis	7	13	7	27	20	0.924261	0.954229	0.562915	0.928382	-3.96739	1.85714	Ferae	8
Herpestes_javanicus	7	13	7	27	20	0.924261	0.954229	0.562915	0.928382	-3.96739	1.85714	Ferae	8
Herpestes_edwardsii	7	13	7	27	20	0.924261	0.954229	0.562915	0.928382	-3.96739	1.85714	Ferae	8
Herpestes_ichneumon	7	13	7	27	20	0.924261	0.954229	0.562915	0.928382	-3.96739	1.85714	Ferae	8
Ichneumia_albicauda	7	13	7	27	20	0.924261	0.954229	0.562915	0.928382	-3.96739	1.85714	Ferae	8
Cynictis_penicillata	7	13	7	27	20	0.924261	0.954229	0.562915	0.928382	-3.96739	1.85714	Ferae	8
Bdeogale_crassicauda	7	14	6	27	20	0.898589	0.927725	0.528257	0.871223	-3.73426	2.33333	Ferae	8
Crossarchus_obscurus	7	14	6	27	20	0.898589	0.927725	0.528257	0.871223	-3.73426	2.33333	Ferae	8
Helogale_parvula	7	13	7	27	20	0.924261	0.954229	0.562915	0.928382	-3.96739	1.85714	Ferae	8
Liberiictis_kuhni	7	13	7	27	20	0.924261	0.954229	0.562915	0.928382	-3.96739	1.85714	Ferae	8
Mungos_mungo	7	14	6	27	20	0.898589	0.927725	0.528257	0.871223	-3.73426	2.33333	Ferae	8
Suricata_suricatta	7	14	6	27	20	0.898589	0.927725	0.528257	0.871223	-3.73426	2.33333	Ferae	8
Genetta_maculata	7	13	7	27	20	0.924261	0.954229	0.562915	0.928382	-3.96739	1.85714	Ferae	8
Genetta_tigrina	7	13	7	27	20	0.924261	0.954229	0.562915	0.928382	-3.96739	1.85714	Ferae	8
Genetta_genetta	7	13	7	27	20	0.924261	0.954229	0.562915	0.928382	-3.96739	1.85714	Ferae	8
Genetta_servalina	7	13	7	27	20	0.924261	0.954229	0.562915	0.928382	-3.96739	1.85714	Ferae	8
Viverricula_indica	7	13	7	27	20	0.924261	0.954229	0.562915	0.928382	-3.96739	1.85714	Ferae	8
Viverra_tangalunga	7	13	7	27	20	0.924261	0.954229	0.562915	0.928382	-3.96739	1.85714	Ferae	8
Viverra_zibetha	7	13	7	27	20	0.924261	0.954229	0.562915	0.928382	-3.96739	1.85714	Ferae	8
Civettictis_civetta	7	14	6	27	20	0.898589	0.927725	0.528257	0.871223	-3.73426	2.33333	Ferae	8
Macrogalidia_musschenbroekii	7	12	7	26	19	0.931699	0.9669	0.569869	0.946987	-4.04888	1.71429	Ferae	8
Cynogale_bennettii	7	14	6	27	20	0.898589	0.927725	0.528257	0.871223	-3.73426	2.33333	Ferae	8
Hemigalus_derbyanus	7	13	7	27	20	0.924261	0.954229	0.562915	0.928382	-3.96739	1.85714	Ferae	8
Paradoxurus_hermaphroditus	7	13	7	27	20	0.924261	0.954229	0.562915	0.928382	-3.96739	1.85714	Ferae	8
Arctictis_binturong	7	13	7	27	20	0.924261	0.954229	0.562915	0.928382	-3.96739	1.85714	Ferae	8
Prionodon_pardicolor	7	12	7	26	19	0.931699	0.9669	0.569869	0.946987	-4.04888	1.71429	Ferae	8
Prionodon_linsang	7	12	7	26	19	0.931699	0.9669	0.569869	0.946987	-4.04888	1.71429	Ferae	8
Neofelis_nebulosa	7	13	7	27	20	0.924261	0.954229	0.562915	0.928382	-3.96739	1.85714	Ferae	8
Panthera_tigris	7	13	7	27	20	0.924261	0.954229	0.562915	0.928382	-3.96739	1.85714	Ferae	8
Panthera_onca	7	13	7	27	20	0.924261	0.954229	0.562915	0.928382	-3.96739	1.85714	Ferae	8
Panthera_uncia	7	13	7	27	20	0.924261	0.954229	0.562915	0.928382	-3.96739	1.85714	Ferae	8
Panthera_pardus	7	13	7	27	20	0.924261	0.954229	0.562915	0.928382	-3.96739	1.85714	Ferae	8
Panthera_leo	7	13	7	27	20	0.924261	0.954229	0.562915	0.928382	-3.96739	1.85714	Ferae	8
Lynx_rufus	7	13	7	27	20	0.924261	0.954229	0.562915	0.928382	-3.96739	1.85714	Ferae	8
Lynx_lynx	7	13	7	27	20	0.924261	0.954229	0.562915	0.928382	-3.96739	1.85714	Ferae	8
Lynx_canadensis	7	13	7	27	20	0.924261	0.954229	0.562915	0.928382	-3.96739	1.85714	Ferae	8
Acinonyx_jubatus	7	13	7	27	20	0.924261	0.954229	0.562915	0.928382	-3.96739	1.85714	Ferae	8
Puma_concolor	7	13	7	27	20	0.924261	0.954229	0.562915	0.928382	-3.96739	1.85714	Ferae	8
Felis_catus	7	13	7	27	20	0.924261	0.954229	0.562915	0.928382	-3.96739	1.85714	Ferae	8
Felis_silvestris	7	13	7	27	20	0.924261	0.954229	0.562915	0.928382	-3.96739	1.85714	Ferae	8
Leopardus_pardalis	7	13	7	27	20	0.924261	0.954229	0.562915	0.928382	-3.96739	1.85714	Ferae	8
Leopardus_wiedii	7	13	7	27	20	0.924261	0.954229	0.562915	0.928382	-3.96739	1.85714	Ferae	8
Leopardus_tigrinus	7	13	7	27	20	0.924261	0.954229	0.562915	0.928382	-3.96739	1.85714	Ferae	8
Prionailurus_bengalensis	7	13	7	27	20	0.924261	0.954229	0.562915	0.928382	-3.96739	1.85714	Ferae	8
Leptailurus_serval	7	13	7	27	20	0.924261	0.954229	0.562915	0.928382	-3.96739	1.85714	Ferae	8
Caracal_caracal	7	13	7	27	20	0.924261	0.954229	0.562915	0.928382	-3.96739	1.85714	Ferae	8
Equus_africanus	7	18	5	30	23	0.831671	0.850235	0.453206	0.738374	-3.28757	3.6	Perissodactyla	7
Equus_grevyi	7	18	6	31	24	0.857818	0.875293	0.492085	0.79742	-3.4761	3	Perissodactyla	7
Equus_quagga	7	18	6	31	24	0.857818	0.875293	0.492085	0.79742	-3.4761	3	Perissodactyla	7
Equus_zebra	7	18	6	31	24	0.857818	0.875293	0.492085	0.79742	-3.4761	3	Perissodactyla	7
Equus_hemionus	7	18	6	31	24	0.857818	0.875293	0.492085	0.79742	-3.4761	3	Perissodactyla	7
Equus_caballus	7	19	5	31	24	0.820635	0.837353	0.444056	0.719591	-3.23143	3.8	Perissodactyla	7
Equus_ferus	7	18	6	31	24	0.857818	0.875293	0.492085	0.79742	-3.4761	3	Perissodactyla	7
Tapirus_indicus	7	18	5	30	23	0.831671	0.850235	0.453206	0.738374	-3.28757	3.6	Perissodactyla	7
Tapirus_terrestris	7	18	5	30	23	0.831671	0.850235	0.453206	0.738374	-3.28757	3.6	Perissodactyla	7
Tapirus_bairdii	7	18	5	30	23	0.831671	0.850235	0.453206	0.738374	-3.28757	3.6	Perissodactyla	7
Rhinoceros_unicornis	7	19	3	29	22	0.744836	0.764708	0.333615	0.545019	-2.69392	6.33333	Perissodactyla	7
Rhinoceros_sondaicus	7	19	3	29	22	0.744836	0.764708	0.333615	0.545019	-2.69392	6.33333	Perissodactyla	7
Dicerorhinus_sumatrensis	7	19	3	29	22	0.744836	0.764708	0.333615	0.545019	-2.69392	6.33333	Perissodactyla	7
Diceros_bicornis	7	20	3	30	23	0.733523	0.749896	0.325187	0.529802	-2.63906	6.66667	Perissodactyla	7
Ceratotherium_simum	7	19	3	29	22	0.744836	0.764708	0.333615	0.545019	-2.69392	6.33333	Perissodactyla	7
Vicugna_pacos	7	12	7	26	19	0.931699	0.9669	0.569869	0.946987	-4.04888	1.71429	Cetartiodactyla	2
Vicugna_vicugna	7	12	7	26	19	0.931699	0.9669	0.569869	0.946987	-4.04888	1.71429	Cetartiodactyla	2
Lama_glama	7	12	7	26	19	0.931699	0.9669	0.569869	0.946987	-4.04888	1.71429	Cetartiodactyla	2
Camelus_dromedarius	7	11	6	24	17	0.924084	0.965482	0.554324	0.933147	-3.98053	1.83333	Cetartiodactyla	2
Camelus_ferus	7	12	7	26	19	0.931699	0.9669	0.569869	0.946987	-4.04888	1.71429	Cetartiodactyla	2
Tayassu_pecari	7	14	6	27	20	0.898589	0.927725	0.528257	0.871223	-3.73426	2.33333	Cetartiodactyla	2
Pecari_tajacu	7	14	5	26	19	0.875301	0.908371	0.492693	0.818739	-3.54715	2.8	Cetartiodactyla	2
Sus_scrofa	7	13	6	26	19	0.907889	0.942191	0.537288	0.892845	-3.81007	2.16667	Cetartiodactyla	2
Sus_barbatus	7	13	4	24	17	0.85539	0.89371	0.457344	0.769891	-3.39348	3.25	Cetartiodactyla	2
Potamochoerus_porcus	7	14	5	26	19	0.875301	0.908371	0.492693	0.818739	-3.54715	2.8	Cetartiodactyla	2
Phacochoerus_africanus	7	13	6	26	19	0.907889	0.942191	0.537288	0.892845	-3.81007	2.16667	Cetartiodactyla	2
Phacochoerus_aethiopicus	7	13	5	25	18	0.885552	0.922735	0.503099	0.839137	-3.62331	2.6	Cetartiodactyla	2
Hylochoerus_meinertzhageni	7	14	5	26	19	0.875301	0.908371	0.492693	0.818739	-3.54715	2.8	Cetartiodactyla	2
Babyrousa_babyrussa	7	13	6	26	19	0.907889	0.942191	0.537288	0.892845	-3.81007	2.16667	Cetartiodactyla	2
Hippopotamus_amphibius	7	15	4	26	19	0.833047	0.864521	0.434872	0.722653	-3.24519	3.75	Cetartiodactyla	2
Choeropsis_liberiensis	7	15	4	26	19	0.833047	0.864521	0.434872	0.722653	-3.24519	3.75	Cetartiodactyla	2
Indopacetus_pacificus	7	10	12	29	22	0.909729	0.915884	0.57975	0.925478	-5.24175	0.526316	Cetartiodactyla	2
Kogia_sima	7	13	10	30	23	0.949217	0.970404	0.606526	0.988167	-4.32972	1.3	Cetartiodactyla	2
Kogia_breviceps	7	12	9	28	21	0.949126	0.977701	0.599576	0.985726	-4.30406	1.33333	Cetartiodactyla	2
Physeter_macrocephalus	7	11	8	26	19	0.947293	0.983084	0.591209	0.982449	-4.27287	1.375	Cetartiodactyla	2
Platanista_gangetica	7	10	8	25	18	0.950777	0.990699	0.593691	0.990237	-4.36945	1.25	Cetartiodactyla	2
Pontoporia_blainvillei	7	10	6	23	16	0.930341	0.978308	0.561762	0.94986	-4.07754	1.66667	Cetartiodactyla	2
Inia_geoffrensis	7	13	3	23	16	0.814678	0.856681	0.395496	0.668728	-3.09453	4.33333	Cetartiodactyla	2
Inia_araguaiaensis	7	11	3	21	14	0.836234	0.886706	0.421225	0.724386	-3.26853	3.66667	Cetartiodactyla	2
Lipotes_vexillifer	7	10	7	24	17	0.942916	0.985158	0.580912	0.977904	-4.23411	1.42857	Cetartiodactyla	2
Delphinapterus_leucas	7	11	9	27	20	0.952898	0.983794	0.601574	0.99214	-4.3922	1.22222	Cetartiodactyla	2
Mesoplodon_bowdoini	7	10	10	27	20	0.956428	0.987439	0.60634	1	-4.59512	1	Cetartiodactyla	2
Monodon_monoceros	7	11	9	27	20	0.952898	0.983794	0.601574	0.99214	-4.3922	1.22222	Cetartiodactyla	2
Neophocaena_phocaenoides	7	13	11	31	24	0.952019	0.971413	0.613761	0.994595	-4.42623	1.18182	Cetartiodactyla	2
Phocoenoides_dalli	7	17	25	49	42	0.908814	0.895709	0.625314	0.972293	-4.98401	0.68	Cetartiodactyla	2
Phocoena_phocoena	7	13	14	34	27	0.950361	0.96199	0.622746	1	-4.66995	0.928571	Cetartiodactyla	2
Phocoena_spinipinnis	7	14	15	36	29	0.947334	0.953744	0.626433	1	-4.66479	0.933333	Cetartiodactyla	2
Phocoena_dioptrica	7	14	14	35	28	0.949388	0.958716	0.625261	1	-4.59512	1	Cetartiodactyla	2
Lagenorhynchus_acutus	7	15	19	41	34	0.933412	0.93115	0.627696	0.989383	-4.83363	0.789474	Cetartiodactyla	2
Lagenorhynchus_albirostris	7	15	23	45	38	0.913174	0.904608	0.617428	0.965985	-5.02607	0.652174	Cetartiodactyla	2
Orcinus_orca	7	12	9	28	21	0.949126	0.977701	0.599576	0.985726	-4.30406	1.33333	Cetartiodactyla	2
Orcaella_brevirostris	7	13	14	34	27	0.950361	0.96199	0.622746	1	-4.66995	0.928571	Cetartiodactyla	2
Grampus_griseus	7	13	17	37	30	0.939141	0.944142	0.620033	0.986283	-4.86576	0.764706	Cetartiodactyla	2
Pseudorca_crassidens	7	10	10	27	20	0.956428	0.987439	0.60634	1	-4.59512	1	Cetartiodactyla	2
Peponocephala_electra	7	14	15	36	29	0.947334	0.953744	0.626433	1	-4.66479	0.933333	Cetartiodactyla	2
Globicephala_melas	7	11	14	32	25	0.948102	0.964715	0.612403	0.990032	-4.83844	0.785714	Cetartiodactyla	2
Globicephala_macrorhynchus	7	11	12	30	23	0.954785	0.976097	0.613789	1	-4.68297	0.916667	Cetartiodactyla	2
Feresa_attenuata	7	12	16	35	28	0.941484	0.950735	0.615381	0.984199	-4.88532	0.75	Cetartiodactyla	2
Steno_bredanensis	7	12	15	34	27	0.946152	0.95773	0.617446	0.991489	-4.82028	0.8	Cetartiodactyla	2
Sotalia_guianensis	7	12	12	31	24	0.954601	0.974048	0.617096	1	-4.59512	1	Cetartiodactyla	2
Sotalia_fluviatilis	7	12	12	31	24	0.954601	0.974048	0.617096	1	-4.59512	1	Cetartiodactyla	2
Tursiops_truncatus	7	13	14	34	27	0.950361	0.96199	0.622746	1	-4.66995	0.928571	Cetartiodactyla	2
Stenella_attenuata	7	15	21	43	36	0.923919	0.918549	0.623341	0.978694	-4.93447	0.714286	Cetartiodactyla	2
Lagenodelphis_hosei	7	14	23	44	37	0.908959	0.902244	0.608992	0.954967	-5.0955	0.608696	Cetartiodactyla	2
Stenella_longirostris	7	15	19	41	34	0.933412	0.93115	0.627696	0.989383	-4.83363	0.789474	Cetartiodactyla	2
Sousa_chinensis	7	12	9	28	21	0.949126	0.977701	0.599576	0.985726	-4.30406	1.33333	Cetartiodactyla	2
Tursiops_aduncus	7	13	14	34	27	0.950361	0.96199	0.622746	1	-4.66995	0.928571	Cetartiodactyla	2
Stenella_frontalis	7	14	16	37	30	0.944388	0.949417	0.626505	0.996578	-4.72991	0.875	Cetartiodactyla	2
Stenella_coeruleoalba	7	15	19	41	34	0.933412	0.93115	0.627696	0.989383	-4.83363	0.789474	Cetartiodactyla	2
Stenella_clymene	7	15	17	39	32	0.941083	0.941681	0.6298	0.997001	-4.72147	0.882353	Cetartiodactyla	2
Delphinus_delphis	7	14	21	42	35	0.920842	0.916516	0.616138	0.96983	-5.00395	0.666667	Cetartiodactyla	2
Delphinus_capensis	7	14	20	41	34	0.926395	0.92415	0.619235	0.976047	-4.95482	0.7	Cetartiodactyla	2
Lagenorhynchus_obscurus	7	13	22	42	35	0.91008	0.905805	0.603224	0.949503	-5.12534	0.590909	Cetartiodactyla	2
Lagenorhynchus_obliquidens	7	14	22	43	36	0.915012	0.909694	0.612703	0.96199	-5.05077	0.636364	Cetartiodactyla	2
Lagenorhynchus_cruciger	7	13	22	42	35	0.91008	0.905805	0.603224	0.949503	-5.12534	0.590909	Cetartiodactyla	2
Lagenorhynchus_australis	7	13	14	34	27	0.950361	0.96199	0.622746	1	-4.66995	0.928571	Cetartiodactyla	2
Cephalorhynchus_hectori	7	12	17	36	29	0.936173	0.942508	0.612578	0.977883	-4.94639	0.705882	Cetartiodactyla	2
Cephalorhynchus_heavisidii	7	13	19	39	32	0.928578	0.929167	0.61456	0.972874	-4.97779	0.684211	Cetartiodactyla	2
Cephalorhynchus_eutropia	7	13	16	36	29	0.943625	0.95001	0.621828	0.99265	-4.80465	0.8125	Cetartiodactyla	2
Cephalorhynchus_commersonii	7	13	15	35	28	0.947416	0.956726	0.622797	0.996059	-4.73957	0.866667	Cetartiodactyla	2
Berardius_bairdii	7	11	13	31	24	0.952019	0.971413	0.613761	0.994595	-4.76373	0.846154	Cetartiodactyla	2
Berardius_arnuxii	7	10	12	29	22	0.953112	0.978541	0.608162	0.993539	-4.77912	0.833333	Cetartiodactyla	2
Mesoplodon_bidens	7	10	10	27	20	0.956428	0.987439	0.60634	1	-4.59512	1	Cetartiodactyla	2
Ziphius_cavirostris	7	10	10	27	20	0.956428	0.987439	0.60634	1	-4.59512	1	Cetartiodactyla	2
Mesoplodon_stejnegeri	7	9	11	27	20	0.952898	0.983794	0.601574	0.99214	-4.79763	0.818182	Cetartiodactyla	2
Hyperoodon_planifrons	7	9	10	26	19	0.955012	0.991093	0.601771	1	-4.70149	0.9	Cetartiodactyla	2
Hyperoodon_ampullatus	7	9	10	26	19	0.955012	0.991093	0.601771	1	-4.70149	0.9	Cetartiodactyla	2
Mesoplodon_hectori	7	11	10	28	21	0.955638	0.984408	0.608258	1	-4.4988	1.1	Cetartiodactyla	2
Mesoplodon_carlhubbsi	7	10	11	28	21	0.955638	0.984408	0.608258	1	-4.69135	0.909091	Cetartiodactyla	2
Mesoplodon_layardii	7	10	10	27	20	0.956428	0.987439	0.60634	1	-4.59512	1	Cetartiodactyla	2
Mesoplodon_mirus	7	10	10	27	20	0.956428	0.987439	0.60634	1	-4.59512	1	Cetartiodactyla	2
Mesoplodon_europaeus	7	10	10	27	20	0.956428	0.987439	0.60634	1	-4.59512	1	Cetartiodactyla	2
Mesoplodon_densirostris	7	10	10	27	20	0.956428	0.987439	0.60634	1	-4.59512	1	Cetartiodactyla	2
Mesoplodon_grayi	7	10	11	28	21	0.955638	0.984408	0.608258	1	-4.69135	0.909091	Cetartiodactyla	2
Tasmacetus_shepherdi	7	10	10	27	20	0.956428	0.987439	0.60634	1	-4.59512	1	Cetartiodactyla	2
Eubalaena_glacialis	7	14	12	33	26	0.950026	0.963233	0.618587	0.995413	-4.43928	1.16667	Cetartiodactyla	2
Eubalaena_japonica	7	14	11	32	25	0.948102	0.964715	0.612403	0.990032	-4.3512	1.27273	Cetartiodactyla	2
Balaenoptera_physalus	7	15	14	36	29	0.947334	0.953744	0.626433	1	-4.52541	1.07143	Cetartiodactyla	2
Balaenoptera_musculus	7	14	16	37	30	0.944388	0.949417	0.626505	0.996578	-4.72991	0.875	Cetartiodactyla	2
Balaenoptera_omurai	7	13	12	32	25	0.952919	0.969617	0.618569	1	-4.51424	1.08333	Cetartiodactyla	2
Balaenoptera_borealis	7	13	14	34	27	0.950361	0.96199	0.622746	1	-4.66995	0.928571	Cetartiodactyla	2
Balaenoptera_edeni	7	13	13	33	26	0.952272	0.96551	0.621437	1	-4.59512	1	Cetartiodactyla	2
Mesoplodon_perrini	7	10	11	28	21	0.955638	0.984408	0.608258	1	-4.69135	0.909091	Cetartiodactyla	2
Balaenoptera_bonaerensis	7	11	12	30	23	0.954785	0.976097	0.613789	1	-4.68297	0.916667	Cetartiodactyla	2
Mesoplodon_peruvianus	7	10	10	27	20	0.956428	0.987439	0.60634	1	-4.59512	1	Cetartiodactyla	2
Lissodelphis_peronii	7	14	32	53	46	0.850128	0.833842	0.569639	0.881105	-5.42746	0.4375	Cetartiodactyla	2
Lissodelphis_borealis	7	15	33	55	48	0.851792	0.833653	0.577504	0.891196	-5.38907	0.454545	Cetartiodactyla	2
Balaena_mysticetus	7	12	10	29	22	0.953112	0.978541	0.608162	0.993539	-4.41078	1.2	Cetartiodactyla	2
Caperea_marginata	7	17	3	27	20	0.767983	0.792884	0.351939	0.580433	-2.81223	5.66667	Cetartiodactyla	2
Balaenoptera_acutorostrata	7	11	12	30	23	0.954785	0.976097	0.613789	1	-4.68297	0.916667	Cetartiodactyla	2
Mesoplodon_ginkgodens	7	10	11	28	21	0.955638	0.984408	0.608258	1	-4.69135	0.909091	Cetartiodactyla	2
Megaptera_novaeangliae	7	14	11	32	25	0.948102	0.964715	0.612403	0.990032	-4.3512	1.27273	Cetartiodactyla	2
Eschrichtius_robustus	7	14	12	33	26	0.950026	0.963233	0.618587	0.995413	-4.43928	1.16667	Cetartiodactyla	2
Moschiola_meminna	7	13	6	26	19	0.907889	0.942191	0.537288	0.892845	-3.81007	2.16667	Cetartiodactyla	2
Moschiola_indica	7	13	6	26	19	0.907889	0.942191	0.537288	0.892845	-3.81007	2.16667	Cetartiodactyla	2
Tragulus_javanicus	7	13	6	26	19	0.907889	0.942191	0.537288	0.892845	-3.81007	2.16667	Cetartiodactyla	2
Tragulus_kanchil	7	13	6	26	19	0.907889	0.942191	0.537288	0.892845	-3.81007	2.16667	Cetartiodactyla	2
Tragulus_napu	7	13	6	26	19	0.907889	0.942191	0.537288	0.892845	-3.81007	2.16667	Cetartiodactyla	2
Okapia_johnstoni	7	14	5	26	19	0.875301	0.908371	0.492693	0.818739	-3.54715	2.8	Cetartiodactyla	2
Giraffa_camelopardalis	7	14	5	26	19	0.875301	0.908371	0.492693	0.818739	-3.54715	2.8	Cetartiodactyla	2
Antilocapra_americana	7	13	6	26	19	0.907889	0.942191	0.537288	0.892845	-3.81007	2.16667	Cetartiodactyla	2
Muntiacus_muntjak	7	13	6	26	19	0.907889	0.942191	0.537288	0.892845	-3.81007	2.16667	Cetartiodactyla	2
Dama_dama	7	13	6	26	19	0.907889	0.942191	0.537288	0.892845	-3.81007	2.16667	Cetartiodactyla	2
Elaphurus_davidianus	7	13	6	26	19	0.907889	0.942191	0.537288	0.892845	-3.81007	2.16667	Cetartiodactyla	2
Rusa_unicolor	7	13	6	26	19	0.907889	0.942191	0.537288	0.892845	-3.81007	2.16667	Cetartiodactyla	2
Cervus_elaphus	7	13	6	26	19	0.907889	0.942191	0.537288	0.892845	-3.81007	2.16667	Cetartiodactyla	2
Axis_calamianensis	7	13	6	26	19	0.907889	0.942191	0.537288	0.892845	-3.81007	2.16667	Cetartiodactyla	2
Axis_axis	7	13	6	26	19	0.907889	0.942191	0.537288	0.892845	-3.81007	2.16667	Cetartiodactyla	2
Rangifer_tarandus	7	14	5	26	19	0.875301	0.908371	0.492693	0.818739	-3.54715	2.8	Cetartiodactyla	2
Odocoileus_virginianus	7	13	6	26	19	0.907889	0.942191	0.537288	0.892845	-3.81007	2.16667	Cetartiodactyla	2
Odocoileus_hemionus	7	13	6	26	19	0.907889	0.942191	0.537288	0.892845	-3.81007	2.16667	Cetartiodactyla	2
Mazama_gouazoubira	7	13	6	26	19	0.907889	0.942191	0.537288	0.892845	-3.81007	2.16667	Cetartiodactyla	2
Blastocerus_dichotomus	7	12	6	25	18	0.916479	0.954961	0.546054	0.910783	-3.89182	2	Cetartiodactyla	2
Pudu_puda	7	13	6	26	19	0.907889	0.942191	0.537288	0.892845	-3.81007	2.16667	Cetartiodactyla	2
Hydropotes_inermis	7	12	6	25	18	0.916479	0.954961	0.546054	0.910783	-3.89182	2	Cetartiodactyla	2
Capreolus_capreolus	7	13	6	26	19	0.907889	0.942191	0.537288	0.892845	-3.81007	2.16667	Cetartiodactyla	2
Alces_alces	7	13	6	26	19	0.907889	0.942191	0.537288	0.892845	-3.81007	2.16667	Cetartiodactyla	2
Moschus_moschiferus	7	14	5	26	19	0.875301	0.908371	0.492693	0.818739	-3.54715	2.8	Cetartiodactyla	2
Moschus_berezovskii	7	13	6	26	19	0.907889	0.942191	0.537288	0.892845	-3.81007	2.16667	Cetartiodactyla	2
Boselaphus_tragocamelus	7	13	6	26	19	0.907889	0.942191	0.537288	0.892845	-3.81007	2.16667	Cetartiodactyla	2
Tetracerus_quadricornis	7	13	6	26	19	0.907889	0.942191	0.537288	0.892845	-3.81007	2.16667	Cetartiodactyla	2
Tragelaphus_imberbis	7	13	6	26	19	0.907889	0.942191	0.537288	0.892845	-3.81007	2.16667	Cetartiodactyla	2
Tragelaphus_angasii	7	13	6	26	19	0.907889	0.942191	0.537288	0.892845	-3.81007	2.16667	Cetartiodactyla	2
Tragelaphus_scriptus	7	13	6	26	19	0.907889	0.942191	0.537288	0.892845	-3.81007	2.16667	Cetartiodactyla	2
Tragelaphus_eurycerus	7	13	6	26	19	0.907889	0.942191	0.537288	0.892845	-3.81007	2.16667	Cetartiodactyla	2
Tragelaphus_spekii	7	13	6	26	19	0.907889	0.942191	0.537288	0.892845	-3.81007	2.16667	Cetartiodactyla	2
Tragelaphus_buxtoni	7	13	6	26	19	0.907889	0.942191	0.537288	0.892845	-3.81007	2.16667	Cetartiodactyla	2
Tragelaphus_strepsiceros	7	13	6	26	19	0.907889	0.942191	0.537288	0.892845	-3.81007	2.16667	Cetartiodactyla	2
Syncerus_caffer	7	13	6	26	19	0.907889	0.942191	0.537288	0.892845	-3.81007	2.16667	Cetartiodactyla	2
Bubalus_mindorensis	7	13	6	26	19	0.907889	0.942191	0.537288	0.892845	-3.81007	2.16667	Cetartiodactyla	2
Bubalus_depressicornis	7	13	7	27	20	0.924261	0.954229	0.562915	0.928382	-3.96739	1.85714	Cetartiodactyla	2
Bubalus_arnee	7	13	6	26	19	0.907889	0.942191	0.537288	0.892845	-3.81007	2.16667	Cetartiodactyla	2
Bos_gaurus	7	13	6	26	19	0.907889	0.942191	0.537288	0.892845	-3.81007	2.16667	Cetartiodactyla	2
Bos_taurus	7	13	6	26	19	0.907889	0.942191	0.537288	0.892845	-3.81007	2.16667	Cetartiodactyla	2
Bos_indicus	7	13	6	26	19	0.907889	0.942191	0.537288	0.892845	-3.81007	2.16667	Cetartiodactyla	2
Bison_bonasus	7	14	5	26	19	0.875301	0.908371	0.492693	0.818739	-3.54715	2.8	Cetartiodactyla	2
Bos_mutus	7	14	5	26	19	0.875301	0.908371	0.492693	0.818739	-3.54715	2.8	Cetartiodactyla	2
Bos_grunniens	7	14	5	26	19	0.875301	0.908371	0.492693	0.818739	-3.54715	2.8	Cetartiodactyla	2
Bison_bison	7	14	5	26	19	0.875301	0.908371	0.492693	0.818739	-3.54715	2.8	Cetartiodactyla	2
Nesotragus_moschatus	7	13	6	26	19	0.907889	0.942191	0.537288	0.892845	-3.81007	2.16667	Cetartiodactyla	2
Aepyceros_melampus	7	13	6	26	19	0.907889	0.942191	0.537288	0.892845	-3.81007	2.16667	Cetartiodactyla	2
Pelea_capreolus	7	13	6	26	19	0.907889	0.942191	0.537288	0.892845	-3.81007	2.16667	Cetartiodactyla	2
Redunca_fulvorufula	7	13	6	26	19	0.907889	0.942191	0.537288	0.892845	-3.81007	2.16667	Cetartiodactyla	2
Redunca_redunca	7	13	6	26	19	0.907889	0.942191	0.537288	0.892845	-3.81007	2.16667	Cetartiodactyla	2
Redunca_arundinum	7	13	6	26	19	0.907889	0.942191	0.537288	0.892845	-3.81007	2.16667	Cetartiodactyla	2
Kobus_megaceros	7	13	6	26	19	0.907889	0.942191	0.537288	0.892845	-3.81007	2.16667	Cetartiodactyla	2
Kobus_leche	7	13	6	26	19	0.907889	0.942191	0.537288	0.892845	-3.81007	2.16667	Cetartiodactyla	2
Kobus_vardonii	7	13	6	26	19	0.907889	0.942191	0.537288	0.892845	-3.81007	2.16667	Cetartiodactyla	2
Kobus_kob	7	13	6	26	19	0.907889	0.942191	0.537288	0.892845	-3.81007	2.16667	Cetartiodactyla	2
Kobus_ellipsiprymnus	7	13	6	26	19	0.907889	0.942191	0.537288	0.892845	-3.81007	2.16667	Cetartiodactyla	2
Ourebia_ourebi	7	13	6	26	19	0.907889	0.942191	0.537288	0.892845	-3.81007	2.16667	Cetartiodactyla	2
Raphicerus_melanotis	7	13	6	26	19	0.907889	0.942191	0.537288	0.892845	-3.81007	2.16667	Cetartiodactyla	2
Raphicerus_sharpei	7	13	6	26	19	0.907889	0.942191	0.537288	0.892845	-3.81007	2.16667	Cetartiodactyla	2
Raphicerus_campestris	7	13	6	26	19	0.907889	0.942191	0.537288	0.892845	-3.81007	2.16667	Cetartiodactyla	2
Madoqua_kirkii	7	13	6	26	19	0.907889	0.942191	0.537288	0.892845	-3.81007	2.16667	Cetartiodactyla	2
Madoqua_guentheri	7	13	6	26	19	0.907889	0.942191	0.537288	0.892845	-3.81007	2.16667	Cetartiodactyla	2
Saiga_tatarica	7	12	7	26	19	0.931699	0.9669	0.569869	0.946987	-4.04888	1.71429	Cetartiodactyla	2
Nanger_granti	7	13	6	26	19	0.907889	0.942191	0.537288	0.892845	-3.81007	2.16667	Cetartiodactyla	2
Eudorcas_rufifrons	7	13	6	26	19	0.907889	0.942191	0.537288	0.892845	-3.81007	2.16667	Cetartiodactyla	2
Gazella_dorcas	7	13	6	26	19	0.907889	0.942191	0.537288	0.892845	-3.81007	2.16667	Cetartiodactyla	2
Gazella_gazella	7	13	6	26	19	0.907889	0.942191	0.537288	0.892845	-3.81007	2.16667	Cetartiodactyla	2
Gazella_spekei	7	13	6	26	19	0.907889	0.942191	0.537288	0.892845	-3.81007	2.16667	Cetartiodactyla	2
Antilope_cervicapra	7	13	6	26	19	0.907889	0.942191	0.537288	0.892845	-3.81007	2.16667	Cetartiodactyla	2
Litocranius_walleri	7	13	6	26	19	0.907889	0.942191	0.537288	0.892845	-3.81007	2.16667	Cetartiodactyla	2
Antidorcas_marsupialis	7	13	6	26	19	0.907889	0.942191	0.537288	0.892845	-3.81007	2.16667	Cetartiodactyla	2
Neotragus_pygmaeus	7	15	7	29	22	0.907153	0.931356	0.547579	0.894567	-3.82137	2.14286	Cetartiodactyla	2
Oreotragus_oreotragus	7	13	6	26	19	0.907889	0.942191	0.537288	0.892845	-3.81007	2.16667	Cetartiodactyla	2
Philantomba_monticola	7	14	5	26	19	0.875301	0.908371	0.492693	0.818739	-3.54715	2.8	Cetartiodactyla	2
Sylvicapra_grimmia	7	14	5	26	19	0.875301	0.908371	0.492693	0.818739	-3.54715	2.8	Cetartiodactyla	2
Cephalophus_silvicultor	7	14	5	26	19	0.875301	0.908371	0.492693	0.818739	-3.54715	2.8	Cetartiodactyla	2
Cephalophus_dorsalis	7	14	5	26	19	0.875301	0.908371	0.492693	0.818739	-3.54715	2.8	Cetartiodactyla	2
Cephalophus_leucogaster	7	14	5	26	19	0.875301	0.908371	0.492693	0.818739	-3.54715	2.8	Cetartiodactyla	2
Cephalophus_nigrifrons	7	14	5	26	19	0.875301	0.908371	0.492693	0.818739	-3.54715	2.8	Cetartiodactyla	2
Cephalophus_natalensis	7	14	5	26	19	0.875301	0.908371	0.492693	0.818739	-3.54715	2.8	Cetartiodactyla	2
Cephalophus_weynsi	7	14	5	26	19	0.875301	0.908371	0.492693	0.818739	-3.54715	2.8	Cetartiodactyla	2
Ovibos_moschatus	7	13	6	26	19	0.907889	0.942191	0.537288	0.892845	-3.81007	2.16667	Cetartiodactyla	2
Capricornis_crispus	7	13	6	26	19	0.907889	0.942191	0.537288	0.892845	-3.81007	2.16667	Cetartiodactyla	2
Ovis_canadensis	7	13	6	26	19	0.907889	0.942191	0.537288	0.892845	-3.81007	2.16667	Cetartiodactyla	2
Ovis_orientalis	7	13	6	26	19	0.907889	0.942191	0.537288	0.892845	-3.81007	2.16667	Cetartiodactyla	2
Ovis_aries	7	13	7	27	20	0.924261	0.954229	0.562915	0.928382	-3.96739	1.85714	Cetartiodactyla	2
Ovis_ammon	7	13	6	26	19	0.907889	0.942191	0.537288	0.892845	-3.81007	2.16667	Cetartiodactyla	2
Capra_ibex	7	13	6	26	19	0.907889	0.942191	0.537288	0.892845	-3.81007	2.16667	Cetartiodactyla	2
Capra_hircus	7	13	6	26	19	0.907889	0.942191	0.537288	0.892845	-3.81007	2.16667	Cetartiodactyla	2
Pseudois_nayaur	7	13	6	26	19	0.907889	0.942191	0.537288	0.892845	-3.81007	2.16667	Cetartiodactyla	2
Myotragus_balearicus	7	12	6	25	18	0.916479	0.954961	0.546054	0.910783	-3.89182	2	Cetartiodactyla	2
Oreamnos_americanus	7	13	6	26	19	0.907889	0.942191	0.537288	0.892845	-3.81007	2.16667	Cetartiodactyla	2
Rupicapra_rupicapra	7	13	6	26	19	0.907889	0.942191	0.537288	0.892845	-3.81007	2.16667	Cetartiodactyla	2
Ammotragus_lervia	7	13	6	26	19	0.907889	0.942191	0.537288	0.892845	-3.81007	2.16667	Cetartiodactyla	2
Connochaetes_taurinus	7	13	6	26	19	0.907889	0.942191	0.537288	0.892845	-3.81007	2.16667	Cetartiodactyla	2
Connochaetes_gnou	7	14	6	27	20	0.898589	0.927725	0.528257	0.871223	-3.73426	2.33333	Cetartiodactyla	2
Damaliscus_pygargus	7	13	6	26	19	0.907889	0.942191	0.537288	0.892845	-3.81007	2.16667	Cetartiodactyla	2
Damaliscus_lunatus	7	13	6	26	19	0.907889	0.942191	0.537288	0.892845	-3.81007	2.16667	Cetartiodactyla	2
Beatragus_hunteri	7	13	6	26	19	0.907889	0.942191	0.537288	0.892845	-3.81007	2.16667	Cetartiodactyla	2
Alcelaphus_buselaphus	7	13	6	26	19	0.907889	0.942191	0.537288	0.892845	-3.81007	2.16667	Cetartiodactyla	2
Hippotragus_niger	7	13	6	26	19	0.907889	0.942191	0.537288	0.892845	-3.81007	2.16667	Cetartiodactyla	2
Hippotragus_equinus	7	14	6	27	20	0.898589	0.927725	0.528257	0.871223	-3.73426	2.33333	Cetartiodactyla	2
Oryx_dammah	7	13	6	26	19	0.907889	0.942191	0.537288	0.892845	-3.81007	2.16667	Cetartiodactyla	2
Oryx_leucoryx	7	13	6	26	19	0.907889	0.942191	0.537288	0.892845	-3.81007	2.16667	Cetartiodactyla	2
Oryx_gazella	7	13	6	26	19	0.907889	0.942191	0.537288	0.892845	-3.81007	2.16667	Cetartiodactyla	2
Oryx_beisa	7	13	6	26	19	0.907889	0.942191	0.537288	0.892845	-3.81007	2.16667	Cetartiodactyla	2
Rhinopoma_hardwickii	7	12	4	23	16	0.865924	0.910569	0.469162	0.793286	-3.4761	3	Chiroptera	3
Rhinopoma_microphyllum	7	12	6	25	18	0.916479	0.954961	0.546054	0.910783	-3.89182	2	Chiroptera	3
Lavia_frons	7	12	4	23	16	0.865924	0.910569	0.469162	0.793286	-3.4761	3	Chiroptera	3
Megaderma_spasma	7	13	4	24	17	0.85539	0.89371	0.457344	0.769891	-3.39348	3.25	Chiroptera	3
Rhinolophus_hipposideros	7	12	6	25	18	0.916479	0.954961	0.546054	0.910783	-3.89182	2	Chiroptera	3
Asellia_tridens	7	11	7	25	18	0.938039	0.977426	0.575999	0.960728	-4.13735	1.57143	Chiroptera	3
Hipposideros_caffer	7	12	6	25	18	0.916479	0.954961	0.546054	0.910783	-3.89182	2	Chiroptera	3
Hipposideros_diadema	7	11	7	25	18	0.938039	0.977426	0.575999	0.960728	-4.13735	1.57143	Chiroptera	3
Cynopterus_titthaecheilus	7	14	5	26	19	0.875301	0.908371	0.492693	0.818739	-3.54715	2.8	Chiroptera	3
Cynopterus_brachyotis	7	14	4	25	18	0.844367	0.879821	0.445898	0.743729	-3.31678	3.5	Chiroptera	3
Epomops_franqueti	7	13	5	25	18	0.885552	0.922735	0.503099	0.839137	-3.62331	2.6	Chiroptera	3
Hypsignathus_monstrosus	7	15	3	25	18	0.791497	0.824731	0.372468	0.621251	-2.94444	5	Chiroptera	3
Rousettus_aegyptiacus	7	13	5	25	18	0.885552	0.922735	0.503099	0.839137	-3.62331	2.6	Chiroptera	3
Eidolon_helvum	7	13	3	23	16	0.814678	0.856681	0.395496	0.668728	-3.09453	4.33333	Chiroptera	3
Pteropus_giganteus	7	13	5	25	18	0.885552	0.922735	0.503099	0.839137	-3.62331	2.6	Chiroptera	3
Pteropus_rufus	7	12	5	24	17	0.895203	0.935307	0.513551	0.864509	-3.70541	2.4	Chiroptera	3
Pteropus_vampyrus	7	13	5	25	18	0.885552	0.922735	0.503099	0.839137	-3.62331	2.6	Chiroptera	3
Macroglossus_minimus	7	13	4	24	17	0.85539	0.89371	0.457344	0.769891	-3.39348	3.25	Chiroptera	3
Myzopoda_aurita	7	13	5	25	18	0.885552	0.922735	0.503099	0.839137	-3.62331	2.6	Chiroptera	3
Mystacina_tuberculata	7	13	5	25	18	0.885552	0.922735	0.503099	0.839137	-3.62331	2.6	Chiroptera	3
Thyroptera_discifera	7	12	5	24	17	0.895203	0.935307	0.513551	0.864509	-3.70541	2.4	Chiroptera	3
Noctilio_leporinus	7	11	6	24	17	0.924084	0.965482	0.554324	0.933147	-3.98053	1.83333	Chiroptera	3
Pteronotus_parnellii	7	13	5	25	18	0.885552	0.922735	0.503099	0.839137	-3.62331	2.6	Chiroptera	3
Mormoops_megalophylla	7	13	6	26	19	0.907889	0.942191	0.537288	0.892845	-3.81007	2.16667	Chiroptera	3
Micronycteris_microtis	7	13	5	25	18	0.885552	0.922735	0.503099	0.839137	-3.62331	2.6	Chiroptera	3
Anoura_caudifer	7	13	4	24	17	0.85539	0.89371	0.457344	0.769891	-3.39348	3.25	Chiroptera	3
Glossophaga_soricina	7	12	5	24	17	0.895203	0.935307	0.513551	0.864509	-3.70541	2.4	Chiroptera	3
Glossophaga_morenoi	7	12	5	24	17	0.895203	0.935307	0.513551	0.864509	-3.70541	2.4	Chiroptera	3
Phylloderma_stenops	7	13	5	25	18	0.885552	0.922735	0.503099	0.839137	-3.62331	2.6	Chiroptera	3
Phyllostomus_discolor	7	12	6	25	18	0.916479	0.954961	0.546054	0.910783	-3.89182	2	Chiroptera	3
Lonchorhina_inusitata	7	12	6	25	18	0.916479	0.954961	0.546054	0.910783	-3.89182	2	Chiroptera	3
Chrotopterus_auritus	7	12	6	25	18	0.916479	0.954961	0.546054	0.910783	-3.89182	2	Chiroptera	3
Vampyrum_spectrum	7	12	6	25	18	0.916479	0.954961	0.546054	0.910783	-3.89182	2	Chiroptera	3
Lonchophylla_inexpectata	7	12	4	23	16	0.865924	0.910569	0.469162	0.793286	-3.4761	3	Chiroptera	3
Carollia_perspicillata	7	12	5	24	17	0.895203	0.935307	0.513551	0.864509	-3.70541	2.4	Chiroptera	3
Artibeus_jamaicensis	7	13	5	25	18	0.885552	0.922735	0.503099	0.839137	-3.62331	2.6	Chiroptera	3
Artibeus_planirostris	7	12	4	23	16	0.865924	0.910569	0.469162	0.793286	-3.4761	3	Chiroptera	3
Pygoderma_bilabiatum	7	12	5	24	17	0.895203	0.935307	0.513551	0.864509	-3.70541	2.4	Chiroptera	3
Vampyressa_pusilla	7	13	4	24	17	0.85539	0.89371	0.457344	0.769891	-3.39348	3.25	Chiroptera	3
Sturnira_erythromos	7	12	4	23	16	0.865924	0.910569	0.469162	0.793286	-3.4761	3	Chiroptera	3
Sturnira_aratathomasi	7	12	5	24	17	0.895203	0.935307	0.513551	0.864509	-3.70541	2.4	Chiroptera	3
Rhinophylla_pumilio	7	11	4	22	15	0.875712	0.92551	0.481261	0.823183	-3.56568	2.75	Chiroptera	3
Lonchorhina_orinocensis	7	12	6	25	18	0.916479	0.954961	0.546054	0.910783	-3.89182	2	Chiroptera	3
Lonchorhina_fernandezi	7	12	6	25	18	0.916479	0.954961	0.546054	0.910783	-3.89182	2	Chiroptera	3
Lonchorhina_marinkellei	7	12	6	25	18	0.916479	0.954961	0.546054	0.910783	-3.89182	2	Chiroptera	3
Lonchorhina_aurita	7	12	6	25	18	0.916479	0.954961	0.546054	0.910783	-3.89182	2	Chiroptera	3
Diphylla_ecaudata	7	12	5	24	17	0.895203	0.935307	0.513551	0.864509	-3.70541	2.4	Chiroptera	3
Desmodus_rotundus	7	12	5	24	17	0.895203	0.935307	0.513551	0.864509	-3.70541	2.4	Chiroptera	3
Diaemus_youngi	7	11	6	24	17	0.924084	0.965482	0.554324	0.933147	-3.98053	1.83333	Chiroptera	3
Macrotus_waterhousii	7	12	6	25	18	0.916479	0.954961	0.546054	0.910783	-3.89182	2	Chiroptera	3
Macrotus_californicus	7	12	6	25	18	0.916479	0.954961	0.546054	0.910783	-3.89182	2	Chiroptera	3
Nyctinomops_macrotis	7	13	6	26	19	0.907889	0.942191	0.537288	0.892845	-3.81007	2.16667	Chiroptera	3
Molossus_molossus	7	11	6	24	17	0.924084	0.965482	0.554324	0.933147	-3.98053	1.83333	Chiroptera	3
Promops_nasutus	7	13	6	26	19	0.907889	0.942191	0.537288	0.892845	-3.81007	2.16667	Chiroptera	3
Molossops_temminckii	7	13	6	26	19	0.907889	0.942191	0.537288	0.892845	-3.81007	2.16667	Chiroptera	3
Cynomops_planirostris	7	13	5	25	18	0.885552	0.922735	0.503099	0.839137	-3.62331	2.6	Chiroptera	3
Eumops_perotis	7	13	6	26	19	0.907889	0.942191	0.537288	0.892845	-3.81007	2.16667	Chiroptera	3
Tadarida_brasiliensis	7	13	6	26	19	0.907889	0.942191	0.537288	0.892845	-3.81007	2.16667	Chiroptera	3
Molossus_currentium	7	11	6	24	17	0.924084	0.965482	0.554324	0.933147	-3.98053	1.83333	Chiroptera	3
Myotis_daubentonii	7	11	5	23	16	0.903988	0.950595	0.523879	0.885804	-3.79447	2.2	Chiroptera	3
Myotis_keaysi	7	11	5	23	16	0.903988	0.950595	0.523879	0.885804	-3.79447	2.2	Chiroptera	3
Myotis_velifer	7	11	5	23	16	0.903988	0.950595	0.523879	0.885804	-3.79447	2.2	Chiroptera	3
Myotis_chiloensis	7	11	5	23	16	0.903988	0.950595	0.523879	0.885804	-3.79447	2.2	Chiroptera	3
Myotis_lucifugus	7	11	4	22	15	0.875712	0.92551	0.481261	0.823183	-3.56568	2.75	Chiroptera	3
Myotis_evotis	7	11	5	23	16	0.903988	0.950595	0.523879	0.885804	-3.79447	2.2	Chiroptera	3
Eptesicus_nilssonii	7	11	5	23	16	0.903988	0.950595	0.523879	0.885804	-3.79447	2.2	Chiroptera	3
Eptesicus_serotinus	7	11	5	23	16	0.903988	0.950595	0.523879	0.885804	-3.79447	2.2	Chiroptera	3
Histiotus_montanus	7	11	5	23	16	0.903988	0.950595	0.523879	0.885804	-3.79447	2.2	Chiroptera	3
Histiotus_magellanicus	7	12	4	23	16	0.865924	0.910569	0.469162	0.793286	-3.4761	3	Chiroptera	3
Eptesicus_diminutus	7	11	5	23	16	0.903988	0.950595	0.523879	0.885804	-3.79447	2.2	Chiroptera	3
Lasionycteris_noctivagans	7	11	5	23	16	0.903988	0.950595	0.523879	0.885804	-3.79447	2.2	Chiroptera	3
Pipistrellus_pipistrellus	7	12	4	23	16	0.865924	0.910569	0.469162	0.793286	-3.4761	3	Chiroptera	3
Nyctalus_noctula	7	11	5	23	16	0.903988	0.950595	0.523879	0.885804	-3.79447	2.2	Chiroptera	3
Vespertilio_murinus	7	12	7	26	19	0.931699	0.9669	0.569869	0.946987	-4.04888	1.71429	Chiroptera	3
Chalinolobus_tuberculatus	7	11	5	23	16	0.903988	0.950595	0.523879	0.885804	-3.79447	2.2	Chiroptera	3
Neoromicia_nana	7	11	5	23	16	0.903988	0.950595	0.523879	0.885804	-3.79447	2.2	Chiroptera	3
Lasiurus_cinereus	7	11	5	23	16	0.903988	0.950595	0.523879	0.885804	-3.79447	2.2	Chiroptera	3
Lasiurus_ega	7	11	5	23	16	0.903988	0.950595	0.523879	0.885804	-3.79447	2.2	Chiroptera	3
Antrozous_pallidus	7	11	5	23	16	0.903988	0.950595	0.523879	0.885804	-3.79447	2.2	Chiroptera	3
Otonycteris_hemprichii	7	11	6	24	17	0.924084	0.965482	0.554324	0.933147	-3.98053	1.83333	Chiroptera	3
Plecotus_auritus	7	11	5	23	16	0.903988	0.950595	0.523879	0.885804	-3.79447	2.2	Chiroptera	3
Euderma_maculatum	7	11	5	23	16	0.903988	0.950595	0.523879	0.885804	-3.79447	2.2	Chiroptera	3
Barbastella_barbastellus	7	11	5	23	16	0.903988	0.950595	0.523879	0.885804	-3.79447	2.2	Chiroptera	3
Miniopterus_schreibersii	7	12	5	24	17	0.895203	0.935307	0.513551	0.864509	-3.70541	2.4	Chiroptera	3
Nycteris_javanica	7	12	5	24	17	0.895203	0.935307	0.513551	0.864509	-3.70541	2.4	Chiroptera	3
Nycteris_thebaica	7	11	4	22	15	0.875712	0.92551	0.481261	0.823183	-3.56568	2.75	Chiroptera	3
Saccopteryx_bilineata	7	12	6	25	18	0.916479	0.954961	0.546054	0.910783	-3.89182	2	Chiroptera	3
Peropteryx_leucoptera	7	13	6	26	19	0.907889	0.942191	0.537288	0.892845	-3.81007	2.16667	Chiroptera	3
Balantiopteryx_plicata	7	12	7	26	19	0.931699	0.9669	0.569869	0.946987	-4.04888	1.71429	Chiroptera	3
Galeopterus_variegatus	7	13	6	26	19	0.907889	0.942191	0.537288	0.892845	-3.81007	2.16667	Euarchonta	9
Cynocephalus_volans	7	13	6	26	19	0.907889	0.942191	0.537288	0.892845	-3.81007	2.16667	Euarchonta	9
Nycticebus_coucang	7	16	7	30	23	0.897868	0.91791	0.53955	0.879048	-3.75537	2.28571	Euarchonta	9
Loris_tardigradus	7	16	8	31	24	0.9126	0.931191	0.562844	0.912086	-3.89182	2	Euarchonta	9
Otolemur_garnettii	7	14	6	27	20	0.898589	0.927725	0.528257	0.871223	-3.73426	2.33333	Euarchonta	9
Otolemur_crassicaudatus	7	13	7	27	20	0.924261	0.954229	0.562915	0.928382	-3.96739	1.85714	Euarchonta	9
Galago_senegalensis	7	13	6	26	19	0.907889	0.942191	0.537288	0.892845	-3.81007	2.16667	Euarchonta	9
Euoticus_elegantulus	7	13	6	26	19	0.907889	0.942191	0.537288	0.892845	-3.81007	2.16667	Euarchonta	9
Perodicticus_potto	7	16	6	29	22	0.878647	0.902089	0.510003	0.83318	-3.59731	2.66667	Euarchonta	9
Arctocebus_calabarensis	7	14	7	28	21	0.916007	0.943584	0.555417	0.913127	-3.89182	2	Euarchonta	9
Daubentonia_madagascariensis	7	13	6	26	19	0.907889	0.942191	0.537288	0.892845	-3.81007	2.16667	Euarchonta	9
Indri_indri	7	12	9	28	21	0.949126	0.977701	0.599576	0.985726	-4.30406	1.33333	Euarchonta	9
Propithecus_diadema	7	12	8	27	20	0.942243	0.972794	0.58719	0.968418	-4.18459	1.5	Euarchonta	9
Propithecus_verreauxi	7	12	8	27	20	0.942243	0.972794	0.58719	0.968418	-4.18459	1.5	Euarchonta	9
Propithecus_coquereli	7	12	8	27	20	0.942243	0.972794	0.58719	0.968418	-4.18459	1.5	Euarchonta	9
Avahi_laniger	7	12	9	28	21	0.949126	0.977701	0.599576	0.985726	-4.30406	1.33333	Euarchonta	9
Varecia_variegata	7	12	7	26	19	0.931699	0.9669	0.569869	0.946987	-4.04888	1.71429	Euarchonta	9
Lemur_catta	7	12	7	26	19	0.931699	0.9669	0.569869	0.946987	-4.04888	1.71429	Euarchonta	9
Hapalemur_griseus	7	12	7	26	19	0.931699	0.9669	0.569869	0.946987	-4.04888	1.71429	Euarchonta	9
Eulemur_macaco	7	12	7	26	19	0.931699	0.9669	0.569869	0.946987	-4.04888	1.71429	Euarchonta	9
Eulemur_rubriventer	7	12	7	26	19	0.931699	0.9669	0.569869	0.946987	-4.04888	1.71429	Euarchonta	9
Eulemur_mongoz	7	12	7	26	19	0.931699	0.9669	0.569869	0.946987	-4.04888	1.71429	Euarchonta	9
Eulemur_collaris	7	12	7	26	19	0.931699	0.9669	0.569869	0.946987	-4.04888	1.71429	Euarchonta	9
Eulemur_fulvus	7	12	7	26	19	0.931699	0.9669	0.569869	0.946987	-4.04888	1.71429	Euarchonta	9
Eulemur_sanfordi	7	12	7	26	19	0.931699	0.9669	0.569869	0.946987	-4.04888	1.71429	Euarchonta	9
Eulemur_albifrons	7	12	7	26	19	0.931699	0.9669	0.569869	0.946987	-4.04888	1.71429	Euarchonta	9
Lepilemur_mustelinus	7	12	9	28	21	0.949126	0.977701	0.599576	0.985726	-4.30406	1.33333	Euarchonta	9
Cheirogaleus_medius	7	14	6	27	20	0.898589	0.927725	0.528257	0.871223	-3.73426	2.33333	Euarchonta	9
Microcebus_murinus	7	13	7	27	20	0.924261	0.954229	0.562915	0.928382	-3.96739	1.85714	Euarchonta	9
Microcebus_rufus	7	13	7	27	20	0.924261	0.954229	0.562915	0.928382	-3.96739	1.85714	Euarchonta	9
Tarsius_syrichta	7	13	6	26	19	0.907889	0.942191	0.537288	0.892845	-3.81007	2.16667	Euarchonta	9
Pithecia_irrorata	7	13	6	26	19	0.907889	0.942191	0.537288	0.892845	-3.81007	2.16667	Euarchonta	9
Pithecia_monachus	7	13	6	26	19	0.907889	0.942191	0.537288	0.892845	-3.81007	2.16667	Euarchonta	9
Pithecia_pithecia	7	13	6	26	19	0.907889	0.942191	0.537288	0.892845	-3.81007	2.16667	Euarchonta	9
Cacajao_melanocephalus	7	13	6	26	19	0.907889	0.942191	0.537288	0.892845	-3.81007	2.16667	Euarchonta	9
Callicebus_moloch	7	13	6	26	19	0.907889	0.942191	0.537288	0.892845	-3.81007	2.16667	Euarchonta	9
Leontocebus_nigricollis	7	12	7	26	19	0.931699	0.9669	0.569869	0.946987	-4.04888	1.71429	Euarchonta	9
Saguinus_oedipus	7	12	7	26	19	0.931699	0.9669	0.569869	0.946987	-4.04888	1.71429	Euarchonta	9
Leontopithecus_rosalia	7	12	7	26	19	0.931699	0.9669	0.569869	0.946987	-4.04888	1.71429	Euarchonta	9
Mico_humeralifer	7	12	7	26	19	0.931699	0.9669	0.569869	0.946987	-4.04888	1.71429	Euarchonta	9
Callithrix_jacchus	7	13	6	26	19	0.907889	0.942191	0.537288	0.892845	-3.81007	2.16667	Euarchonta	9
Cebuella_pygmaea	7	13	6	26	19	0.907889	0.942191	0.537288	0.892845	-3.81007	2.16667	Euarchonta	9
Saimiri_sciureus	7	13	7	27	20	0.924261	0.954229	0.562915	0.928382	-3.96739	1.85714	Euarchonta	9
Cebus_olivaceus	7	14	5	26	19	0.875301	0.908371	0.492693	0.818739	-3.54715	2.8	Euarchonta	9
Cebus_albifrons	7	14	6	27	20	0.898589	0.927725	0.528257	0.871223	-3.73426	2.33333	Euarchonta	9
Cebus_capucinus	7	13	6	26	19	0.907889	0.942191	0.537288	0.892845	-3.81007	2.16667	Euarchonta	9
Aotus_azarae	7	14	8	29	22	0.928829	0.953611	0.576153	0.941246	-4.0279	1.75	Euarchonta	9
Aotus_nancymaae	7	14	8	29	22	0.928829	0.953611	0.576153	0.941246	-4.0279	1.75	Euarchonta	9
Alouatta_seniculus	7	14	5	26	19	0.875301	0.908371	0.492693	0.818739	-3.54715	2.8	Euarchonta	9
Alouatta_caraya	7	14	5	26	19	0.875301	0.908371	0.492693	0.818739	-3.54715	2.8	Euarchonta	9
Alouatta_palliata	7	14	5	26	19	0.875301	0.908371	0.492693	0.818739	-3.54715	2.8	Euarchonta	9
Alouatta_pigra	7	14	5	26	19	0.875301	0.908371	0.492693	0.818739	-3.54715	2.8	Euarchonta	9
Lagothrix_lagotricha	7	14	4	25	18	0.844367	0.879821	0.445898	0.743729	-3.31678	3.5	Euarchonta	9
Brachyteles_hypoxanthus	7	13	5	25	18	0.885552	0.922735	0.503099	0.839137	-3.62331	2.6	Euarchonta	9
Brachyteles_arachnoides	7	14	4	25	18	0.844367	0.879821	0.445898	0.743729	-3.31678	3.5	Euarchonta	9
Ateles_geoffroyi	7	14	4	25	18	0.844367	0.879821	0.445898	0.743729	-3.31678	3.5	Euarchonta	9
Ateles_fusciceps	7	14	4	25	18	0.844367	0.879821	0.445898	0.743729	-3.31678	3.5	Euarchonta	9
Ateles_paniscus	7	13	4	24	17	0.85539	0.89371	0.457344	0.769891	-3.39348	3.25	Euarchonta	9
Ateles_chamek	7	14	4	25	18	0.844367	0.879821	0.445898	0.743729	-3.31678	3.5	Euarchonta	9
Ateles_belzebuth	7	14	4	25	18	0.844367	0.879821	0.445898	0.743729	-3.31678	3.5	Euarchonta	9
Symphalangus_syndactylus	7	13	5	25	18	0.885552	0.922735	0.503099	0.839137	-3.62331	2.6	Euarchonta	9
Hylobates_pileatus	7	12	5	24	17	0.895203	0.935307	0.513551	0.864509	-3.70541	2.4	Euarchonta	9
Hylobates_lar	7	13	5	25	18	0.885552	0.922735	0.503099	0.839137	-3.62331	2.6	Euarchonta	9
Hylobates_muelleri	7	13	5	25	18	0.885552	0.922735	0.503099	0.839137	-3.62331	2.6	Euarchonta	9
Hylobates_moloch	7	13	5	25	18	0.885552	0.922735	0.503099	0.839137	-3.62331	2.6	Euarchonta	9
Hylobates_klossii	7	13	5	25	18	0.885552	0.922735	0.503099	0.839137	-3.62331	2.6	Euarchonta	9
Hylobates_agilis	7	13	5	25	18	0.885552	0.922735	0.503099	0.839137	-3.62331	2.6	Euarchonta	9
Nomascus_concolor	7	13	5	25	18	0.885552	0.922735	0.503099	0.839137	-3.62331	2.6	Euarchonta	9
Nomascus_gabriellae	7	14	5	26	19	0.875301	0.908371	0.492693	0.818739	-3.54715	2.8	Euarchonta	9
Nomascus_leucogenys	7	14	5	26	19	0.875301	0.908371	0.492693	0.818739	-3.54715	2.8	Euarchonta	9
Hoolock_hoolock	7	13	5	25	18	0.885552	0.922735	0.503099	0.839137	-3.62331	2.6	Euarchonta	9
Pongo_pygmaeus	7	12	4	23	16	0.865924	0.910569	0.469162	0.793286	-3.4761	3	Euarchonta	9
Pongo_abelii	7	12	4	23	16	0.865924	0.910569	0.469162	0.793286	-3.4761	3	Euarchonta	9
Pan_troglodytes	7	13	4	24	17	0.85539	0.89371	0.457344	0.769891	-3.39348	3.25	Euarchonta	9
Pan_paniscus	7	13	4	24	17	0.85539	0.89371	0.457344	0.769891	-3.39348	3.25	Euarchonta	9
Homo_sapiens	7	12	5	24	17	0.895203	0.935307	0.513551	0.864509	-3.70541	2.4	Euarchonta	9
Gorilla_gorilla	7	13	4	24	17	0.85539	0.89371	0.457344	0.769891	-3.39348	3.25	Euarchonta	9
Gorilla_beringei	7	13	3	23	16	0.814678	0.856681	0.395496	0.668728	-3.09453	4.33333	Euarchonta	9
Semnopithecus_schistaceus	7	12	7	26	19	0.931699	0.9669	0.569869	0.946987	-4.04888	1.71429	Euarchonta	9
Trachypithecus_cristatus	7	12	7	26	19	0.931699	0.9669	0.569869	0.946987	-4.04888	1.71429	Euarchonta	9
Trachypithecus_phayrei	7	12	7	26	19	0.931699	0.9669	0.569869	0.946987	-4.04888	1.71429	Euarchonta	9
Semnopithecus_entellus	7	12	7	26	19	0.931699	0.9669	0.569869	0.946987	-4.04888	1.71429	Euarchonta	9
Presbytis_rubicunda	7	12	7	26	19	0.931699	0.9669	0.569869	0.946987	-4.04888	1.71429	Euarchonta	9
Presbytis_melalophos	7	12	7	26	19	0.931699	0.9669	0.569869	0.946987	-4.04888	1.71429	Euarchonta	9
Rhinopithecus_bieti	7	12	7	26	19	0.931699	0.9669	0.569869	0.946987	-4.04888	1.71429	Euarchonta	9
Rhinopithecus_roxellana	7	12	7	26	19	0.931699	0.9669	0.569869	0.946987	-4.04888	1.71429	Euarchonta	9
Nasalis_larvatus	7	12	7	26	19	0.931699	0.9669	0.569869	0.946987	-4.04888	1.71429	Euarchonta	9
Colobus_guereza	7	12	7	26	19	0.931699	0.9669	0.569869	0.946987	-4.04888	1.71429	Euarchonta	9
Colobus_vellerosus	7	12	7	26	19	0.931699	0.9669	0.569869	0.946987	-4.04888	1.71429	Euarchonta	9
Macaca_leonina	7	12	7	26	19	0.931699	0.9669	0.569869	0.946987	-4.04888	1.71429	Euarchonta	9
Macaca_sinica	7	12	7	26	19	0.931699	0.9669	0.569869	0.946987	-4.04888	1.71429	Euarchonta	9
Macaca_silenus	7	12	7	26	19	0.931699	0.9669	0.569869	0.946987	-4.04888	1.71429	Euarchonta	9
Macaca_nemestrina	7	12	7	26	19	0.931699	0.9669	0.569869	0.946987	-4.04888	1.71429	Euarchonta	9
Macaca_maura	7	12	7	26	19	0.931699	0.9669	0.569869	0.946987	-4.04888	1.71429	Euarchonta	9
Macaca_radiata	7	12	7	26	19	0.931699	0.9669	0.569869	0.946987	-4.04888	1.71429	Euarchonta	9
Macaca_fascicularis	7	12	7	26	19	0.931699	0.9669	0.569869	0.946987	-4.04888	1.71429	Euarchonta	9
Macaca_arctoides	7	12	7	26	19	0.931699	0.9669	0.569869	0.946987	-4.04888	1.71429	Euarchonta	9
Macaca_nigra	7	12	7	26	19	0.931699	0.9669	0.569869	0.946987	-4.04888	1.71429	Euarchonta	9
Macaca_fuscata	7	12	7	26	19	0.931699	0.9669	0.569869	0.946987	-4.04888	1.71429	Euarchonta	9
Macaca_mulatta	7	12	7	26	19	0.931699	0.9669	0.569869	0.946987	-4.04888	1.71429	Euarchonta	9
Macaca_sylvanus	7	12	7	26	19	0.931699	0.9669	0.569869	0.946987	-4.04888	1.71429	Euarchonta	9
Theropithecus_gelada	7	13	6	26	19	0.907889	0.942191	0.537288	0.892845	-3.81007	2.16667	Euarchonta	9
Papio_cynocephalus	7	13	6	26	19	0.907889	0.942191	0.537288	0.892845	-3.81007	2.16667	Euarchonta	9
Papio_papio	7	13	6	26	19	0.907889	0.942191	0.537288	0.892845	-3.81007	2.16667	Euarchonta	9
Papio_hamadryas	7	13	6	26	19	0.907889	0.942191	0.537288	0.892845	-3.81007	2.16667	Euarchonta	9
Papio_anubis	7	13	6	26	19	0.907889	0.942191	0.537288	0.892845	-3.81007	2.16667	Euarchonta	9
Lophocebus_aterrimus	7	13	6	26	19	0.907889	0.942191	0.537288	0.892845	-3.81007	2.16667	Euarchonta	9
Lophocebus_albigena	7	13	6	26	19	0.907889	0.942191	0.537288	0.892845	-3.81007	2.16667	Euarchonta	9
Cercocebus_atys	7	12	7	26	19	0.931699	0.9669	0.569869	0.946987	-4.04888	1.71429	Euarchonta	9
Mandrillus_sphinx	7	12	7	26	19	0.931699	0.9669	0.569869	0.946987	-4.04888	1.71429	Euarchonta	9
Mandrillus_leucophaeus	7	12	7	26	19	0.931699	0.9669	0.569869	0.946987	-4.04888	1.71429	Euarchonta	9
Cercopithecus_mitis	7	12	7	26	19	0.931699	0.9669	0.569869	0.946987	-4.04888	1.71429	Euarchonta	9
Cercopithecus_ascanius	7	12	7	26	19	0.931699	0.9669	0.569869	0.946987	-4.04888	1.71429	Euarchonta	9
Erythrocebus_patas	7	12	7	26	19	0.931699	0.9669	0.569869	0.946987	-4.04888	1.71429	Euarchonta	9
Chlorocebus_pygerythrus	7	12	7	26	19	0.931699	0.9669	0.569869	0.946987	-4.04888	1.71429	Euarchonta	9
Chlorocebus_aethiops	7	12	7	26	19	0.931699	0.9669	0.569869	0.946987	-4.04888	1.71429	Euarchonta	9
Chlorocebus_cynosuros	7	12	7	26	19	0.931699	0.9669	0.569869	0.946987	-4.04888	1.71429	Euarchonta	9
Chlorocebus_sabaeus	7	12	7	26	19	0.931699	0.9669	0.569869	0.946987	-4.04888	1.71429	Euarchonta	9
Miopithecus_talapoin	7	13	6	26	19	0.907889	0.942191	0.537288	0.892845	-3.81007	2.16667	Euarchonta	9
Ptilocercus_lowii	7	14	5	26	19	0.875301	0.908371	0.492693	0.818739	-3.54715	2.8	Euarchonta	9
Tupaia_glis	7	13	6	26	19	0.907889	0.942191	0.537288	0.892845	-3.81007	2.16667	Euarchonta	9
Tupaia_nicobarica	7	13	6	26	19	0.907889	0.942191	0.537288	0.892845	-3.81007	2.16667	Euarchonta	9
Urogale_everetti	7	13	6	26	19	0.907889	0.942191	0.537288	0.892845	-3.81007	2.16667	Euarchonta	9
Tupaia_tana	7	13	6	26	19	0.907889	0.942191	0.537288	0.892845	-3.81007	2.16667	Euarchonta	9
Dendrogale_melanura	7	13	6	26	19	0.907889	0.942191	0.537288	0.892845	-3.81007	2.16667	Euarchonta	9
Anathana_ellioti	7	13	6	26	19	0.907889	0.942191	0.537288	0.892845	-3.81007	2.16667	Euarchonta	9
Sylvilagus_audubonii	7	12	7	26	19	0.931699	0.9669	0.569869	0.946987	-4.04888	1.71429	Glires	5
Oryctolagus_cuniculus	7	12	7	26	19	0.931699	0.9669	0.569869	0.946987	-4.04888	1.71429	Glires	5
Pentalagus_furnessi	7	12	7	26	19	0.931699	0.9669	0.569869	0.946987	-4.04888	1.71429	Glires	5
Lepus_californicus	7	12	7	26	19	0.931699	0.9669	0.569869	0.946987	-4.04888	1.71429	Glires	5
Lepus_alleni	7	12	7	26	19	0.931699	0.9669	0.569869	0.946987	-4.04888	1.71429	Glires	5
Lepus_townsendii	7	12	7	26	19	0.931699	0.9669	0.569869	0.946987	-4.04888	1.71429	Glires	5
Lepus_timidus	7	12	7	26	19	0.931699	0.9669	0.569869	0.946987	-4.04888	1.71429	Glires	5
Lepus_europaeus	7	12	7	26	19	0.931699	0.9669	0.569869	0.946987	-4.04888	1.71429	Glires	5
Lepus_americanus	7	12	7	26	19	0.931699	0.9669	0.569869	0.946987	-4.04888	1.71429	Glires	5
Nesolagus_timminsi	7	12	7	26	19	0.931699	0.9669	0.569869	0.946987	-4.04888	1.71429	Glires	5
Nesolagus_netscheri	7	12	7	26	19	0.931699	0.9669	0.569869	0.946987	-4.04888	1.71429	Glires	5
Ochotona_hyperborea	7	18	4	29	22	0.798565	0.81987	0.40444	0.660724	-3.05505	4.5	Glires	5
Ochotona_princeps	7	17	5	29	22	0.842735	0.865219	0.462664	0.755844	-3.3468	3.4	Glires	5
Muscardinus_avellanarius	7	13	6	26	19	0.907889	0.942191	0.537288	0.892845	-3.81007	2.16667	Glires	5
Aplodontia_rufa	7	13	6	26	19	0.907889	0.942191	0.537288	0.892845	-3.81007	2.16667	Glires	5
Ratufa_indica	7	13	6	26	19	0.907889	0.942191	0.537288	0.892845	-3.81007	2.16667	Glires	5
Callosciurus_erythraeus	7	12	7	26	19	0.931699	0.9669	0.569869	0.946987	-4.04888	1.71429	Glires	5
Tamias_striatus	7	12	7	26	19	0.931699	0.9669	0.569869	0.946987	-4.04888	1.71429	Glires	5
Tamias_minimus	7	12	7	26	19	0.931699	0.9669	0.569869	0.946987	-4.04888	1.71429	Glires	5
Spermophilus_dauricus	7	12	7	26	19	0.931699	0.9669	0.569869	0.946987	-4.04888	1.71429	Glires	5
Ictidomys_tridecemlineatus	7	10	5	22	15	0.911551	0.963387	0.533825	0.913092	-3.89182	2	Glires	5
Cynomys_ludovicianus	7	12	7	26	19	0.931699	0.9669	0.569869	0.946987	-4.04888	1.71429	Glires	5
Marmota_monax	7	12	7	26	19	0.931699	0.9669	0.569869	0.946987	-4.04888	1.71429	Glires	5
Marmota_caligata	7	12	7	26	19	0.931699	0.9669	0.569869	0.946987	-4.04888	1.71429	Glires	5
Marmota_marmota	7	12	7	26	19	0.931699	0.9669	0.569869	0.946987	-4.04888	1.71429	Glires	5
Marmota_sibirica	7	12	7	26	19	0.931699	0.9669	0.569869	0.946987	-4.04888	1.71429	Glires	5
Sciurus_anomalus	7	12	7	26	19	0.931699	0.9669	0.569869	0.946987	-4.04888	1.71429	Glires	5
Sciurus_niger	7	12	7	26	19	0.931699	0.9669	0.569869	0.946987	-4.04888	1.71429	Glires	5
Sciurus_carolinensis	7	12	7	26	19	0.931699	0.9669	0.569869	0.946987	-4.04888	1.71429	Glires	5
Sciurus_griseus	7	12	7	26	19	0.931699	0.9669	0.569869	0.946987	-4.04888	1.71429	Glires	5
Microsciurus_mimulus	7	12	7	26	19	0.931699	0.9669	0.569869	0.946987	-4.04888	1.71429	Glires	5
Microsciurus_alfari	7	12	7	26	19	0.931699	0.9669	0.569869	0.946987	-4.04888	1.71429	Glires	5
Microsciurus_flaviventer	7	12	7	26	19	0.931699	0.9669	0.569869	0.946987	-4.04888	1.71429	Glires	5
Sciurus_vulgaris	7	12	7	26	19	0.931699	0.9669	0.569869	0.946987	-4.04888	1.71429	Glires	5
Tamiasciurus_hudsonicus	7	12	7	26	19	0.931699	0.9669	0.569869	0.946987	-4.04888	1.71429	Glires	5
Glaucomys_volans	7	12	7	26	19	0.931699	0.9669	0.569869	0.946987	-4.04888	1.71429	Glires	5
Petaurista_leucogenys	7	12	7	26	19	0.931699	0.9669	0.569869	0.946987	-4.04888	1.71429	Glires	5
Petaurista_philippensis	7	12	7	26	19	0.931699	0.9669	0.569869	0.946987	-4.04888	1.71429	Glires	5
Petaurista_alborufus	7	12	7	26	19	0.931699	0.9669	0.569869	0.946987	-4.04888	1.71429	Glires	5
Petaurista_grandis	7	12	7	26	19	0.931699	0.9669	0.569869	0.946987	-4.04888	1.71429	Glires	5
Laonastes_aenigmamus	7	9	11	27	20	0.952898	0.983794	0.601574	0.99214	-4.79763	0.818182	Glires	5
Atherurus_macrourus	7	15	4	26	19	0.833047	0.864521	0.434872	0.722653	-3.24519	3.75	Glires	5
Hystrix_javanica	7	14	5	26	19	0.875301	0.908371	0.492693	0.818739	-3.54715	2.8	Glires	5
Hystrix_cristata	7	14	5	26	19	0.875301	0.908371	0.492693	0.818739	-3.54715	2.8	Glires	5
Thryonomys_swinderianus	7	13	5	25	18	0.885552	0.922735	0.503099	0.839137	-3.62331	2.6	Glires	5
Heterocephalus_glaber	7	11	8	26	19	0.947293	0.983084	0.591209	0.982449	-4.27287	1.375	Glires	5
Heliophobius_argenteocinereus	7	12	6	25	18	0.916479	0.954961	0.546054	0.910783	-3.89182	2	Glires	5
Cryptomys_hottentotus	7	13	6	26	19	0.907889	0.942191	0.537288	0.892845	-3.81007	2.16667	Glires	5
Georychus_capensis	7	12	7	26	19	0.931699	0.9669	0.569869	0.946987	-4.04888	1.71429	Glires	5
Bathyergus_suillus	7	13	7	27	20	0.924261	0.954229	0.562915	0.928382	-3.96739	1.85714	Glires	5
Cuniculus_paca	7	13	6	26	19	0.907889	0.942191	0.537288	0.892845	-3.81007	2.16667	Glires	5
Myoprocta_acouchy	7	13	6	26	19	0.907889	0.942191	0.537288	0.892845	-3.81007	2.16667	Glires	5
Dasyprocta_leporina	7	12	7	26	19	0.931699	0.9669	0.569869	0.946987	-4.04888	1.71429	Glires	5
Dasyprocta_azarae	7	13	7	27	20	0.924261	0.954229	0.562915	0.928382	-3.96739	1.85714	Glires	5
Hydrochoerus_hydrochaeris	7	13	6	26	19	0.907889	0.942191	0.537288	0.892845	-3.81007	2.16667	Glires	5
Dolichotis_patagonum	7	12	7	26	19	0.931699	0.9669	0.569869	0.946987	-4.04888	1.71429	Glires	5
Cavia_porcellus	7	13	6	26	19	0.907889	0.942191	0.537288	0.892845	-3.81007	2.16667	Glires	5
Cavia_aperea	7	13	6	26	19	0.907889	0.942191	0.537288	0.892845	-3.81007	2.16667	Glires	5
Erethizon_dorsatum	7	14	6	27	20	0.898589	0.927725	0.528257	0.871223	-3.73426	2.33333	Glires	5
Coendou_prehensilis	7	15	6	28	21	0.888788	0.915545	0.519125	0.853461	-3.66356	2.5	Glires	5
Lagostomus_maximus	7	12	7	26	19	0.931699	0.9669	0.569869	0.946987	-4.04888	1.71429	Glires	5
Chinchilla_lanigera	7	13	6	26	19	0.907889	0.942191	0.537288	0.892845	-3.81007	2.16667	Glires	5
Chinchilla_chinchilla	7	13	6	26	19	0.907889	0.942191	0.537288	0.892845	-3.81007	2.16667	Glires	5
Phyllomys_sulinus	7	14	6	27	20	0.898589	0.927725	0.528257	0.871223	-3.73426	2.33333	Glires	5
Myocastor_coypus	7	13	6	26	19	0.907889	0.942191	0.537288	0.892845	-3.81007	2.16667	Glires	5
Capromys_pilorides	7	16	7	30	23	0.897868	0.91791	0.53955	0.879048	-3.75537	2.28571	Glires	5
Ctenomys_boliviensis	7	12	7	26	19	0.931699	0.9669	0.569869	0.946987	-4.04888	1.71429	Glires	5
Ctenomys_talarum	7	12	7	26	19	0.931699	0.9669	0.569869	0.946987	-4.04888	1.71429	Glires	5
Octodon_degus	7	12	7	26	19	0.931699	0.9669	0.569869	0.946987	-4.04888	1.71429	Glires	5
Spalacopus_cyanus	7	13	7	27	20	0.924261	0.954229	0.562915	0.928382	-3.96739	1.85714	Glires	5
Dipus_sagitta	7	12	7	26	19	0.931699	0.9669	0.569869	0.946987	-4.04888	1.71429	Glires	5
Jaculus_orientalis	7	12	7	26	19	0.931699	0.9669	0.569869	0.946987	-4.04888	1.71429	Glires	5
Jaculus_jaculus	7	12	7	26	19	0.931699	0.9669	0.569869	0.946987	-4.04888	1.71429	Glires	5
Stylodipus_telum	7	12	7	26	19	0.931699	0.9669	0.569869	0.946987	-4.04888	1.71429	Glires	5
Allactaga_euphratica	7	12	7	26	19	0.931699	0.9669	0.569869	0.946987	-4.04888	1.71429	Glires	5
Allactaga_major	7	13	6	26	19	0.907889	0.942191	0.537288	0.892845	-3.81007	2.16667	Glires	5
Zapus_princeps	7	13	6	26	19	0.907889	0.942191	0.537288	0.892845	-3.81007	2.16667	Glires	5
Sicista_concolor	7	13	6	26	19	0.907889	0.942191	0.537288	0.892845	-3.81007	2.16667	Glires	5
Spalax_leucodon	7	13	6	26	19	0.907889	0.942191	0.537288	0.892845	-3.81007	2.16667	Glires	5
Rhizomys_pruinosus	7	15	5	27	20	0.864652	0.892687	0.482443	0.795664	-3.4761	3	Glires	5
Dicrostonyx_groenlandicus	7	13	6	26	19	0.907889	0.942191	0.537288	0.892845	-3.81007	2.16667	Glires	5
Ondatra_zibethicus	7	13	6	26	19	0.907889	0.942191	0.537288	0.892845	-3.81007	2.16667	Glires	5
Lemmus_sibiricus	7	13	6	26	19	0.907889	0.942191	0.537288	0.892845	-3.81007	2.16667	Glires	5
Synaptomys_cooperi	7	13	6	26	19	0.907889	0.942191	0.537288	0.892845	-3.81007	2.16667	Glires	5
Ellobius_talpinus	7	13	6	26	19	0.907889	0.942191	0.537288	0.892845	-3.81007	2.16667	Glires	5
Microtus_arvalis	7	13	6	26	19	0.907889	0.942191	0.537288	0.892845	-3.81007	2.16667	Glires	5
Microtus_pennsylvanicus	7	13	6	26	19	0.907889	0.942191	0.537288	0.892845	-3.81007	2.16667	Glires	5
Microtus_ochrogaster	7	13	6	26	19	0.907889	0.942191	0.537288	0.892845	-3.81007	2.16667	Glires	5
Microtus_chrotorrhinus	7	13	6	26	19	0.907889	0.942191	0.537288	0.892845	-3.81007	2.16667	Glires	5
Microtus_oeconomus	7	13	6	26	19	0.907889	0.942191	0.537288	0.892845	-3.81007	2.16667	Glires	5
Myodes_gapperi	7	13	6	26	19	0.907889	0.942191	0.537288	0.892845	-3.81007	2.16667	Glires	5
Mesocricetus_auratus	7	13	6	26	19	0.907889	0.942191	0.537288	0.892845	-3.81007	2.16667	Glires	5
Tscherskia_triton	7	13	6	26	19	0.907889	0.942191	0.537288	0.892845	-3.81007	2.16667	Glires	5
Cricetus_cricetus	7	13	6	26	19	0.907889	0.942191	0.537288	0.892845	-3.81007	2.16667	Glires	5
Cricetulus_migratorius	7	13	6	26	19	0.907889	0.942191	0.537288	0.892845	-3.81007	2.16667	Glires	5
Cricetulus_longicaudatus	7	13	6	26	19	0.907889	0.942191	0.537288	0.892845	-3.81007	2.16667	Glires	5
Cricetulus_barabensis	7	13	6	26	19	0.907889	0.942191	0.537288	0.892845	-3.81007	2.16667	Glires	5
Phodopus_sungorus	7	13	6	26	19	0.907889	0.942191	0.537288	0.892845	-3.81007	2.16667	Glires	5
Neotoma_fuscipes	7	13	6	26	19	0.907889	0.942191	0.537288	0.892845	-3.81007	2.16667	Glires	5
Neotoma_lepida	7	13	6	26	19	0.907889	0.942191	0.537288	0.892845	-3.81007	2.16667	Glires	5
Neotoma_floridana	7	13	6	26	19	0.907889	0.942191	0.537288	0.892845	-3.81007	2.16667	Glires	5
Neotoma_albigula	7	13	6	26	19	0.907889	0.942191	0.537288	0.892845	-3.81007	2.16667	Glires	5
Neotoma_mexicana	7	13	6	26	19	0.907889	0.942191	0.537288	0.892845	-3.81007	2.16667	Glires	5
Neotoma_cinerea	7	13	6	26	19	0.907889	0.942191	0.537288	0.892845	-3.81007	2.16667	Glires	5
Hodomys_alleni	7	13	6	26	19	0.907889	0.942191	0.537288	0.892845	-3.81007	2.16667	Glires	5
Nelsonia_neotomodon	7	13	6	26	19	0.907889	0.942191	0.537288	0.892845	-3.81007	2.16667	Glires	5
Xenomys_nelsoni	7	14	6	27	20	0.898589	0.927725	0.528257	0.871223	-3.73426	2.33333	Glires	5
Ochrotomys_nuttalli	7	13	6	26	19	0.907889	0.942191	0.537288	0.892845	-3.81007	2.16667	Glires	5
Reithrodontomys_creper	7	13	6	26	19	0.907889	0.942191	0.537288	0.892845	-3.81007	2.16667	Glires	5
Reithrodontomys_mexicanus	7	13	6	26	19	0.907889	0.942191	0.537288	0.892845	-3.81007	2.16667	Glires	5
Reithrodontomys_fulvescens	7	13	6	26	19	0.907889	0.942191	0.537288	0.892845	-3.81007	2.16667	Glires	5
Reithrodontomys_sumichrasti	7	13	6	26	19	0.907889	0.942191	0.537288	0.892845	-3.81007	2.16667	Glires	5
Reithrodontomys_megalotis	7	13	6	26	19	0.907889	0.942191	0.537288	0.892845	-3.81007	2.16667	Glires	5
Reithrodontomys_humulis	7	13	6	26	19	0.907889	0.942191	0.537288	0.892845	-3.81007	2.16667	Glires	5
Reithrodontomys_montanus	7	13	6	26	19	0.907889	0.942191	0.537288	0.892845	-3.81007	2.16667	Glires	5
Isthmomys_pirrensis	7	13	6	26	19	0.907889	0.942191	0.537288	0.892845	-3.81007	2.16667	Glires	5
Isthmomys_flavidus	7	13	6	26	19	0.907889	0.942191	0.537288	0.892845	-3.81007	2.16667	Glires	5
Onychomys_torridus	7	13	6	26	19	0.907889	0.942191	0.537288	0.892845	-3.81007	2.16667	Glires	5
Onychomys_leucogaster	7	13	6	26	19	0.907889	0.942191	0.537288	0.892845	-3.81007	2.16667	Glires	5
Peromyscus_maniculatus	7	13	6	26	19	0.907889	0.942191	0.537288	0.892845	-3.81007	2.16667	Glires	5
Peromyscus_leucopus	7	13	6	26	19	0.907889	0.942191	0.537288	0.892845	-3.81007	2.16667	Glires	5
Megadontomys_thomasi	7	13	6	26	19	0.907889	0.942191	0.537288	0.892845	-3.81007	2.16667	Glires	5
Peromyscus_yucatanicus	7	13	6	26	19	0.907889	0.942191	0.537288	0.892845	-3.81007	2.16667	Glires	5
Peromyscus_guatemalensis	7	13	6	26	19	0.907889	0.942191	0.537288	0.892845	-3.81007	2.16667	Glires	5
Peromyscus_mexicanus	7	13	6	26	19	0.907889	0.942191	0.537288	0.892845	-3.81007	2.16667	Glires	5
Peromyscus_megalops	7	13	6	26	19	0.907889	0.942191	0.537288	0.892845	-3.81007	2.16667	Glires	5
Peromyscus_melanophrys	7	13	6	26	19	0.907889	0.942191	0.537288	0.892845	-3.81007	2.16667	Glires	5
Habromys_lepturus	7	13	7	27	20	0.924261	0.954229	0.562915	0.928382	-3.96739	1.85714	Glires	5
Habromys_lophurus	7	13	7	27	20	0.924261	0.954229	0.562915	0.928382	-3.96739	1.85714	Glires	5
Peromyscus_crinitus	7	13	6	26	19	0.907889	0.942191	0.537288	0.892845	-3.81007	2.16667	Glires	5
Peromyscus_ochraventer	7	13	6	26	19	0.907889	0.942191	0.537288	0.892845	-3.81007	2.16667	Glires	5
Peromyscus_truei	7	13	6	26	19	0.907889	0.942191	0.537288	0.892845	-3.81007	2.16667	Glires	5
Peromyscus_difficilis	7	13	6	26	19	0.907889	0.942191	0.537288	0.892845	-3.81007	2.16667	Glires	5
Peromyscus_attwateri	7	13	6	26	19	0.907889	0.942191	0.537288	0.892845	-3.81007	2.16667	Glires	5
Peromyscus_furvus	7	13	6	26	19	0.907889	0.942191	0.537288	0.892845	-3.81007	2.16667	Glires	5
Peromyscus_spicilegus	7	13	6	26	19	0.907889	0.942191	0.537288	0.892845	-3.81007	2.16667	Glires	5
Peromyscus_boylii	7	13	6	26	19	0.907889	0.942191	0.537288	0.892845	-3.81007	2.16667	Glires	5
Podomys_floridanus	7	13	6	26	19	0.907889	0.942191	0.537288	0.892845	-3.81007	2.16667	Glires	5
Neotomodon_alstoni	7	13	6	26	19	0.907889	0.942191	0.537288	0.892845	-3.81007	2.16667	Glires	5
Peromyscus_californicus	7	13	6	26	19	0.907889	0.942191	0.537288	0.892845	-3.81007	2.16667	Glires	5
Peromyscus_eremicus	7	13	6	26	19	0.907889	0.942191	0.537288	0.892845	-3.81007	2.16667	Glires	5
Osgoodomys_banderanus	7	13	6	26	19	0.907889	0.942191	0.537288	0.892845	-3.81007	2.16667	Glires	5
Scotinomys_xerampelinus	7	13	6	26	19	0.907889	0.942191	0.537288	0.892845	-3.81007	2.16667	Glires	5
Scotinomys_teguina	7	13	6	26	19	0.907889	0.942191	0.537288	0.892845	-3.81007	2.16667	Glires	5
Baiomys_taylori	7	13	6	26	19	0.907889	0.942191	0.537288	0.892845	-3.81007	2.16667	Glires	5
Baiomys_musculus	7	13	6	26	19	0.907889	0.942191	0.537288	0.892845	-3.81007	2.16667	Glires	5
Tylomys_panamensis	7	14	6	27	20	0.898589	0.927725	0.528257	0.871223	-3.73426	2.33333	Glires	5
Tylomys_mirae	7	14	6	27	20	0.898589	0.927725	0.528257	0.871223	-3.73426	2.33333	Glires	5
Tylomys_watsoni	7	14	6	27	20	0.898589	0.927725	0.528257	0.871223	-3.73426	2.33333	Glires	5
Tylomys_fulviventer	7	14	6	27	20	0.898589	0.927725	0.528257	0.871223	-3.73426	2.33333	Glires	5
Tylomys_nudicaudus	7	14	6	27	20	0.898589	0.927725	0.528257	0.871223	-3.73426	2.33333	Glires	5
Ototylomys_phyllotis	7	15	6	28	21	0.888788	0.915545	0.519125	0.853461	-3.66356	2.5	Glires	5
Nyctomys_sumichrasti	7	13	6	26	19	0.907889	0.942191	0.537288	0.892845	-3.81007	2.16667	Glires	5
Chibchanomys_trichotis	7	14	5	26	19	0.875301	0.908371	0.492693	0.818739	-3.54715	2.8	Glires	5
Reithrodon_auritus	7	12	7	26	19	0.931699	0.9669	0.569869	0.946987	-4.04888	1.71429	Glires	5
Rheomys_underwoodi	7	13	6	26	19	0.907889	0.942191	0.537288	0.892845	-3.81007	2.16667	Glires	5
Rheomys_thomasi	7	13	6	26	19	0.907889	0.942191	0.537288	0.892845	-3.81007	2.16667	Glires	5
Rheomys_mexicanus	7	13	6	26	19	0.907889	0.942191	0.537288	0.892845	-3.81007	2.16667	Glires	5
Rheomys_raptor	7	13	6	26	19	0.907889	0.942191	0.537288	0.892845	-3.81007	2.16667	Glires	5
Ichthyomys_pittieri	7	13	6	26	19	0.907889	0.942191	0.537288	0.892845	-3.81007	2.16667	Glires	5
Ichthyomys_hydrobates	7	13	6	26	19	0.907889	0.942191	0.537288	0.892845	-3.81007	2.16667	Glires	5
Ichthyomys_tweedii	7	13	6	26	19	0.907889	0.942191	0.537288	0.892845	-3.81007	2.16667	Glires	5
Neusticomys_venezuelae	7	14	5	26	19	0.875301	0.908371	0.492693	0.818739	-3.54715	2.8	Glires	5
Neusticomys_ferreirai	7	13	6	26	19	0.907889	0.942191	0.537288	0.892845	-3.81007	2.16667	Glires	5
Neusticomys_monticolus	7	13	6	26	19	0.907889	0.942191	0.537288	0.892845	-3.81007	2.16667	Glires	5
Anotomys_leander	7	14	6	27	20	0.898589	0.927725	0.528257	0.871223	-3.73426	2.33333	Glires	5
Chinchillula_sahamae	7	13	6	26	19	0.907889	0.942191	0.537288	0.892845	-3.81007	2.16667	Glires	5
Sigmodon_leucotis	7	12	7	26	19	0.931699	0.9669	0.569869	0.946987	-4.04888	1.71429	Glires	5
Sigmodon_fulviventer	7	12	7	26	19	0.931699	0.9669	0.569869	0.946987	-4.04888	1.71429	Glires	5
Sigmodon_alleni	7	12	7	26	19	0.931699	0.9669	0.569869	0.946987	-4.04888	1.71429	Glires	5
Sigmodon_ochrognathus	7	12	7	26	19	0.931699	0.9669	0.569869	0.946987	-4.04888	1.71429	Glires	5
Sigmodon_hispidus	7	12	7	26	19	0.931699	0.9669	0.569869	0.946987	-4.04888	1.71429	Glires	5
Rhipidomys_macconnelli	7	13	6	26	19	0.907889	0.942191	0.537288	0.892845	-3.81007	2.16667	Glires	5
Rhipidomys_nitela	7	12	7	26	19	0.931699	0.9669	0.569869	0.946987	-4.04888	1.71429	Glires	5
Rhipidomys_mastacalis	7	12	7	26	19	0.931699	0.9669	0.569869	0.946987	-4.04888	1.71429	Glires	5
Rhipidomys_fulviventer	7	13	6	26	19	0.907889	0.942191	0.537288	0.892845	-3.81007	2.16667	Glires	5
Rhipidomys_venustus	7	13	6	26	19	0.907889	0.942191	0.537288	0.892845	-3.81007	2.16667	Glires	5
Rhipidomys_couesi	7	12	7	26	19	0.931699	0.9669	0.569869	0.946987	-4.04888	1.71429	Glires	5
Rhipidomys_venezuelae	7	12	7	26	19	0.931699	0.9669	0.569869	0.946987	-4.04888	1.71429	Glires	5
Rhipidomys_latimanus	7	13	6	26	19	0.907889	0.942191	0.537288	0.892845	-3.81007	2.16667	Glires	5
Rhipidomys_austrinus	7	13	6	26	19	0.907889	0.942191	0.537288	0.892845	-3.81007	2.16667	Glires	5
Aepeomys_lugens	7	13	6	26	19	0.907889	0.942191	0.537288	0.892845	-3.81007	2.16667	Glires	5
Thomasomys_gracilis	7	13	6	26	19	0.907889	0.942191	0.537288	0.892845	-3.81007	2.16667	Glires	5
Thomasomys_cinereus	7	13	6	26	19	0.907889	0.942191	0.537288	0.892845	-3.81007	2.16667	Glires	5
Thomasomys_rhoadsi	7	13	6	26	19	0.907889	0.942191	0.537288	0.892845	-3.81007	2.16667	Glires	5
Thomasomys_baeops	7	13	7	27	20	0.924261	0.954229	0.562915	0.928382	-3.96739	1.85714	Glires	5
Thomasomys_aureus	7	13	6	26	19	0.907889	0.942191	0.537288	0.892845	-3.81007	2.16667	Glires	5
Thomasomys_pyrrhonotus	7	13	7	27	20	0.924261	0.954229	0.562915	0.928382	-3.96739	1.85714	Glires	5
Thomasomys_daphne	7	13	6	26	19	0.907889	0.942191	0.537288	0.892845	-3.81007	2.16667	Glires	5
Thomasomys_oreas	7	13	6	26	19	0.907889	0.942191	0.537288	0.892845	-3.81007	2.16667	Glires	5
Thomasomys_hylophilus	7	13	6	26	19	0.907889	0.942191	0.537288	0.892845	-3.81007	2.16667	Glires	5
Thomasomys_paramorum	7	13	6	26	19	0.907889	0.942191	0.537288	0.892845	-3.81007	2.16667	Glires	5
Chilomys_instans	7	13	6	26	19	0.907889	0.942191	0.537288	0.892845	-3.81007	2.16667	Glires	5
Akodon_bogotensis	7	12	7	26	19	0.931699	0.9669	0.569869	0.946987	-4.04888	1.71429	Glires	5
Blarinomys_breviceps	7	13	6	26	19	0.907889	0.942191	0.537288	0.892845	-3.81007	2.16667	Glires	5
Scapteromys_tumidus	7	13	6	26	19	0.907889	0.942191	0.537288	0.892845	-3.81007	2.16667	Glires	5
Scapteromys_meridionalis	7	13	6	26	19	0.907889	0.942191	0.537288	0.892845	-3.81007	2.16667	Glires	5
Scapteromys_aquaticus	7	13	6	26	19	0.907889	0.942191	0.537288	0.892845	-3.81007	2.16667	Glires	5
Kunsia_tomentosus	7	12	6	25	18	0.916479	0.954961	0.546054	0.910783	-3.89182	2	Glires	5
Thalpomys_lasiotis	7	13	6	26	19	0.907889	0.942191	0.537288	0.892845	-3.81007	2.16667	Glires	5
Necromys_amoenus	7	13	6	26	19	0.907889	0.942191	0.537288	0.892845	-3.81007	2.16667	Glires	5
Necromys_urichi	7	13	6	26	19	0.907889	0.942191	0.537288	0.892845	-3.81007	2.16667	Glires	5
Necromys_lasiurus	7	12	7	26	19	0.931699	0.9669	0.569869	0.946987	-4.04888	1.71429	Glires	5
Necromys_temchuki	7	13	6	26	19	0.907889	0.942191	0.537288	0.892845	-3.81007	2.16667	Glires	5
Necromys_obscurus	7	13	6	26	19	0.907889	0.942191	0.537288	0.892845	-3.81007	2.16667	Glires	5
Necromys_lactens	7	13	6	26	19	0.907889	0.942191	0.537288	0.892845	-3.81007	2.16667	Glires	5
Akodon_mimus	7	13	6	26	19	0.907889	0.942191	0.537288	0.892845	-3.81007	2.16667	Glires	5
Akodon_azarae	7	13	6	26	19	0.907889	0.942191	0.537288	0.892845	-3.81007	2.16667	Glires	5
Akodon_boliviensis	7	13	6	26	19	0.907889	0.942191	0.537288	0.892845	-3.81007	2.16667	Glires	5
Akodon_subfuscus	7	13	6	26	19	0.907889	0.942191	0.537288	0.892845	-3.81007	2.16667	Glires	5
Akodon_lutescens	7	13	6	26	19	0.907889	0.942191	0.537288	0.892845	-3.81007	2.16667	Glires	5
Akodon_cursor	7	13	6	26	19	0.907889	0.942191	0.537288	0.892845	-3.81007	2.16667	Glires	5
Akodon_simulator	7	13	6	26	19	0.907889	0.942191	0.537288	0.892845	-3.81007	2.16667	Glires	5
Akodon_albiventer	7	13	6	26	19	0.907889	0.942191	0.537288	0.892845	-3.81007	2.16667	Glires	5
Akodon_mollis	7	13	6	26	19	0.907889	0.942191	0.537288	0.892845	-3.81007	2.16667	Glires	5
Akodon_torques	7	13	6	26	19	0.907889	0.942191	0.537288	0.892845	-3.81007	2.16667	Glires	5
Akodon_aerosus	7	13	6	26	19	0.907889	0.942191	0.537288	0.892845	-3.81007	2.16667	Glires	5
Deltamys_kempi	7	13	6	26	19	0.907889	0.942191	0.537288	0.892845	-3.81007	2.16667	Glires	5
Thaptomys_nigrita	7	13	6	26	19	0.907889	0.942191	0.537288	0.892845	-3.81007	2.16667	Glires	5
Oxymycterus_delator	7	13	6	26	19	0.907889	0.942191	0.537288	0.892845	-3.81007	2.16667	Glires	5
Oxymycterus_paramensis	7	13	6	26	19	0.907889	0.942191	0.537288	0.892845	-3.81007	2.16667	Glires	5
Oxymycterus_rufus	7	13	6	26	19	0.907889	0.942191	0.537288	0.892845	-3.81007	2.16667	Glires	5
Oxymycterus_inca	7	13	6	26	19	0.907889	0.942191	0.537288	0.892845	-3.81007	2.16667	Glires	5
Zygodontomys_brevicauda	7	12	7	26	19	0.931699	0.9669	0.569869	0.946987	-4.04888	1.71429	Glires	5
Oecomys_concolor	7	12	7	26	19	0.931699	0.9669	0.569869	0.946987	-4.04888	1.71429	Glires	5
Oecomys_roberti	7	12	7	26	19	0.931699	0.9669	0.569869	0.946987	-4.04888	1.71429	Glires	5
Oecomys_bicolor	7	12	7	26	19	0.931699	0.9669	0.569869	0.946987	-4.04888	1.71429	Glires	5
Oecomys_superans	7	12	7	26	19	0.931699	0.9669	0.569869	0.946987	-4.04888	1.71429	Glires	5
Oecomys_trinitatis	7	12	7	26	19	0.931699	0.9669	0.569869	0.946987	-4.04888	1.71429	Glires	5
Oecomys_mamorae	7	12	7	26	19	0.931699	0.9669	0.569869	0.946987	-4.04888	1.71429	Glires	5
Oecomys_paricola	7	12	7	26	19	0.931699	0.9669	0.569869	0.946987	-4.04888	1.71429	Glires	5
Transandinomys_talamancae	7	12	7	26	19	0.931699	0.9669	0.569869	0.946987	-4.04888	1.71429	Glires	5
Transandinomys_bolivaris	7	12	7	26	19	0.931699	0.9669	0.569869	0.946987	-4.04888	1.71429	Glires	5
Euryoryzomys_nitidus	7	12	7	26	19	0.931699	0.9669	0.569869	0.946987	-4.04888	1.71429	Glires	5
Euryoryzomys_russatus	7	12	7	26	19	0.931699	0.9669	0.569869	0.946987	-4.04888	1.71429	Glires	5
Euryoryzomys_legatus	7	12	7	26	19	0.931699	0.9669	0.569869	0.946987	-4.04888	1.71429	Glires	5
Nephelomys_albigularis	7	12	7	26	19	0.931699	0.9669	0.569869	0.946987	-4.04888	1.71429	Glires	5
Nephelomys_keaysi	7	12	7	26	19	0.931699	0.9669	0.569869	0.946987	-4.04888	1.71429	Glires	5
Hylaeamys_megacephalus	7	12	7	26	19	0.931699	0.9669	0.569869	0.946987	-4.04888	1.71429	Glires	5
Handleyomys_alfaroi	7	12	7	26	19	0.931699	0.9669	0.569869	0.946987	-4.04888	1.71429	Glires	5
Handleyomys_melanotis	7	12	7	26	19	0.931699	0.9669	0.569869	0.946987	-4.04888	1.71429	Glires	5
Handleyomys_chapmani	7	12	7	26	19	0.931699	0.9669	0.569869	0.946987	-4.04888	1.71429	Glires	5
Neacomys_guianae	7	12	7	26	19	0.931699	0.9669	0.569869	0.946987	-4.04888	1.71429	Glires	5
Neacomys_spinosus	7	12	7	26	19	0.931699	0.9669	0.569869	0.946987	-4.04888	1.71429	Glires	5
Neacomys_tenuipes	7	12	7	26	19	0.931699	0.9669	0.569869	0.946987	-4.04888	1.71429	Glires	5
Microryzomys_minutus	7	12	7	26	19	0.931699	0.9669	0.569869	0.946987	-4.04888	1.71429	Glires	5
Microryzomys_altissimus	7	12	7	26	19	0.931699	0.9669	0.569869	0.946987	-4.04888	1.71429	Glires	5
Oligoryzomys_microtis	7	12	7	26	19	0.931699	0.9669	0.569869	0.946987	-4.04888	1.71429	Glires	5
Oligoryzomys_nigripes	7	12	7	26	19	0.931699	0.9669	0.569869	0.946987	-4.04888	1.71429	Glires	5
Oligoryzomys_destructor	7	12	7	26	19	0.931699	0.9669	0.569869	0.946987	-4.04888	1.71429	Glires	5
Oligoryzomys_fulvescens	7	12	7	26	19	0.931699	0.9669	0.569869	0.946987	-4.04888	1.71429	Glires	5
Oligoryzomys_eliurus	7	12	7	26	19	0.931699	0.9669	0.569869	0.946987	-4.04888	1.71429	Glires	5
Oligoryzomys_delticola	7	12	7	26	19	0.931699	0.9669	0.569869	0.946987	-4.04888	1.71429	Glires	5
Oligoryzomys_chacoensis	7	12	7	26	19	0.931699	0.9669	0.569869	0.946987	-4.04888	1.71429	Glires	5
Oligoryzomys_andinus	7	12	7	26	19	0.931699	0.9669	0.569869	0.946987	-4.04888	1.71429	Glires	5
Oligoryzomys_magellanicus	7	12	7	26	19	0.931699	0.9669	0.569869	0.946987	-4.04888	1.71429	Glires	5
Oligoryzomys_longicaudatus	7	12	7	26	19	0.931699	0.9669	0.569869	0.946987	-4.04888	1.71429	Glires	5
Oligoryzomys_flavescens	7	12	7	26	19	0.931699	0.9669	0.569869	0.946987	-4.04888	1.71429	Glires	5
Eremoryzomys_polius	7	12	7	26	19	0.931699	0.9669	0.569869	0.946987	-4.04888	1.71429	Glires	5
Cerradomys_subflavus	7	12	7	26	19	0.931699	0.9669	0.569869	0.946987	-4.04888	1.71429	Glires	5
Sooretamys_angouya	7	12	7	26	19	0.931699	0.9669	0.569869	0.946987	-4.04888	1.71429	Glires	5
Holochilus_brasiliensis	7	12	7	26	19	0.931699	0.9669	0.569869	0.946987	-4.04888	1.71429	Glires	5
Holochilus_chacarius	7	12	7	26	19	0.931699	0.9669	0.569869	0.946987	-4.04888	1.71429	Glires	5
Pseudoryzomys_simplex	7	12	7	26	19	0.931699	0.9669	0.569869	0.946987	-4.04888	1.71429	Glires	5
Lundomys_molitor	7	12	7	26	19	0.931699	0.9669	0.569869	0.946987	-4.04888	1.71429	Glires	5
Nectomys_squamipes	7	12	7	26	19	0.931699	0.9669	0.569869	0.946987	-4.04888	1.71429	Glires	5
Oryzomys_couesi	7	12	7	26	19	0.931699	0.9669	0.569869	0.946987	-4.04888	1.71429	Glires	5
Oryzomys_palustris	7	12	7	26	19	0.931699	0.9669	0.569869	0.946987	-4.04888	1.71429	Glires	5
Sigmodontomys_alfari	7	12	7	26	19	0.931699	0.9669	0.569869	0.946987	-4.04888	1.71429	Glires	5
Melanomys_caliginosus	7	12	7	26	19	0.931699	0.9669	0.569869	0.946987	-4.04888	1.71429	Glires	5
Nesoryzomys_indefessus	7	13	6	26	19	0.907889	0.942191	0.537288	0.892845	-3.81007	2.16667	Glires	5
Irenomys_tarsalis	7	13	6	26	19	0.907889	0.942191	0.537288	0.892845	-3.81007	2.16667	Glires	5
Euneomys_petersoni	7	13	6	26	19	0.907889	0.942191	0.537288	0.892845	-3.81007	2.16667	Glires	5
Euneomys_chinchilloides	7	13	6	26	19	0.907889	0.942191	0.537288	0.892845	-3.81007	2.16667	Glires	5
Andinomys_edax	7	13	6	26	19	0.907889	0.942191	0.537288	0.892845	-3.81007	2.16667	Glires	5
Punomys_kofordi	7	13	6	26	19	0.907889	0.942191	0.537288	0.892845	-3.81007	2.16667	Glires	5
Delomys_sublineatus	7	13	6	26	19	0.907889	0.942191	0.537288	0.892845	-3.81007	2.16667	Glires	5
Delomys_dorsalis	7	13	6	26	19	0.907889	0.942191	0.537288	0.892845	-3.81007	2.16667	Glires	5
Calomys_lepidus	7	13	6	26	19	0.907889	0.942191	0.537288	0.892845	-3.81007	2.16667	Glires	5
Calomys_sorellus	7	13	6	26	19	0.907889	0.942191	0.537288	0.892845	-3.81007	2.16667	Glires	5
Calomys_musculinus	7	13	6	26	19	0.907889	0.942191	0.537288	0.892845	-3.81007	2.16667	Glires	5
Calomys_laucha	7	13	6	26	19	0.907889	0.942191	0.537288	0.892845	-3.81007	2.16667	Glires	5
Calomys_tener	7	12	7	26	19	0.931699	0.9669	0.569869	0.946987	-4.04888	1.71429	Glires	5
Calomys_boliviae	7	12	7	26	19	0.931699	0.9669	0.569869	0.946987	-4.04888	1.71429	Glires	5
Calomys_callosus	7	12	7	26	19	0.931699	0.9669	0.569869	0.946987	-4.04888	1.71429	Glires	5
Calomys_venustus	7	12	7	26	19	0.931699	0.9669	0.569869	0.946987	-4.04888	1.71429	Glires	5
Calomys_hummelincki	7	12	7	26	19	0.931699	0.9669	0.569869	0.946987	-4.04888	1.71429	Glires	5
Eligmodontia_morgani	7	13	6	26	19	0.907889	0.942191	0.537288	0.892845	-3.81007	2.16667	Glires	5
Eligmodontia_puerulus	7	13	6	26	19	0.907889	0.942191	0.537288	0.892845	-3.81007	2.16667	Glires	5
Eligmodontia_moreni	7	12	7	26	19	0.931699	0.9669	0.569869	0.946987	-4.04888	1.71429	Glires	5
Eligmodontia_hirtipes	7	12	7	26	19	0.931699	0.9669	0.569869	0.946987	-4.04888	1.71429	Glires	5
Eligmodontia_bolsonensis	7	12	7	26	19	0.931699	0.9669	0.569869	0.946987	-4.04888	1.71429	Glires	5
Graomys_griseoflavus	7	12	7	26	19	0.931699	0.9669	0.569869	0.946987	-4.04888	1.71429	Glires	5
Graomys_domorum	7	12	7	26	19	0.931699	0.9669	0.569869	0.946987	-4.04888	1.71429	Glires	5
Andalgalomys_pearsoni	7	13	6	26	19	0.907889	0.942191	0.537288	0.892845	-3.81007	2.16667	Glires	5
Andalgalomys_olrogi	7	12	7	26	19	0.931699	0.9669	0.569869	0.946987	-4.04888	1.71429	Glires	5
Salinomys_delicatus	7	12	7	26	19	0.931699	0.9669	0.569869	0.946987	-4.04888	1.71429	Glires	5
Phyllotis_wolffsohni	7	13	6	26	19	0.907889	0.942191	0.537288	0.892845	-3.81007	2.16667	Glires	5
Tapecomys_primus	7	13	6	26	19	0.907889	0.942191	0.537288	0.892845	-3.81007	2.16667	Glires	5
Auliscomys_sublimis	7	13	6	26	19	0.907889	0.942191	0.537288	0.892845	-3.81007	2.16667	Glires	5
Auliscomys_pictus	7	13	6	26	19	0.907889	0.942191	0.537288	0.892845	-3.81007	2.16667	Glires	5
Auliscomys_boliviensis	7	13	6	26	19	0.907889	0.942191	0.537288	0.892845	-3.81007	2.16667	Glires	5
Galenomys_garleppi	7	13	6	26	19	0.907889	0.942191	0.537288	0.892845	-3.81007	2.16667	Glires	5
Loxodontomys_micropus	7	13	6	26	19	0.907889	0.942191	0.537288	0.892845	-3.81007	2.16667	Glires	5
Phyllotis_osilae	7	13	6	26	19	0.907889	0.942191	0.537288	0.892845	-3.81007	2.16667	Glires	5
Phyllotis_alisosiensis	7	13	6	26	19	0.907889	0.942191	0.537288	0.892845	-3.81007	2.16667	Glires	5
Phyllotis_anitae	7	13	6	26	19	0.907889	0.942191	0.537288	0.892845	-3.81007	2.16667	Glires	5
Phyllotis_caprinus	7	13	6	26	19	0.907889	0.942191	0.537288	0.892845	-3.81007	2.16667	Glires	5
Phyllotis_xanthopygus	7	13	6	26	19	0.907889	0.942191	0.537288	0.892845	-3.81007	2.16667	Glires	5
Phyllotis_darwini	7	13	6	26	19	0.907889	0.942191	0.537288	0.892845	-3.81007	2.16667	Glires	5
Phyllotis_amicus	7	13	6	26	19	0.907889	0.942191	0.537288	0.892845	-3.81007	2.16667	Glires	5
Paralomys_gerbillus	7	13	6	26	19	0.907889	0.942191	0.537288	0.892845	-3.81007	2.16667	Glires	5
Phyllotis_haggardi	7	13	6	26	19	0.907889	0.942191	0.537288	0.892845	-3.81007	2.16667	Glires	5
Phyllotis_andium	7	13	6	26	19	0.907889	0.942191	0.537288	0.892845	-3.81007	2.16667	Glires	5
Calassomys_apicalis	7	12	7	26	19	0.931699	0.9669	0.569869	0.946987	-4.04888	1.71429	Glires	5
Akodon_neocenus	7	13	6	26	19	0.907889	0.942191	0.537288	0.892845	-3.81007	2.16667	Glires	5
Wiedomys_pyrrhorhinos	7	12	7	26	19	0.931699	0.9669	0.569869	0.946987	-4.04888	1.71429	Glires	5
Juliomys_pictipes	7	13	6	26	19	0.907889	0.942191	0.537288	0.892845	-3.81007	2.16667	Glires	5
Abrothrix_olivaceus	7	13	6	26	19	0.907889	0.942191	0.537288	0.892845	-3.81007	2.16667	Glires	5
Abrothrix_andinus	7	13	6	26	19	0.907889	0.942191	0.537288	0.892845	-3.81007	2.16667	Glires	5
Abrothrix_jelskii	7	13	6	26	19	0.907889	0.942191	0.537288	0.892845	-3.81007	2.16667	Glires	5
Abrothrix_illuteus	7	13	6	26	19	0.907889	0.942191	0.537288	0.892845	-3.81007	2.16667	Glires	5
Abrothrix_longipilis	7	13	6	26	19	0.907889	0.942191	0.537288	0.892845	-3.81007	2.16667	Glires	5
Abrothrix_sanborni	7	13	6	26	19	0.907889	0.942191	0.537288	0.892845	-3.81007	2.16667	Glires	5
Notiomys_edwardsii	7	13	6	26	19	0.907889	0.942191	0.537288	0.892845	-3.81007	2.16667	Glires	5
Geoxus_valdivianus	7	13	6	26	19	0.907889	0.942191	0.537288	0.892845	-3.81007	2.16667	Glires	5
Chelemys_macronyx	7	13	6	26	19	0.907889	0.942191	0.537288	0.892845	-3.81007	2.16667	Glires	5
Mystromys_albicaudatus	7	13	6	26	19	0.907889	0.942191	0.537288	0.892845	-3.81007	2.16667	Glires	5
Saccostomus_campestris	7	12	7	26	19	0.931699	0.9669	0.569869	0.946987	-4.04888	1.71429	Glires	5
Beamys_hindei	7	13	6	26	19	0.907889	0.942191	0.537288	0.892845	-3.81007	2.16667	Glires	5
Cricetomys_gambianus	7	13	6	26	19	0.907889	0.942191	0.537288	0.892845	-3.81007	2.16667	Glires	5
Brachytarsomys_albicauda	7	13	7	27	20	0.924261	0.954229	0.562915	0.928382	-3.96739	1.85714	Glires	5
Gymnuromys_roberti	7	13	7	27	20	0.924261	0.954229	0.562915	0.928382	-3.96739	1.85714	Glires	5
Eliurus_myoxinus	7	13	7	27	20	0.924261	0.954229	0.562915	0.928382	-3.96739	1.85714	Glires	5
Brachyuromys_ramirohitra	7	13	7	27	20	0.924261	0.954229	0.562915	0.928382	-3.96739	1.85714	Glires	5
Nesomys_rufus	7	13	7	27	20	0.924261	0.954229	0.562915	0.928382	-3.96739	1.85714	Glires	5
Nesomys_audeberti	7	13	7	27	20	0.924261	0.954229	0.562915	0.928382	-3.96739	1.85714	Glires	5
Macrotarsomys_bastardi	7	13	7	27	20	0.924261	0.954229	0.562915	0.928382	-3.96739	1.85714	Glires	5
Calomyscus_baluchi	7	13	6	26	19	0.907889	0.942191	0.537288	0.892845	-3.81007	2.16667	Glires	5
Lophiomys_imhausi	7	16	7	30	23	0.897868	0.91791	0.53955	0.879048	-3.75537	2.28571	Glires	5
Pachyuromys_duprasi	7	12	7	26	19	0.931699	0.9669	0.569869	0.946987	-4.04888	1.71429	Glires	5
Psammomys_obesus	7	12	7	26	19	0.931699	0.9669	0.569869	0.946987	-4.04888	1.71429	Glires	5
Meriones_shawi	7	12	7	26	19	0.931699	0.9669	0.569869	0.946987	-4.04888	1.71429	Glires	5
Meriones_unguiculatus	7	12	7	26	19	0.931699	0.9669	0.569869	0.946987	-4.04888	1.71429	Glires	5
Sekeetamys_calurus	7	12	7	26	19	0.931699	0.9669	0.569869	0.946987	-4.04888	1.71429	Glires	5
Ammodillus_imbellis	7	12	7	26	19	0.931699	0.9669	0.569869	0.946987	-4.04888	1.71429	Glires	5
Microdillus_peeli	7	12	7	26	19	0.931699	0.9669	0.569869	0.946987	-4.04888	1.71429	Glires	5
Gerbillus_cheesmani	7	12	7	26	19	0.931699	0.9669	0.569869	0.946987	-4.04888	1.71429	Glires	5
Taterillus_arenarius	7	12	7	26	19	0.931699	0.9669	0.569869	0.946987	-4.04888	1.71429	Glires	5
Gerbilliscus_nigricaudus	7	12	7	26	19	0.931699	0.9669	0.569869	0.946987	-4.04888	1.71429	Glires	5
Gerbillurus_setzeri	7	12	7	26	19	0.931699	0.9669	0.569869	0.946987	-4.04888	1.71429	Glires	5
Desmodillus_auricularis	7	12	7	26	19	0.931699	0.9669	0.569869	0.946987	-4.04888	1.71429	Glires	5
Tatera_indica	7	12	7	26	19	0.931699	0.9669	0.569869	0.946987	-4.04888	1.71429	Glires	5
Notomys_amplus	7	12	7	26	19	0.931699	0.9669	0.569869	0.946987	-4.04888	1.71429	Glires	5
Conilurus_albipes	7	13	7	27	20	0.924261	0.954229	0.562915	0.928382	-3.96739	1.85714	Glires	5
Hydromys_chrysogaster	7	14	7	28	21	0.916007	0.943584	0.555417	0.913127	-3.89182	2	Glires	5
Mastomys_coucha	7	13	6	26	19	0.907889	0.942191	0.537288	0.892845	-3.81007	2.16667	Glires	5
Mus_musculus	7	12	7	26	19	0.931699	0.9669	0.569869	0.946987	-4.04888	1.71429	Glires	5
Rhabdomys_pumilio	7	12	7	26	19	0.931699	0.9669	0.569869	0.946987	-4.04888	1.71429	Glires	5
Micromys_minutus	7	13	6	26	19	0.907889	0.942191	0.537288	0.892845	-3.81007	2.16667	Glires	5
Maxomys_inflatus	7	13	6	26	19	0.907889	0.942191	0.537288	0.892845	-3.81007	2.16667	Glires	5
Rattus_rattus	7	13	6	26	19	0.907889	0.942191	0.537288	0.892845	-3.81007	2.16667	Glires	5
Rattus_fuscipes	7	13	6	26	19	0.907889	0.942191	0.537288	0.892845	-3.81007	2.16667	Glires	5
Rattus_norvegicus	7	13	6	26	19	0.907889	0.942191	0.537288	0.892845	-3.81007	2.16667	Glires	5
Pedetes_surdaster	7	12	7	26	19	0.931699	0.9669	0.569869	0.946987	-4.04888	1.71429	Glires	5
Pedetes_capensis	7	12	7	26	19	0.931699	0.9669	0.569869	0.946987	-4.04888	1.71429	Glires	5
Anomalurus_pelii	7	15	10	32	25	0.93841	0.954853	0.599997	0.969975	-4.18459	1.5	Glires	5
Anomalurus_derbianus	7	15	10	32	25	0.93841	0.954853	0.599997	0.969975	-4.18459	1.5	Glires	5
Anomalurus_beecrofti	7	16	9	32	25	0.923722	0.939908	0.581197	0.939582	-4.01187	1.77778	Glires	5
Anomalurus_pusillus	7	15	9	31	24	0.93116	0.950129	0.586818	0.950935	-4.07754	1.66667	Glires	5
Microdipodops_pallidus	7	12	7	26	19	0.931699	0.9669	0.569869	0.946987	-4.04888	1.71429	Glires	5
Dipodomys_spectabilis	7	12	7	26	19	0.931699	0.9669	0.569869	0.946987	-4.04888	1.71429	Glires	5
Dipodomys_ordii	7	12	7	26	19	0.931699	0.9669	0.569869	0.946987	-4.04888	1.71429	Glires	5
Dipodomys_heermanni	7	12	7	26	19	0.931699	0.9669	0.569869	0.946987	-4.04888	1.71429	Glires	5
Dipodomys_merriami	7	12	7	26	19	0.931699	0.9669	0.569869	0.946987	-4.04888	1.71429	Glires	5
Thomomys_bulbivorus	7	12	7	26	19	0.931699	0.9669	0.569869	0.946987	-4.04888	1.71429	Glires	5
Thomomys_umbrinus	7	12	7	26	19	0.931699	0.9669	0.569869	0.946987	-4.04888	1.71429	Glires	5
Thomomys_bottae	7	12	7	26	19	0.931699	0.9669	0.569869	0.946987	-4.04888	1.71429	Glires	5
Geomys_pinetis	7	12	7	26	19	0.931699	0.9669	0.569869	0.946987	-4.04888	1.71429	Glires	5
Geomys_bursarius	7	12	7	26	19	0.931699	0.9669	0.569869	0.946987	-4.04888	1.71429	Glires	5
Geomys_arenarius	7	13	6	26	19	0.907889	0.942191	0.537288	0.892845	-3.81007	2.16667	Glires	5
Cratogeomys_castanops	7	12	6	25	18	0.916479	0.954961	0.546054	0.910783	-3.89182	2	Glires	5
Liomys_salvini	7	12	7	26	19	0.931699	0.9669	0.569869	0.946987	-4.04888	1.71429	Glires	5
Heteromys_anomalus	7	12	7	26	19	0.931699	0.9669	0.569869	0.946987	-4.04888	1.71429	Glires	5
Perognathus_fasciatus	7	12	7	26	19	0.931699	0.9669	0.569869	0.946987	-4.04888	1.71429	Glires	5
Castor_fiber	7	14	5	26	19	0.875301	0.908371	0.492693	0.818739	-3.54715	2.8	Glires	5
Castor_canadensis	7	14	5	26	19	0.875301	0.908371	0.492693	0.818739	-3.54715	2.8	Glires	5
Hydrodamalis_gigas	7	17	3	27	20	0.767983	0.792884	0.351939	0.580433	-2.81223	5.66667	Afrotheria	1
Trichechus_manatus	6	17	2	25	19	0.689045	0.717978	0.270614	0.449696	-2.37627	8.5	Afrotheria	1
Trichechus_senegalensis	6	17	2	25	19	0.689045	0.717978	0.270614	0.449696	-2.37627	8.5	Afrotheria	1
Trichechus_inunguis	6	15	2	23	17	0.714565	0.751407	0.28898	0.486467	-2.51231	7.5	Afrotheria	1
Dugong_dugon	7	19	3	29	22	0.744836	0.764708	0.333615	0.545019	-2.69392	6.33333	Afrotheria	1
Loxodonta_africana	7	20	3	30	23	0.733523	0.749896	0.325187	0.529802	-2.63906	6.66667	Afrotheria	1
Elephas_maximus	7	19	4	30	23	0.798565	0.81987	0.40444	0.660724	-3.05505	4.5	Afrotheria	1
Procavia_capensis	7	21	8	36	29	0.866939	0.872805	0.526631	0.840682	-3.61349	2.625	Afrotheria	1
Heterohyrax_brucei	7	22	7	36	29	0.838839	0.844514	0.491748	0.784998	-3.4281	3.14286	Afrotheria	1
Dendrohyrax_validus	7	23	8	38	31	0.848204	0.850966	0.512289	0.813527	-3.51995	2.875	Afrotheria	1
Dendrohyrax_dorsalis	7	20	8	35	28	0.876308	0.884919	0.533912	0.853902	-3.66356	2.5	Afrotheria	1
Dendrohyrax_arboreus	7	22	7	36	29	0.838839	0.844514	0.491748	0.784998	-3.4281	3.14286	Afrotheria	1
Orycteropus_afer	7	13	8	28	21	0.935993	0.964172	0.582065	0.956938	-4.10328	1.625	Afrotheria	1
Rhynchocyon_cirnei	7	13	7	27	20	0.924261	0.954229	0.562915	0.928382	-3.96739	1.85714	Afrotheria	1
Rhynchocyon_chrysopygus	7	13	8	28	21	0.935993	0.964172	0.582065	0.956938	-4.10328	1.625	Afrotheria	1
Rhynchocyon_petersi	7	13	8	28	21	0.935993	0.964172	0.582065	0.956938	-4.10328	1.625	Afrotheria	1
Elephantulus_myurus	7	13	7	27	20	0.924261	0.954229	0.562915	0.928382	-3.96739	1.85714	Afrotheria	1
Elephantulus_edwardii	7	14	6	27	20	0.898589	0.927725	0.528257	0.871223	-3.73426	2.33333	Afrotheria	1
Macroscelides_proboscideus	7	14	6	27	20	0.898589	0.927725	0.528257	0.871223	-3.73426	2.33333	Afrotheria	1
Petrodromus_tetradactylus	7	13	7	27	20	0.924261	0.954229	0.562915	0.928382	-3.96739	1.85714	Afrotheria	1
Elephantulus_rufescens	7	13	7	27	20	0.924261	0.954229	0.562915	0.928382	-3.96739	1.85714	Afrotheria	1
Elephantulus_brachyrhynchus	7	14	6	27	20	0.898589	0.927725	0.528257	0.871223	-3.73426	2.33333	Afrotheria	1
Elephantulus_intufi	7	13	7	27	20	0.924261	0.954229	0.562915	0.928382	-3.96739	1.85714	Afrotheria	1
Elephantulus_rupestris	7	14	6	27	20	0.898589	0.927725	0.528257	0.871223	-3.73426	2.33333	Afrotheria	1
Potamogale_velox	7	17	5	29	22	0.842735	0.865219	0.462664	0.755844	-3.3468	3.4	Afrotheria	1
Limnogale_mergulus	7	17	5	29	22	0.842735	0.865219	0.462664	0.755844	-3.3468	3.4	Afrotheria	1
Microgale_talazaci	7	16	7	30	23	0.897868	0.91791	0.53955	0.879048	-3.75537	2.28571	Afrotheria	1
Microgale_longicaudata	7	17	6	30	23	0.868292	0.887673	0.500972	0.816195	-3.53497	2.83333	Afrotheria	1
Microgale_cowani	7	17	5	29	22	0.842735	0.865219	0.462664	0.755844	-3.3468	3.4	Afrotheria	1
Oryzorictes_tetradactylus	7	17	5	29	22	0.842735	0.865219	0.462664	0.755844	-3.3468	3.4	Afrotheria	1
Tenrec_ecaudatus	7	19	5	31	24	0.820635	0.837353	0.444056	0.719591	-3.23143	3.8	Afrotheria	1
Hemicentetes_semispinosus	7	17	4	28	21	0.810052	0.834439	0.414143	0.680868	-3.11482	4.25	Afrotheria	1
Setifer_setosus	7	16	7	30	23	0.897868	0.91791	0.53955	0.879048	-3.75537	2.28571	Afrotheria	1
Echinops_telfairi	7	16	4	27	20	0.821573	0.848211	0.424285	0.699748	-3.17805	4	Afrotheria	1
Eremitalpa_granti	7	17	2	26	19	0.713012	0.739951	0.270614	0.449696	-2.37627	8.5	Afrotheria	1
Amblysomus_hottentotus	7	19	3	29	22	0.744836	0.764708	0.333615	0.545019	-2.69392	6.33333	Afrotheria	1
Calcochloris_obtusirostris	7	19	3	29	22	0.744836	0.764708	0.333615	0.545019	-2.69392	6.33333	Afrotheria	1
Chrysospalax_trevelyani	7	19	3	29	22	0.744836	0.764708	0.333615	0.545019	-2.69392	6.33333	Afrotheria	1
Chrysochloris_asiatica	7	19	3	29	22	0.744836	0.764708	0.333615	0.545019	-2.69392	6.33333	Afrotheria	1
Dasypus_hybridus	7	9	5	21	14	0.917412	0.972784	0.542993	0.933791	-3.99922	1.8	Xenarthra	10
Dasypus_novemcinctus	7	10	5	22	15	0.911551	0.963387	0.533825	0.913092	-3.89182	2	Xenarthra	10
Dasypus_kappleri	7	9	5	21	14	0.917412	0.972784	0.542993	0.933791	-3.99922	1.8	Xenarthra	10
Dasypus_septemcinctus	7	10	4	21	14	0.884405	0.937785	0.493482	0.848648	-3.66356	2.5	Xenarthra	10
Zaedyus_pichiy	7	11	3	21	14	0.836234	0.886706	0.421225	0.724386	-3.26853	3.66667	Xenarthra	10
Euphractus_sexcinctus	7	11	3	21	14	0.836234	0.886706	0.421225	0.724386	-3.26853	3.66667	Xenarthra	10
Chaetophractus_vellerosus	7	11	3	21	14	0.836234	0.886706	0.421225	0.724386	-3.26853	3.66667	Xenarthra	10
Chaetophractus_villosus	7	11	3	21	14	0.836234	0.886706	0.421225	0.724386	-3.26853	3.66667	Xenarthra	10
Chlamyphorus_truncatus	7	11	3	21	14	0.836234	0.886706	0.421225	0.724386	-3.26853	3.66667	Xenarthra	10
Tolypeutes_matacus	7	11	3	21	14	0.836234	0.886706	0.421225	0.724386	-3.26853	3.66667	Xenarthra	10
Priodontes_maximus	7	11	4	22	15	0.875712	0.92551	0.481261	0.823183	-3.56568	2.75	Xenarthra	10
Cabassous_unicinctus	7	12	3	22	15	0.825775	0.872734	0.40802	0.697907	-3.17805	4	Xenarthra	10
Tamandua_tetradactyla	7	17	3	27	20	0.767983	0.792884	0.351939	0.580433	-2.81223	5.66667	Xenarthra	10
Tamandua_mexicana	7	17	3	27	20	0.767983	0.792884	0.351939	0.580433	-2.81223	5.66667	Xenarthra	10
Myrmecophaga_tridactyla	7	16	2	25	18	0.724537	0.75496	0.279469	0.466136	-2.44235	8	Xenarthra	10
Cyclopes_didactylus	7	15	2	24	17	0.736131	0.769109	0.28898	0.486467	-2.51231	7.5	Xenarthra	10
Choloepus_hoffmanni	6	23	3	32	26	0.674384	0.6862	0.302433	0.486667	-2.48852	7.66667	Xenarthra	10
Choloepus_didactylus	7	24	4	35	28	0.732807	0.740007	0.354534	0.567018	-2.75154	6	Xenarthra	10
Bradypus_tridactylus	9	15	4	28	19	0.857521	0.883337	0.434872	0.722653	-3.24519	3.75	Xenarthra	10
Bradypus_variegatus	9	15	4	28	19	0.857521	0.883337	0.434872	0.722653	-3.24519	3.75	Xenarthra	10
Rhyncholestes_raphanurus	7	13	6	26	19	0.907889	0.942191	0.537288	0.892845	-3.81007	2.16667	Marsupialia	6
Caenolestes_fuliginosus	7	13	6	26	19	0.907889	0.942191	0.537288	0.892845	-3.81007	2.16667	Marsupialia	6
Glironia_venusta	7	13	6	26	19	0.907889	0.942191	0.537288	0.892845	-3.81007	2.16667	Marsupialia	6
Monodelphis_domestica	7	14	6	27	20	0.898589	0.927725	0.528257	0.871223	-3.73426	2.33333	Marsupialia	6
Gracilinanus_microtarsus	7	13	5	25	18	0.885552	0.922735	0.503099	0.839137	-3.62331	2.6	Marsupialia	6
Metachirus_nudicaudatus	7	13	6	26	19	0.907889	0.942191	0.537288	0.892845	-3.81007	2.16667	Marsupialia	6
Didelphis_virginiana	7	13	6	26	19	0.907889	0.942191	0.537288	0.892845	-3.81007	2.16667	Marsupialia	6
Didelphis_marsupialis	7	13	6	26	19	0.907889	0.942191	0.537288	0.892845	-3.81007	2.16667	Marsupialia	6
Didelphis_albiventris	7	13	6	26	19	0.907889	0.942191	0.537288	0.892845	-3.81007	2.16667	Marsupialia	6
Chironectes_minimus	7	13	6	26	19	0.907889	0.942191	0.537288	0.892845	-3.81007	2.16667	Marsupialia	6
Caluromys_philander	7	13	6	26	19	0.907889	0.942191	0.537288	0.892845	-3.81007	2.16667	Marsupialia	6
Dromiciops_gliroides	7	13	5	25	18	0.885552	0.922735	0.503099	0.839137	-3.62331	2.6	Marsupialia	6
Notoryctes_typhlops	7	15	4	26	19	0.833047	0.864521	0.434872	0.722653	-3.24519	3.75	Marsupialia	6
Notoryctes_caurinus	7	15	4	26	19	0.833047	0.864521	0.434872	0.722653	-3.24519	3.75	Marsupialia	6
Macrotis_lagotis	7	13	6	26	19	0.907889	0.942191	0.537288	0.892845	-3.81007	2.16667	Marsupialia	6
Isoodon_macrourus	7	13	6	26	19	0.907889	0.942191	0.537288	0.892845	-3.81007	2.16667	Marsupialia	6
Isoodon_obesulus	7	13	6	26	19	0.907889	0.942191	0.537288	0.892845	-3.81007	2.16667	Marsupialia	6
Perameles_gunnii	7	13	6	26	19	0.907889	0.942191	0.537288	0.892845	-3.81007	2.16667	Marsupialia	6
Perameles_nasuta	7	13	6	26	19	0.907889	0.942191	0.537288	0.892845	-3.81007	2.16667	Marsupialia	6
Sarcophilus_harrisii	7	13	6	26	19	0.907889	0.942191	0.537288	0.892845	-3.81007	2.16667	Marsupialia	6
Dasyurus_maculatus	7	13	6	26	19	0.907889	0.942191	0.537288	0.892845	-3.81007	2.16667	Marsupialia	6
Dasyurus_viverrinus	7	13	6	26	19	0.907889	0.942191	0.537288	0.892845	-3.81007	2.16667	Marsupialia	6
Dasyuroides_byrnei	7	13	6	26	19	0.907889	0.942191	0.537288	0.892845	-3.81007	2.16667	Marsupialia	6
Dasycercus_cristicauda	7	13	6	26	19	0.907889	0.942191	0.537288	0.892845	-3.81007	2.16667	Marsupialia	6
Antechinus_flavipes	7	13	6	26	19	0.907889	0.942191	0.537288	0.892845	-3.81007	2.16667	Marsupialia	6
Thylacinus_cynocephalus	7	13	6	26	19	0.907889	0.942191	0.537288	0.892845	-3.81007	2.16667	Marsupialia	6
Myrmecobius_fasciatus	7	13	6	26	19	0.907889	0.942191	0.537288	0.892845	-3.81007	2.16667	Marsupialia	6
Phascolarctos_cinereus	7	11	8	26	19	0.947293	0.983084	0.591209	0.982449	-4.27287	1.375	Marsupialia	6
Vombatus_ursinus	7	15	4	26	19	0.833047	0.864521	0.434872	0.722653	-3.24519	3.75	Marsupialia	6
Lasiorhinus_latifrons	7	13	6	26	19	0.907889	0.942191	0.537288	0.892845	-3.81007	2.16667	Marsupialia	6
Cercartetus_concinnus	7	13	6	26	19	0.907889	0.942191	0.537288	0.892845	-3.81007	2.16667	Marsupialia	6
Trichosurus_vulpecula	7	13	6	26	19	0.907889	0.942191	0.537288	0.892845	-3.81007	2.16667	Marsupialia	6
Spilocuscus_maculatus	7	13	6	26	19	0.907889	0.942191	0.537288	0.892845	-3.81007	2.16667	Marsupialia	6
Phalanger_sericeus	7	13	6	26	19	0.907889	0.942191	0.537288	0.892845	-3.81007	2.16667	Marsupialia	6
Phalanger_orientalis	7	13	6	26	19	0.907889	0.942191	0.537288	0.892845	-3.81007	2.16667	Marsupialia	6
Hypsiprymnodon_moschatus	7	13	6	26	19	0.907889	0.942191	0.537288	0.892845	-3.81007	2.16667	Marsupialia	6
Thylogale_billardierii	7	13	6	26	19	0.907889	0.942191	0.537288	0.892845	-3.81007	2.16667	Marsupialia	6
Petrogale_lateralis	7	13	6	26	19	0.907889	0.942191	0.537288	0.892845	-3.81007	2.16667	Marsupialia	6
Petrogale_penicillata	7	13	6	26	19	0.907889	0.942191	0.537288	0.892845	-3.81007	2.16667	Marsupialia	6
Dendrolagus_goodfellowi	7	13	6	26	19	0.907889	0.942191	0.537288	0.892845	-3.81007	2.16667	Marsupialia	6
Dendrolagus_matschiei	7	13	6	26	19	0.907889	0.942191	0.537288	0.892845	-3.81007	2.16667	Marsupialia	6
Dendrolagus_bennettianus	7	13	6	26	19	0.907889	0.942191	0.537288	0.892845	-3.81007	2.16667	Marsupialia	6
Dendrolagus_lumholtzi	7	13	6	26	19	0.907889	0.942191	0.537288	0.892845	-3.81007	2.16667	Marsupialia	6
Macropus_fuliginosus	7	13	6	26	19	0.907889	0.942191	0.537288	0.892845	-3.81007	2.16667	Marsupialia	6
Macropus_giganteus	7	13	6	26	19	0.907889	0.942191	0.537288	0.892845	-3.81007	2.16667	Marsupialia	6
Macropus_antilopinus	7	13	6	26	19	0.907889	0.942191	0.537288	0.892845	-3.81007	2.16667	Marsupialia	6
Macropus_robustus	7	13	6	26	19	0.907889	0.942191	0.537288	0.892845	-3.81007	2.16667	Marsupialia	6
Macropus_rufus	7	13	6	26	19	0.907889	0.942191	0.537288	0.892845	-3.81007	2.16667	Marsupialia	6
Macropus_rufogriseus	7	13	6	26	19	0.907889	0.942191	0.537288	0.892845	-3.81007	2.16667	Marsupialia	6
Macropus_eugenii	7	13	6	26	19	0.907889	0.942191	0.537288	0.892845	-3.81007	2.16667	Marsupialia	6
Macropus_agilis	7	13	6	26	19	0.907889	0.942191	0.537288	0.892845	-3.81007	2.16667	Marsupialia	6
Macropus_parryi	7	13	6	26	19	0.907889	0.942191	0.537288	0.892845	-3.81007	2.16667	Marsupialia	6
Macropus_parma	7	13	6	26	19	0.907889	0.942191	0.537288	0.892845	-3.81007	2.16667	Marsupialia	6
Macropus_irma	7	13	6	26	19	0.907889	0.942191	0.537288	0.892845	-3.81007	2.16667	Marsupialia	6
Dendrolagus_ursinus	7	13	6	26	19	0.907889	0.942191	0.537288	0.892845	-3.81007	2.16667	Marsupialia	6
Potorous_longipes	7	13	6	26	19	0.907889	0.942191	0.537288	0.892845	-3.81007	2.16667	Marsupialia	6
Potorous_tridactylus	7	13	6	26	19	0.907889	0.942191	0.537288	0.892845	-3.81007	2.16667	Marsupialia	6
Bettongia_penicillata	7	13	6	26	19	0.907889	0.942191	0.537288	0.892845	-3.81007	2.16667	Marsupialia	6
Bettongia_gaimardi	7	13	6	26	19	0.907889	0.942191	0.537288	0.892845	-3.81007	2.16667	Marsupialia	6
Aepyprymnus_rufescens	7	13	6	26	19	0.907889	0.942191	0.537288	0.892845	-3.81007	2.16667	Marsupialia	6
Pseudocheirus_peregrinus	7	13	6	26	19	0.907889	0.942191	0.537288	0.892845	-3.81007	2.16667	Marsupialia	6
Petauroides_volans	7	12	7	26	19	0.931699	0.9669	0.569869	0.946987	-4.04888	1.71429	Marsupialia	6
Petaurus_australis	7	13	6	26	19	0.907889	0.942191	0.537288	0.892845	-3.81007	2.16667	Marsupialia	6
Petaurus_norfolcensis	7	13	6	26	19	0.907889	0.942191	0.537288	0.892845	-3.81007	2.16667	Marsupialia	6
Petaurus_breviceps	7	13	6	26	19	0.907889	0.942191	0.537288	0.892845	-3.81007	2.16667	Marsupialia	6
[truncated: 32 more columns]

## Sheet: Supplementary Data 2
LITERATURE SOURCES CONSULTED IN THIS STUDY
Species
Zaglossus_bruijnii	Wheelhouse, J., Vogelnest, L. & Nicoll, R. G. (2021). Skeletal radiographic anatomy of echidnas: insights into unusual mammals. J. Mammal. https://doi.org/10.1093/jmammal/gyab138 (2021).
Tachyglossus_aculeatus	Asher, R. J., Lin, K. H., Kardjilov, N. & Hautier, L. Variability and constraint in the mammalian vertebral column. J. Evol. Biol. 24, 1080-1090 (2011).
Ornithorhynchus_anatinus	Asher, R. J., Lin, K. H., Kardjilov, N. & Hautier, L. Variability and constraint in the mammalian vertebral column. J. Evol. Biol. 24, 1080-1090 (2011).
Solenodon_paradoxus	Derbridge, J. J., Posthumus, E. E., Chen, H. L., & Koprowski, J. L. (2015). Solenodon paradoxus (Soricomorpha: Solenodontidae). Mamm. Spec. 47, 100-106 (2015)
Solenodon_cubanus	Sánchez‐Villagra, M. R., Narita, Y. & Kuratani, S. Thoracolumbar vertebral number: the first skeletal synapomorphy for afrotherian mammals. Syst. Biodiv. 5, 1–7 (2007).
Galemys_pyrenaicus	Sánchez‐Villagra, M. R., Narita, Y. & Kuratani, S. Thoracolumbar vertebral number: the first skeletal synapomorphy for afrotherian mammals. Syst. Biodiv. 5, 1–7 (2007).
Scapanus_latimanus	Verts, B. J. & Carraway, L. N. Scapanus latimanus. Mamm. Spec. 666, 1-7 (2001).
Scalopus_aquaticus	Williams, S. A., Spear, J. K., Petrullo, L., Goldstein, D. M., Lee, A. B., Peterson, A. L., Miano, D. A., Kaczmarek, E. B. & Shattuck, M. R. Increased variation in numbers of presacral vertebrae in suspensory mammals. Nat. Ecol. Evol. 3, 949–956 (2019).
Talpa_europaea	Asher, R. J., Lin, K. H., Kardjilov, N. & Hautier, L. Variability and constraint in the mammalian vertebral column. J. Evol. Biol. 24, 1080-1090 (2011).
Euroscaptor_mizura	Kawada, S. I., Son, N. T. & Can, D. N. A new species of mole of the genus Euroscaptor (Soricomorpha, Talpidae) from northern Vietnam. J. Mammal. 93, 839-850 (2012).
Euroscaptor_micrura	Kawada, S. I., Son, N. T. & Can, D. N. A new species of mole of the genus Euroscaptor (Soricomorpha, Talpidae) from northern Vietnam. J. Mammal. 93, 839-850 (2012).
Mogera_tokudae	Abe, H. (1995). Revision of the Asian moles of the genus Mogera. J. Mammal. Soc. Japan 20, 51-68 (1995).
Mogera_imaizumii	Abe, H. (1995). Revision of the Asian moles of the genus Mogera. J. Mammal. Soc. Japan 20, 51-68 (1995).
Mogera_wogura	Sánchez‐Villagra, M. R., Narita, Y. & Kuratani, S. Thoracolumbar vertebral number: the first skeletal synapomorphy for afrotherian mammals. Syst. Biodiv. 5, 1–7 (2007).
Euroscaptor_subanura	Kawada, S. I., Son, N. T. & Can, D. N. A new species of mole of the genus Euroscaptor (Soricomorpha, Talpidae) from northern Vietnam. J. Mammal. 93, 839-850 (2012).
Condylura_cristata	Hautier, L., Weisbecker, V., Sánchez-Villagra, M. R., Goswami, A. & Asher, R. J. Skeletal development in sloths and the evolution of mammalian vertebral patterning. Proc. Natl. Acad. Sci. USA 107, 18903–18908 (2010).
Hylomys_suillus	Sánchez‐Villagra, M. R., Narita, Y. & Kuratani, S. Thoracolumbar vertebral number: the first skeletal synapomorphy for afrotherian mammals. Syst. Biodiv. 5, 1–7 (2007).
Echinosorex_gymnura	Sánchez‐Villagra, M. R., Narita, Y. & Kuratani, S. Thoracolumbar vertebral number: the first skeletal synapomorphy for afrotherian mammals. Syst. Biodiv. 5, 1–7 (2007).
Erinaceus_europaeus	Asher, R. J., Lin, K. H., Kardjilov, N. & Hautier, L. Variability and constraint in the mammalian vertebral column. J. Evol. Biol. 24, 1080-1090 (2011).
Paraechinus_micropus	Goodarzi, N. (2018). Skeletal morphology of forelimb of Paraechinus hypomelas (Brandt, 1836); a radiographic and 3D computed tomographic study. Online J. Vet. Res. 22, 1003-1013 (2018).
Hemiechinus_auritus	Sánchez‐Villagra, M. R., Narita, Y. & Kuratani, S. Thoracolumbar vertebral number: the first skeletal synapomorphy for afrotherian mammals. Syst. Biodiv. 5, 1–7 (2007).
Atelerix_algirus	Sánchez‐Villagra, M. R., Narita, Y. & Kuratani, S. Thoracolumbar vertebral number: the first skeletal synapomorphy for afrotherian mammals. Syst. Biodiv. 5, 1–7 (2007).
Scutisorex_somereni	Williams, S. A., Spear, J. K., Petrullo, L., Goldstein, D. M., Lee, A. B., Peterson, A. L., Miano, D. A., Kaczmarek, E. B. & Shattuck, M. R. Increased variation in numbers of presacral vertebrae in suspensory mammals. Nat. Ecol. Evol. 3, 949–956 (2019).
Suncus_madagascariensis	Asher, R. J., Bennett, N. & Lehmann, T. The new framework for understanding placental mammal evolution. Bioessays 31, 853–864 (2009).
Crocidura_crenata	Stanley, W. T., Robbins, L. W., Malekani, J. M., Mbalitini, S. G., Migurimu, D. A., Mukinzi, J. C., Hulselmans, J., Prévot, V., Verheyen, E., Hutterer, R. & Doty, J. B. A new hero emerges: another exceptional mammalian spine and its potential adaptive significance. Biol. Lett. 9, p.20130486 (2013).
Crocidura_canariensis	Stanley, W. T., Robbins, L. W., Malekani, J. M., Mbalitini, S. G., Migurimu, D. A., Mukinzi, J. C., Hulselmans, J., Prévot, V., Verheyen, E., Hutterer, R. & Doty, J. B. A new hero emerges: another exceptional mammalian spine and its potential adaptive significance. Biol. Lett. 9, p.20130486 (2013).
Sorex_araneus	Asher, R. J., Lin, K. H., Kardjilov, N. & Hautier, L. Variability and constraint in the mammalian vertebral column. J. Evol. Biol. 24, 1080-1090 (2011).
Sorex_minutus	Narita, Y. & Kuratani, S. Evolution of the vertebral formulae in mammals: a perspective on developmental constraints. J. Exper. Zool. B: Mol. Dev. Evol. 304, 91–106 (2005).
Cryptotis_parva	Asher, R. J., Lin, K. H., Kardjilov, N. & Hautier, L. Variability and constraint in the mammalian vertebral column. J. Evol. Biol. 24, 1080-1090 (2011).
Blarina_hylophaga	Asher, R. J., Lin, K. H., Kardjilov, N. & Hautier, L. Variability and constraint in the mammalian vertebral column. J. Evol. Biol. 24, 1080-1090 (2011).
Notiosorex_crawfordi	Armstrong, D. M, & Jones, J. K. Notiosorex crawfordi. Mamm. Spec. 17, 1-5 (1972).
Smutsia_gigantea	Williams, S. A., Spear, J. K., Petrullo, L., Goldstein, D. M., Lee, A. B., Peterson, A. L., Miano, D. A., Kaczmarek, E. B. & Shattuck, M. R. Increased variation in numbers of presacral vertebrae in suspensory mammals. Nat. Ecol. Evol. 3, 949–956 (2019).
Phataginus_tricuspis	Williams, S. A., Spear, J. K., Petrullo, L., Goldstein, D. M., Lee, A. B., Peterson, A. L., Miano, D. A., Kaczmarek, E. B. & Shattuck, M. R. Increased variation in numbers of presacral vertebrae in suspensory mammals. Nat. Ecol. Evol. 3, 949–956 (2019).
Manis_pentadactyla	Williams, S. A., Spear, J. K., Petrullo, L., Goldstein, D. M., Lee, A. B., Peterson, A. L., Miano, D. A., Kaczmarek, E. B. & Shattuck, M. R. Increased variation in numbers of presacral vertebrae in suspensory mammals. Nat. Ecol. Evol. 3, 949–956 (2019).
Urocyon_cinereoargenteus	Sheldon, J. W. Wild dogs: the natural history of the nondomestic Canidae (Elsevier, 2013).
Vulpes_lagopus	Sheldon, J. W. Wild dogs: the natural history of the nondomestic Canidae (Elsevier, 2013).
Vulpes_zerda	Williams, S. A., Spear, J. K., Petrullo, L., Goldstein, D. M., Lee, A. B., Peterson, A. L., Miano, D. A., Kaczmarek, E. B. & Shattuck, M. R. Increased variation in numbers of presacral vertebrae in suspensory mammals. Nat. Ecol. Evol. 3, 949–956 (2019).
Vulpes_vulpes	Owen, R. Descriptive catalogue of the osteological series contained in the museum of the Royal College of Surgeons of England. Vol. 2 (Taylor and Francis, 1853).
Otocyon_megalotis	Sánchez‐Villagra, M. R., Narita, Y. & Kuratani, S. Thoracolumbar vertebral number: the first skeletal synapomorphy for afrotherian mammals. Syst. Biodiv. 5, 1–7 (2007).
Nyctereutes_procyonoides	Sheldon, J. W. Wild dogs: the natural history of the nondomestic Canidae (Elsevier, 2013).
Lycaon_pictus	Williams, S. A., Spear, J. K., Petrullo, L., Goldstein, D. M., Lee, A. B., Peterson, A. L., Miano, D. A., Kaczmarek, E. B. & Shattuck, M. R. Increased variation in numbers of presacral vertebrae in suspensory mammals. Nat. Ecol. Evol. 3, 949–956 (2019).
Chrysocyon_brachyurus	Galis, F., Carrier, D. R., van Alphen, J., van der Mije, S. D., Van Dooren, T. J., Metz, J. A. & ten Broek, C. M. Fast running restricts evolutionary change of the vertebral column in mammals. Proc. Natl. Acad. Sci. USA 111, 11401–11406 (2014).
Canis_mesomelas	Williams, S. A., Spear, J. K., Petrullo, L., Goldstein, D. M., Lee, A. B., Peterson, A. L., Miano, D. A., Kaczmarek, E. B. & Shattuck, M. R. Increased variation in numbers of presacral vertebrae in suspensory mammals. Nat. Ecol. Evol. 3, 949–956 (2019).
Canis_simensis	Williams, S. A., Spear, J. K., Petrullo, L., Goldstein, D. M., Lee, A. B., Peterson, A. L., Miano, D. A., Kaczmarek, E. B. & Shattuck, M. R. Increased variation in numbers of presacral vertebrae in suspensory mammals. Nat. Ecol. Evol. 3, 949–956 (2019).
Canis_latrans	Williams, S. A., Spear, J. K., Petrullo, L., Goldstein, D. M., Lee, A. B., Peterson, A. L., Miano, D. A., Kaczmarek, E. B. & Shattuck, M. R. Increased variation in numbers of presacral vertebrae in suspensory mammals. Nat. Ecol. Evol. 3, 949–956 (2019).
Canis_aureus	Williams, S. A., Spear, J. K., Petrullo, L., Goldstein, D. M., Lee, A. B., Peterson, A. L., Miano, D. A., Kaczmarek, E. B. & Shattuck, M. R. Increased variation in numbers of presacral vertebrae in suspensory mammals. Nat. Ecol. Evol. 3, 949–956 (2019).
Canis_lupus	Owen, R. Descriptive catalogue of the osteological series contained in the museum of the Royal College of Surgeons of England. Vol. 2 (Taylor and Francis, 1853).
Cuon_alpinus	Sheldon, J. W. Wild dogs: the natural history of the nondomestic Canidae (Elsevier, 2013).
Canis_adustus	Williams, S. A., Spear, J. K., Petrullo, L., Goldstein, D. M., Lee, A. B., Peterson, A. L., Miano, D. A., Kaczmarek, E. B. & Shattuck, M. R. Increased variation in numbers of presacral vertebrae in suspensory mammals. Nat. Ecol. Evol. 3, 949–956 (2019).
Pseudalopex_gymnocercus	Williams, S. A., Spear, J. K., Petrullo, L., Goldstein, D. M., Lee, A. B., Peterson, A. L., Miano, D. A., Kaczmarek, E. B. & Shattuck, M. R. Increased variation in numbers of presacral vertebrae in suspensory mammals. Nat. Ecol. Evol. 3, 949–956 (2019).
Speothos_venaticus	Sheldon, J. W. Wild dogs: the natural history of the nondomestic Canidae (Elsevier, 2013).
Cerdocyon_thous	Williams, S. A., Spear, J. K., Petrullo, L., Goldstein, D. M., Lee, A. B., Peterson, A. L., Miano, D. A., Kaczmarek, E. B. & Shattuck, M. R. Increased variation in numbers of presacral vertebrae in suspensory mammals. Nat. Ecol. Evol. 3, 949–956 (2019).
Neomonachus_tropicalis	Adam, P. J. Monachus tropicalis. Mamm. Spec. 747, 1-9 (2004).
Monachus_monachus	Sánchez‐Villagra, M. R., Narita, Y. & Kuratani, S. Thoracolumbar vertebral number: the first skeletal synapomorphy for afrotherian mammals. Syst. Biodiv. 5, 1–7 (2007).
Mirounga_leonina	Pierce, S. E., Clack, J. A. & Hutchinson, J. R. Comparative axial morphology in pinnipeds and its correlation with aquatic locomotory behaviour. J. Anat. 219, 502-514 (2011).
Mirounga_angustirostris	Pierce, S. E., Clack, J. A. & Hutchinson, J. R. Comparative axial morphology in pinnipeds and its correlation with aquatic locomotory behaviour. J. Anat. 219, 502-514 (2011).
Lobodon_carcinophaga	Pierce, S. E., Clack, J. A. & Hutchinson, J. R. Comparative axial morphology in pinnipeds and its correlation with aquatic locomotory behaviour. J. Anat. 219, 502-514 (2011).
Leptonychotes_weddellii	Pierce, S. E., Clack, J. A. & Hutchinson, J. R. Comparative axial morphology in pinnipeds and its correlation with aquatic locomotory behaviour. J. Anat. 219, 502-514 (2011).
Ommatophoca_rossii	Pierce, S. E., Clack, J. A. & Hutchinson, J. R. Comparative axial morphology in pinnipeds and its correlation with aquatic locomotory behaviour. J. Anat. 219, 502-514 (2011).
Hydrurga_leptonyx	Pierce, S. E., Clack, J. A. & Hutchinson, J. R. Comparative axial morphology in pinnipeds and its correlation with aquatic locomotory behaviour. J. Anat. 219, 502-514 (2011).
Erignathus_barbatus	Pierce, S. E., Clack, J. A. & Hutchinson, J. R. Comparative axial morphology in pinnipeds and its correlation with aquatic locomotory behaviour. J. Anat. 219, 502-514 (2011).
Pagophilus_groenlandicus	Narita, Y. & Kuratani, S. Evolution of the vertebral formulae in mammals: a perspective on developmental constraints. J. Exper. Zool. B: Mol. Dev. Evol. 304, 91–106 (2005).
Phoca_vitulina	Pierce, S. E., Clack, J. A. & Hutchinson, J. R. Comparative axial morphology in pinnipeds and its correlation with aquatic locomotory behaviour. J. Anat. 219, 502-514 (2011).
Pusa_hispida	Pierce, S. E., Clack, J. A. & Hutchinson, J. R. Comparative axial morphology in pinnipeds and its correlation with aquatic locomotory behaviour. J. Anat. 219, 502-514 (2011).
Halichoerus_grypus	Pierce, S. E., Clack, J. A. & Hutchinson, J. R. Comparative axial morphology in pinnipeds and its correlation with aquatic locomotory behaviour. J. Anat. 219, 502-514 (2011).
Cystophora_cristata	Pierce, S. E., Clack, J. A. & Hutchinson, J. R. Comparative axial morphology in pinnipeds and its correlation with aquatic locomotory behaviour. J. Anat. 219, 502-514 (2011).
Odobenus_rosmarus	Williams, S. A., Spear, J. K., Petrullo, L., Goldstein, D. M., Lee, A. B., Peterson, A. L., Miano, D. A., Kaczmarek, E. B. & Shattuck, M. R. Increased variation in numbers of presacral vertebrae in suspensory mammals. Nat. Ecol. Evol. 3, 949–956 (2019).
Callorhinus_ursinus	Sánchez‐Villagra, M. R., Narita, Y. & Kuratani, S. Thoracolumbar vertebral number: the first skeletal synapomorphy for afrotherian mammals. Syst. Biodiv. 5, 1–7 (2007).
Zalophus_californianus	Williams, S. A., Spear, J. K., Petrullo, L., Goldstein, D. M., Lee, A. B., Peterson, A. L., Miano, D. A., Kaczmarek, E. B. & Shattuck, M. R. Increased variation in numbers of presacral vertebrae in suspensory mammals. Nat. Ecol. Evol. 3, 949–956 (2019).
Zalophus_japonicus	Pierce, S. E., Clack, J. A. & Hutchinson, J. R. Comparative axial morphology in pinnipeds and its correlation with aquatic locomotory behaviour. J. Anat. 219, 502-514 (2011).
Eumetopias_jubatus	Sánchez‐Villagra, M. R., Narita, Y. & Kuratani, S. Thoracolumbar vertebral number: the first skeletal synapomorphy for afrotherian mammals. Syst. Biodiv. 5, 1–7 (2007).
Arctocephalus_pusillus	Pierce, S. E., Clack, J. A. & Hutchinson, J. R. Comparative axial morphology in pinnipeds and its correlation with aquatic locomotory behaviour. J. Anat. 219, 502-514 (2011).
Neophoca_cinerea	Pierce, S. E., Clack, J. A. & Hutchinson, J. R. Comparative axial morphology in pinnipeds and its correlation with aquatic locomotory behaviour. J. Anat. 219, 502-514 (2011).
Otaria_bryonia	Pierce, S. E., Clack, J. A. & Hutchinson, J. R. Comparative axial morphology in pinnipeds and its correlation with aquatic locomotory behaviour. J. Anat. 219, 502-514 (2011).
Arctocephalus_tropicalis	Pierce, S. E., Clack, J. A. & Hutchinson, J. R. Comparative axial morphology in pinnipeds and its correlation with aquatic locomotory behaviour. J. Anat. 219, 502-514 (2011).
Arctocephalus_forsteri	Pierce, S. E., Clack, J. A. & Hutchinson, J. R. Comparative axial morphology in pinnipeds and its correlation with aquatic locomotory behaviour. J. Anat. 219, 502-514 (2011).
Arctocephalus_australis	Pierce, S. E., Clack, J. A. & Hutchinson, J. R. Comparative axial morphology in pinnipeds and its correlation with aquatic locomotory behaviour. J. Anat. 219, 502-514 (2011).
Mydaus_javanensis	Ercoli, M. D. Morfología del aparato músculo-esqueletario del postcráneo de los mustélidos (Carnivora, Mammalia) fósiles y vivientes de América del Sur: implicancias funcionales en un contexto filogenético (Doctoral dissertation, Universidad Nacional de La Plata, 2015).
Spilogale_gracilis	Ercoli, M. D. Morfología del aparato músculo-esqueletario del postcráneo de los mustélidos (Carnivora, Mammalia) fósiles y vivientes de América del Sur: implicancias funcionales en un contexto filogenético (Doctoral dissertation, Universidad Nacional de La Plata, 2015).
Mephitis_mephitis	Verts, B. J., Carraway, L. N. & Kinlaw, A. Spilogale gracilis. Mamm. Spec., 674, 1-10 (2001).
Conepatus_humboldtii	Verts, B. J., Carraway, L. N. & Kinlaw, A. Spilogale gracilis. Mamm. Spec., 674, 1-10 (2001).
Conepatus_chinga	Ercoli, M. D. Morfología del aparato músculo-esqueletario del postcráneo de los mustélidos (Carnivora, Mammalia) fósiles y vivientes de América del Sur: implicancias funcionales en un contexto filogenético (Doctoral dissertation, Universidad Nacional de La Plata, 2015).
Potos_flavus	Ercoli, M. D. Morfología del aparato músculo-esqueletario del postcráneo de los mustélidos (Carnivora, Mammalia) fósiles y vivientes de América del Sur: implicancias funcionales en un contexto filogenético (Doctoral dissertation, Universidad Nacional de La Plata, 2015).
Procyon_lotor	Ercoli, M. D. Morfología del aparato músculo-esqueletario del postcráneo de los mustélidos (Carnivora, Mammalia) fósiles y vivientes de América del Sur: implicancias funcionales en un contexto filogenético (Doctoral dissertation, Universidad Nacional de La Plata, 2015).
Procyon_cancrivorus	Ercoli, M. D. Morfología del aparato músculo-esqueletario del postcráneo de los mustélidos (Carnivora, Mammalia) fósiles y vivientes de América del Sur: implicancias funcionales en un contexto filogenético (Doctoral dissertation, Universidad Nacional de La Plata, 2015).
Bassariscus_astutus	Poglayen-Neuwall, I. & Toweill, D. E. (1988). Bassariscus astutus. Mamm. Spec. 327, 1-8 (1988).
Nasua_nasua	Martins, G. S., Lopes, E. R., Taques, I. I., Correia, C. Y., Meireles, Y. S., Turbino, N. C., Guimarães, L. D. and Néspoli, P. B. Aspectos da morfologia radiográfica do esqueleto, tórax e abdome do quati (Nasua nasua Linnaeus, 1766). Pesq Veter. Brasil. 33, 1137-1143 (2013).
Nasua_narica	Ercoli, M. D. Morfología del aparato músculo-esqueletario del postcráneo de los mustélidos (Carnivora, Mammalia) fósiles y vivientes de América del Sur: implicancias funcionales en un contexto filogenético (Doctoral dissertation, Universidad Nacional de La Plata, 2015).
Bassaricyon_alleni	Ercoli, M. D. Morfología del aparato músculo-esqueletario del postcráneo de los mustélidos (Carnivora, Mammalia) fósiles y vivientes de América del Sur: implicancias funcionales en un contexto filogenético (Doctoral dissertation, Universidad Nacional de La Plata, 2015).
Taxidea_taxus	Ercoli, M. D. Morfología del aparato músculo-esqueletario del postcráneo de los mustélidos (Carnivora, Mammalia) fósiles y vivientes de América del Sur: implicancias funcionales en un contexto filogenético (Doctoral dissertation, Universidad Nacional de La Plata, 2015).
Meles_meles	Ercoli, M. D. Morfología del aparato músculo-esqueletario del postcráneo de los mustélidos (Carnivora, Mammalia) fósiles y vivientes de América del Sur: implicancias funcionales en un contexto filogenético (Doctoral dissertation, Universidad Nacional de La Plata, 2015).
Meles_anakuma	Ercoli, M. D. Morfología del aparato músculo-esqueletario del postcráneo de los mustélidos (Carnivora, Mammalia) fósiles y vivientes de América del Sur: implicancias funcionales en un contexto filogenético (Doctoral dissertation, Universidad Nacional de La Plata, 2015).
Arctonyx_collaris	Ercoli, M. D. Morfología del aparato músculo-esqueletario del postcráneo de los mustélidos (Carnivora, Mammalia) fósiles y vivientes de América del Sur: implicancias funcionales en un contexto filogenético (Doctoral dissertation, Universidad Nacional de La Plata, 2015).
Mellivora_capensis	Sánchez‐Villagra, M. R., Narita, Y. & Kuratani, S. Thoracolumbar vertebral number: the first skeletal synapomorphy for afrotherian mammals. Syst. Biodiv. 5, 1–7 (2007).
Gulo_gulo	Ercoli, M. D. Morfología del aparato músculo-esqueletario del postcráneo de los mustélidos (Carnivora, Mammalia) fósiles y vivientes de América del Sur: implicancias funcionales en un contexto filogenético (Doctoral dissertation, Universidad Nacional de La Plata, 2015).
Martes_flavigula	Williams, S. A., Spear, J. K., Petrullo, L., Goldstein, D. M., Lee, A. B., Peterson, A. L., Miano, D. A., Kaczmarek, E. B. & Shattuck, M. R. Increased variation in numbers of presacral vertebrae in suspensory mammals. Nat. Ecol. Evol. 3, 949–956 (2019).
Martes_foina	Williams, S. A., Spear, J. K., Petrullo, L., Goldstein, D. M., Lee, A. B., Peterson, A. L., Miano, D. A., Kaczmarek, E. B. & Shattuck, M. R. Increased variation in numbers of presacral vertebrae in suspensory mammals. Nat. Ecol. Evol. 3, 949–956 (2019).
Martes_zibellina	Narita, Y. & Kuratani, S. Evolution of the vertebral formulae in mammals: a perspective on developmental constraints. J. Exper. Zool. B: Mol. Dev. Evol. 304, 91–106 (2005).
Martes_martes	Ercoli, M. D. Morfología del aparato músculo-esqueletario del postcráneo de los mustélidos (Carnivora, Mammalia) fósiles y vivientes de América del Sur: implicancias funcionales en un contexto filogenético (Doctoral dissertation, Universidad Nacional de La Plata, 2015).
Martes_americana	Ercoli, M. D. Morfología del aparato músculo-esqueletario del postcráneo de los mustélidos (Carnivora, Mammalia) fósiles y vivientes de América del Sur: implicancias funcionales en un contexto filogenético (Doctoral dissertation, Universidad Nacional de La Plata, 2015).
Martes_pennanti	Ercoli, M. D. Morfología del aparato músculo-esqueletario del postcráneo de los mustélidos (Carnivora, Mammalia) fósiles y vivientes de América del Sur: implicancias funcionales en un contexto filogenético (Doctoral dissertation, Universidad Nacional de La Plata, 2015).
Eira_barbara	Ercoli, M. D. Morfología del aparato músculo-esqueletario del postcráneo de los mustélidos (Carnivora, Mammalia) fósiles y vivientes de América del Sur: implicancias funcionales en un contexto filogenético (Doctoral dissertation, Universidad Nacional de La Plata, 2015).
Melogale_orientalis	Ercoli, M. D. Morfología del aparato músculo-esqueletario del postcráneo de los mustélidos (Carnivora, Mammalia) fósiles y vivientes de América del Sur: implicancias funcionales en un contexto filogenético (Doctoral dissertation, Universidad Nacional de La Plata, 2015).
Neovison_vison	Williams, S. A., Spear, J. K., Petrullo, L., Goldstein, D. M., Lee, A. B., Peterson, A. L., Miano, D. A., Kaczmarek, E. B. & Shattuck, M. R. Increased variation in numbers of presacral vertebrae in suspensory mammals. Nat. Ecol. Evol. 3, 949–956 (2019).
Mustela_frenata	Ercoli, M. D. Morfología del aparato músculo-esqueletario del postcráneo de los mustélidos (Carnivora, Mammalia) fósiles y vivientes de América del Sur: implicancias funcionales en un contexto filogenético (Doctoral dissertation, Universidad Nacional de La Plata, 2015).
Mustela_felipei	Ercoli, M. D. Morfología del aparato músculo-esqueletario del postcráneo de los mustélidos (Carnivora, Mammalia) fósiles y vivientes de América del Sur: implicancias funcionales en un contexto filogenético (Doctoral dissertation, Universidad Nacional de La Plata, 2015).
Mustela_erminea	Narita, Y. & Kuratani, S. Evolution of the vertebral formulae in mammals: a perspective on developmental constraints. J. Exper. Zool. B: Mol. Dev. Evol. 304, 91–106 (2005).
Mustela_nivalis	Ercoli, M. D. Morfología del aparato músculo-esqueletario del postcráneo de los mustélidos (Carnivora, Mammalia) fósiles y vivientes de América del Sur: implicancias funcionales en un contexto filogenético (Doctoral dissertation, Universidad Nacional de La Plata, 2015).
Mustela_sibirica	Williams, S. A., Spear, J. K., Petrullo, L., Goldstein, D. M., Lee, A. B., Peterson, A. L., Miano, D. A., Kaczmarek, E. B. & Shattuck, M. R. Increased variation in numbers of presacral vertebrae in suspensory mammals. Nat. Ecol. Evol. 3, 949–956 (2019).
Mustela_nigripes	Williams, S. A., Spear, J. K., Petrullo, L., Goldstein, D. M., Lee, A. B., Peterson, A. L., Miano, D. A., Kaczmarek, E. B. & Shattuck, M. R. Increased variation in numbers of presacral vertebrae in suspensory mammals. Nat. Ecol. Evol. 3, 949–956 (2019).
Mustela_lutreolina	Williams, S. A., Spear, J. K., Petrullo, L., Goldstein, D. M., Lee, A. B., Peterson, A. L., Miano, D. A., Kaczmarek, E. B. & Shattuck, M. R. Increased variation in numbers of presacral vertebrae in suspensory mammals. Nat. Ecol. Evol. 3, 949–956 (2019).
Mustela_putorius	Williams, S. A., Spear, J. K., Petrullo, L., Goldstein, D. M., Lee, A. B., Peterson, A. L., Miano, D. A., Kaczmarek, E. B. & Shattuck, M. R. Increased variation in numbers of presacral vertebrae in suspensory mammals. Nat. Ecol. Evol. 3, 949–956 (2019).
Ictonyx_libyca	Ercoli, M. D. Morfología del aparato músculo-esqueletario del postcráneo de los mustélidos (Carnivora, Mammalia) fósiles y vivientes de América del Sur: implicancias funcionales en un contexto filogenético (Doctoral dissertation, Universidad Nacional de La Plata, 2015).
Galictis_vittata	Ercoli, M. D. Morfología del aparato músculo-esqueletario del postcráneo de los mustélidos (Carnivora, Mammalia) fósiles y vivientes de América del Sur: implicancias funcionales en un contexto filogenético (Doctoral dissertation, Universidad Nacional de La Plata, 2015).
Lyncodon_patagonicus	Ercoli, M. D. Morfología del aparato músculo-esqueletario del postcráneo de los mustélidos (Carnivora, Mammalia) fósiles y vivientes de América del Sur: implicancias funcionales en un contexto filogenético (Doctoral dissertation, Universidad Nacional de La Plata, 2015).
Galictis_cuja	Ercoli, M. D., Echarri, S., Busker, F., Alvarez, A., Morales, M. M. & Turazzini, G. F. The functional and phylogenetic implications of the myology of the lumbar region, tail, and hind limbs of the lesser grison (Galictis cuja). J. Mamm. Evol., 20, 309-336 (2013).
Pteronura_brasiliensis	Ercoli, M. D. Morfología del aparato músculo-esqueletario del postcráneo de los mustélidos (Carnivora, Mammalia) fósiles y vivientes de América del Sur: implicancias funcionales en un contexto filogenético (Doctoral dissertation, Universidad Nacional de La Plata, 2015).
Lontra_longicaudis	Ercoli, M. D. Morfología del aparato músculo-esqueletario del postcráneo de los mustélidos (Carnivora, Mammalia) fósiles y vivientes de América del Sur: implicancias funcionales en un contexto filogenético (Doctoral dissertation, Universidad Nacional de La Plata, 2015).
Lontra_provocax	Ercoli, M. D. Morfología del aparato músculo-esqueletario del postcráneo de los mustélidos (Carnivora, Mammalia) fósiles y vivientes de América del Sur: implicancias funcionales en un contexto filogenético (Doctoral dissertation, Universidad Nacional de La Plata, 2015).
Lontra_canadensis	Ercoli, M. D. Morfología del aparato músculo-esqueletario del postcráneo de los mustélidos (Carnivora, Mammalia) fósiles y vivientes de América del Sur: implicancias funcionales en un contexto filogenético (Doctoral dissertation, Universidad Nacional de La Plata, 2015).
Enhydra_lutris	Ercoli, M. D. Morfología del aparato músculo-esqueletario del postcráneo de los mustélidos (Carnivora, Mammalia) fósiles y vivientes de América del Sur: implicancias funcionales en un contexto filogenético (Doctoral dissertation, Universidad Nacional de La Plata, 2015).
Lutra_maculicollis	Ercoli, M. D. Morfología del aparato músculo-esqueletario del postcráneo de los mustélidos (Carnivora, Mammalia) fósiles y vivientes de América del Sur: implicancias funcionales en un contexto filogenético (Doctoral dissertation, Universidad Nacional de La Plata, 2015).
Lutra_lutra	Ercoli, M. D. Morfología del aparato músculo-esqueletario del postcráneo de los mustélidos (Carnivora, Mammalia) fósiles y vivientes de América del Sur: implicancias funcionales en un contexto filogenético (Doctoral dissertation, Universidad Nacional de La Plata, 2015).
Aonyx_cinerea	Ercoli, M. D. Morfología del aparato músculo-esqueletario del postcráneo de los mustélidos (Carnivora, Mammalia) fósiles y vivientes de América del Sur: implicancias funcionales en un contexto filogenético (Doctoral dissertation, Universidad Nacional de La Plata, 2015).
Lutrogale_perspicillata	Ercoli, M. D. Morfología del aparato músculo-esqueletario del postcráneo de los mustélidos (Carnivora, Mammalia) fósiles y vivientes de América del Sur: implicancias funcionales en un contexto filogenético (Doctoral dissertation, Universidad Nacional de La Plata, 2015).
Aonyx_capensis	Ercoli, M. D. Morfología del aparato músculo-esqueletario del postcráneo de los mustélidos (Carnivora, Mammalia) fósiles y vivientes de América del Sur: implicancias funcionales en un contexto filogenético (Doctoral dissertation, Universidad Nacional de La Plata, 2015).
Ailurus_fulgens	Roberts, M. S., & Gittleman, J. L. Ailurus fulgens. Mamm. Spec. 222, 1-8 (1984).
Ursus_maritimus	Ercoli, M. D. Morfología del aparato músculo-esqueletario del postcráneo de los mustélidos (Carnivora, Mammalia) fósiles y vivientes de América del Sur: implicancias funcionales en un contexto filogenético (Doctoral dissertation, Universidad Nacional de La Plata, 2015).
Ursus_arctos	Ercoli, M. D. Morfología del aparato músculo-esqueletario del postcráneo de los mustélidos (Carnivora, Mammalia) fósiles y vivientes de América del Sur: implicancias funcionales en un contexto filogenético (Doctoral dissertation, Universidad Nacional de La Plata, 2015).
Melursus_ursinus	Ercoli, M. D. Morfología del aparato músculo-esqueletario del postcráneo de los mustélidos (Carnivora, Mammalia) fósiles y vivientes de América del Sur: implicancias funcionales en un contexto filogenético (Doctoral dissertation, Universidad Nacional de La Plata, 2015).
Ursus_thibetanus	Williams, S. A., Spear, J. K., Petrullo, L., Goldstein, D. M., Lee, A. B., Peterson, A. L., Miano, D. A., Kaczmarek, E. B. & Shattuck, M. R. Increased variation in numbers of presacral vertebrae in suspensory mammals. Nat. Ecol. Evol. 3, 949–956 (2019).
Ursus_americanus	Ercoli, M. D. Morfología del aparato músculo-esqueletario del postcráneo de los mustélidos (Carnivora, Mammalia) fósiles y vivientes de América del Sur: implicancias funcionales en un contexto filogenético (Doctoral dissertation, Universidad Nacional de La Plata, 2015).
Helarctos_malayanus	Ercoli, M. D. Morfología del aparato músculo-esqueletario del postcráneo de los mustélidos (Carnivora, Mammalia) fósiles y vivientes de América del Sur: implicancias funcionales en un contexto filogenético (Doctoral dissertation, Universidad Nacional de La Plata, 2015).
Ailuropoda_melanoleuca	Yang, A., Fang, L. The vertebral column and the thorax of the giant panda, Ailuropoda melanoleuca. Acta Theriol. Sin. 2, 1-8 (1982).
Nandinia_binotata	Williams, S. A., Spear, J. K., Petrullo, L., Goldstein, D. M., Lee, A. B., Peterson, A. L., Miano, D. A., Kaczmarek, E. B. & Shattuck, M. R. Increased variation in numbers of presacral vertebrae in suspensory mammals. Nat. Ecol. Evol. 3, 949–956 (2019).
Hyaena_hyaena	Williams, S. A., Spear, J. K., Petrullo, L., Goldstein, D. M., Lee, A. B., Peterson, A. L., Miano, D. A., Kaczmarek, E. B. & Shattuck, M. R. Increased variation in numbers of presacral vertebrae in suspensory mammals. Nat. Ecol. Evol. 3, 949–956 (2019).
Hyaena_brunnea	Williams, S. A., Spear, J. K., Petrullo, L., Goldstein, D. M., Lee, A. B., Peterson, A. L., Miano, D. A., Kaczmarek, E. B. & Shattuck, M. R. Increased variation in numbers of presacral vertebrae in suspensory mammals. Nat. Ecol. Evol. 3, 949–956 (2019).
Proteles_cristata	Williams, S. A., Spear, J. K., Petrullo, L., Goldstein, D. M., Lee, A. B., Peterson, A. L., Miano, D. A., Kaczmarek, E. B. & Shattuck, M. R. Increased variation in numbers of presacral vertebrae in suspensory mammals. Nat. Ecol. Evol. 3, 949–956 (2019).
Crocuta_crocuta	Williams, S. A., Spear, J. K., Petrullo, L., Goldstein, D. M., Lee, A. B., Peterson, A. L., Miano, D. A., Kaczmarek, E. B. & Shattuck, M. R. Increased variation in numbers of presacral vertebrae in suspensory mammals. Nat. Ecol. Evol. 3, 949–956 (2019).
Eupleres_goudotii	Williams, S. A., Spear, J. K., Petrullo, L., Goldstein, D. M., Lee, A. B., Peterson, A. L., Miano, D. A., Kaczmarek, E. B. & Shattuck, M. R. Increased variation in numbers of presacral vertebrae in suspensory mammals. Nat. Ecol. Evol. 3, 949–956 (2019).
Salanoia_concolor	Williams, S. A., Spear, J. K., Petrullo, L., Goldstein, D. M., Lee, A. B., Peterson, A. L., Miano, D. A., Kaczmarek, E. B. & Shattuck, M. R. Increased variation in numbers of presacral vertebrae in suspensory mammals. Nat. Ecol. Evol. 3, 949–956 (2019).
Galidictis_fasciata	Williams, S. A., Spear, J. K., Petrullo, L., Goldstein, D. M., Lee, A. B., Peterson, A. L., Miano, D. A., Kaczmarek, E. B. & Shattuck, M. R. Increased variation in numbers of presacral vertebrae in suspensory mammals. Nat. Ecol. Evol. 3, 949–956 (2019).
Galidia_elegans	Williams, S. A., Spear, J. K., Petrullo, L., Goldstein, D. M., Lee, A. B., Peterson, A. L., Miano, D. A., Kaczmarek, E. B. & Shattuck, M. R. Increased variation in numbers of presacral vertebrae in suspensory mammals. Nat. Ecol. Evol. 3, 949–956 (2019).
Cryptoprocta_ferox	Köhncke, M. & Leonhardt, K. Cryptoprocta ferox. Mamm. Spec. 254, 1-5 (1986).
Herpestes_vitticollis	Williams, S. A., Spear, J. K., Petrullo, L., Goldstein, D. M., Lee, A. B., Peterson, A. L., Miano, D. A., Kaczmarek, E. B. & Shattuck, M. R. Increased variation in numbers of presacral vertebrae in suspensory mammals. Nat. Ecol. Evol. 3, 949–956 (2019).
Herpestes_javanicus	Williams, S. A., Spear, J. K., Petrullo, L., Goldstein, D. M., Lee, A. B., Peterson, A. L., Miano, D. A., Kaczmarek, E. B. & Shattuck, M. R. Increased variation in numbers of presacral vertebrae in suspensory mammals. Nat. Ecol. Evol. 3, 949–956 (2019).
Herpestes_edwardsii	Williams, S. A., Spear, J. K., Petrullo, L., Goldstein, D. M., Lee, A. B., Peterson, A. L., Miano, D. A., Kaczmarek, E. B. & Shattuck, M. R. Increased variation in numbers of presacral vertebrae in suspensory mammals. Nat. Ecol. Evol. 3, 949–956 (2019).
Herpestes_ichneumon	Williams, S. A., Spear, J. K., Petrullo, L., Goldstein, D. M., Lee, A. B., Peterson, A. L., Miano, D. A., Kaczmarek, E. B. & Shattuck, M. R. Increased variation in numbers of presacral vertebrae in suspensory mammals. Nat. Ecol. Evol. 3, 949–956 (2019).
Ichneumia_albicauda	Williams, S. A., Spear, J. K., Petrullo, L., Goldstein, D. M., Lee, A. B., Peterson, A. L., Miano, D. A., Kaczmarek, E. B. & Shattuck, M. R. Increased variation in numbers of presacral vertebrae in suspensory mammals. Nat. Ecol. Evol. 3, 949–956 (2019).
Cynictis_penicillata	Williams, S. A., Spear, J. K., Petrullo, L., Goldstein, D. M., Lee, A. B., Peterson, A. L., Miano, D. A., Kaczmarek, E. B. & Shattuck, M. R. Increased variation in numbers of presacral vertebrae in suspensory mammals. Nat. Ecol. Evol. 3, 949–956 (2019).
Bdeogale_crassicauda	Williams, S. A., Spear, J. K., Petrullo, L., Goldstein, D. M., Lee, A. B., Peterson, A. L., Miano, D. A., Kaczmarek, E. B. & Shattuck, M. R. Increased variation in numbers of presacral vertebrae in suspensory mammals. Nat. Ecol. Evol. 3, 949–956 (2019).
Crossarchus_obscurus	Williams, S. A., Spear, J. K., Petrullo, L., Goldstein, D. M., Lee, A. B., Peterson, A. L., Miano, D. A., Kaczmarek, E. B. & Shattuck, M. R. Increased variation in numbers of presacral vertebrae in suspensory mammals. Nat. Ecol. Evol. 3, 949–956 (2019).
Helogale_parvula	Williams, S. A., Spear, J. K., Petrullo, L., Goldstein, D. M., Lee, A. B., Peterson, A. L., Miano, D. A., Kaczmarek, E. B. & Shattuck, M. R. Increased variation in numbers of presacral vertebrae in suspensory mammals. Nat. Ecol. Evol. 3, 949–956 (2019).
Liberiictis_kuhni	Williams, S. A., Spear, J. K., Petrullo, L., Goldstein, D. M., Lee, A. B., Peterson, A. L., Miano, D. A., Kaczmarek, E. B. & Shattuck, M. R. Increased variation in numbers of presacral vertebrae in suspensory mammals. Nat. Ecol. Evol. 3, 949–956 (2019).
Mungos_mungo	Williams, S. A., Spear, J. K., Petrullo, L., Goldstein, D. M., Lee, A. B., Peterson, A. L., Miano, D. A., Kaczmarek, E. B. & Shattuck, M. R. Increased variation in numbers of presacral vertebrae in suspensory mammals. Nat. Ecol. Evol. 3, 949–956 (2019).
Suricata_suricatta	Williams, S. A., Spear, J. K., Petrullo, L., Goldstein, D. M., Lee, A. B., Peterson, A. L., Miano, D. A., Kaczmarek, E. B. & Shattuck, M. R. Increased variation in numbers of presacral vertebrae in suspensory mammals. Nat. Ecol. Evol. 3, 949–956 (2019).
Genetta_maculata	Williams, S. A., Spear, J. K., Petrullo, L., Goldstein, D. M., Lee, A. B., Peterson, A. L., Miano, D. A., Kaczmarek, E. B. & Shattuck, M. R. Increased variation in numbers of presacral vertebrae in suspensory mammals. Nat. Ecol. Evol. 3, 949–956 (2019).
Genetta_tigrina	Williams, S. A., Spear, J. K., Petrullo, L., Goldstein, D. M., Lee, A. B., Peterson, A. L., Miano, D. A., Kaczmarek, E. B. & Shattuck, M. R. Increased variation in numbers of presacral vertebrae in suspensory mammals. Nat. Ecol. Evol. 3, 949–956 (2019).
Genetta_genetta	Williams, S. A., Spear, J. K., Petrullo, L., Goldstein, D. M., Lee, A. B., Peterson, A. L., Miano, D. A., Kaczmarek, E. B. & Shattuck, M. R. Increased variation in numbers of presacral vertebrae in suspensory mammals. Nat. Ecol. Evol. 3, 949–956 (2019).
Genetta_servalina	Williams, S. A., Spear, J. K., Petrullo, L., Goldstein, D. M., Lee, A. B., Peterson, A. L., Miano, D. A., Kaczmarek, E. B. & Shattuck, M. R. Increased variation in numbers of presacral vertebrae in suspensory mammals. Nat. Ecol. Evol. 3, 949–956 (2019).
Viverricula_indica	Williams, S. A., Spear, J. K., Petrullo, L., Goldstein, D. M., Lee, A. B., Peterson, A. L., Miano, D. A., Kaczmarek, E. B. & Shattuck, M. R. Increased variation in numbers of presacral vertebrae in suspensory mammals. Nat. Ecol. Evol. 3, 949–956 (2019).
Viverra_tangalunga	Williams, S. A., Spear, J. K., Petrullo, L., Goldstein, D. M., Lee, A. B., Peterson, A. L., Miano, D. A., Kaczmarek, E. B. & Shattuck, M. R. Increased variation in numbers of presacral vertebrae in suspensory mammals. Nat. Ecol. Evol. 3, 949–956 (2019).
Viverra_zibetha	Sánchez‐Villagra, M. R., Narita, Y. & Kuratani, S. Thoracolumbar vertebral number: the first skeletal synapomorphy for afrotherian mammals. Syst. Biodiv. 5, 1–7 (2007).
Civettictis_civetta	Narita, Y. & Kuratani, S. Evolution of the vertebral formulae in mammals: a perspective on developmental constraints. J. Exper. Zool. B: Mol. Dev. Evol. 304, 91–106 (2005).
Macrogalidia_musschenbroekii	Williams, S. A., Spear, J. K., Petrullo, L., Goldstein, D. M., Lee, A. B., Peterson, A. L., Miano, D. A., Kaczmarek, E. B. & Shattuck, M. R. Increased variation in numbers of presacral vertebrae in suspensory mammals. Nat. Ecol. Evol. 3, 949–956 (2019).
Cynogale_bennettii	Williams, S. A., Spear, J. K., Petrullo, L., Goldstein, D. M., Lee, A. B., Peterson, A. L., Miano, D. A., Kaczmarek, E. B. & Shattuck, M. R. Increased variation in numbers of presacral vertebrae in suspensory mammals. Nat. Ecol. Evol. 3, 949–956 (2019).
Hemigalus_derbyanus	Williams, S. A., Spear, J. K., Petrullo, L., Goldstein, D. M., Lee, A. B., Peterson, A. L., Miano, D. A., Kaczmarek, E. B. & Shattuck, M. R. Increased variation in numbers of presacral vertebrae in suspensory mammals. Nat. Ecol. Evol. 3, 949–956 (2019).
Paradoxurus_hermaphroditus	Williams, S. A., Spear, J. K., Petrullo, L., Goldstein, D. M., Lee, A. B., Peterson, A. L., Miano, D. A., Kaczmarek, E. B. & Shattuck, M. R. Increased variation in numbers of presacral vertebrae in suspensory mammals. Nat. Ecol. Evol. 3, 949–956 (2019).
Arctictis_binturong	Sánchez‐Villagra, M. R., Narita, Y. & Kuratani, S. Thoracolumbar vertebral number: the first skeletal synapomorphy for afrotherian mammals. Syst. Biodiv. 5, 1–7 (2007).
Prionodon_pardicolor	Williams, S. A., Spear, J. K., Petrullo, L., Goldstein, D. M., Lee, A. B., Peterson, A. L., Miano, D. A., Kaczmarek, E. B. & Shattuck, M. R. Increased variation in numbers of presacral vertebrae in suspensory mammals. Nat. Ecol. Evol. 3, 949–956 (2019).
Prionodon_linsang	Williams, S. A., Spear, J. K., Petrullo, L., Goldstein, D. M., Lee, A. B., Peterson, A. L., Miano, D. A., Kaczmarek, E. B. & Shattuck, M. R. Increased variation in numbers of presacral vertebrae in suspensory mammals. Nat. Ecol. Evol. 3, 949–956 (2019).
Neofelis_nebulosa	Williams, S. A., Spear, J. K., Petrullo, L., Goldstein, D. M., Lee, A. B., Peterson, A. L., Miano, D. A., Kaczmarek, E. B. & Shattuck, M. R. Increased variation in numbers of presacral vertebrae in suspensory mammals. Nat. Ecol. Evol. 3, 949–956 (2019).
Panthera_tigris	Williams, S. A., Spear, J. K., Petrullo, L., Goldstein, D. M., Lee, A. B., Peterson, A. L., Miano, D. A., Kaczmarek, E. B. & Shattuck, M. R. Increased variation in numbers of presacral vertebrae in suspensory mammals. Nat. Ecol. Evol. 3, 949–956 (2019).
Panthera_onca	Williams, S. A., Spear, J. K., Petrullo, L., Goldstein, D. M., Lee, A. B., Peterson, A. L., Miano, D. A., Kaczmarek, E. B. & Shattuck, M. R. Increased variation in numbers of presacral vertebrae in suspensory mammals. Nat. Ecol. Evol. 3, 949–956 (2019).
Panthera_uncia	Williams, S. A., Spear, J. K., Petrullo, L., Goldstein, D. M., Lee, A. B., Peterson, A. L., Miano, D. A., Kaczmarek, E. B. & Shattuck, M. R. Increased variation in numbers of presacral vertebrae in suspensory mammals. Nat. Ecol. Evol. 3, 949–956 (2019).
Panthera_pardus	Williams, S. A., Spear, J. K., Petrullo, L., Goldstein, D. M., Lee, A. B., Peterson, A. L., Miano, D. A., Kaczmarek, E. B. & Shattuck, M. R. Increased variation in numbers of presacral vertebrae in suspensory mammals. Nat. Ecol. Evol. 3, 949–956 (2019).
Panthera_leo	Williams, S. A., Spear, J. K., Petrullo, L., Goldstein, D. M., Lee, A. B., Peterson, A. L., Miano, D. A., Kaczmarek, E. B. & Shattuck, M. R. Increased variation in numbers of presacral vertebrae in suspensory mammals. Nat. Ecol. Evol. 3, 949–956 (2019).
Lynx_rufus	Williams, S. A., Spear, J. K., Petrullo, L., Goldstein, D. M., Lee, A. B., Peterson, A. L., Miano, D. A., Kaczmarek, E. B. & Shattuck, M. R. Increased variation in numbers of presacral vertebrae in suspensory mammals. Nat. Ecol. Evol. 3, 949–956 (2019).
Lynx_lynx	Galis, F., Carrier, D. R., van Alphen, J., van der Mije, S. D., Van Dooren, T. J., Metz, J. A. & ten Broek, C. M. Fast running restricts evolutionary change of the vertebral column in mammals. Proc. Natl. Acad. Sci. USA 111, 11401–11406 (2014).
Lynx_canadensis	Williams, S. A., Spear, J. K., Petrullo, L., Goldstein, D. M., Lee, A. B., Peterson, A. L., Miano, D. A., Kaczmarek, E. B. & Shattuck, M. R. Increased variation in numbers of presacral vertebrae in suspensory mammals. Nat. Ecol. Evol. 3, 949–956 (2019).
Acinonyx_jubatus	Williams, S. A., Spear, J. K., Petrullo, L., Goldstein, D. M., Lee, A. B., Peterson, A. L., Miano, D. A., Kaczmarek, E. B. & Shattuck, M. R. Increased variation in numbers of presacral vertebrae in suspensory mammals. Nat. Ecol. Evol. 3, 949–956 (2019).
Puma_concolor	Galis, F., Carrier, D. R., van Alphen, J., van der Mije, S. D., Van Dooren, T. J., Metz, J. A. & ten Broek, C. M. Fast running restricts evolutionary change of the vertebral column in mammals. Proc. Natl. Acad. Sci. USA 111, 11401–11406 (2014).
Felis_catus	Narita, Y. & Kuratani, S. Evolution of the vertebral formulae in mammals: a perspective on developmental constraints. J. Exper. Zool. B: Mol. Dev. Evol. 304, 91–106 (2005).
Felis_silvestris	Galis, F., Carrier, D. R., van Alphen, J., van der Mije, S. D., Van Dooren, T. J., Metz, J. A. & ten Broek, C. M. Fast running restricts evolutionary change of the vertebral column in mammals. Proc. Natl. Acad. Sci. USA 111, 11401–11406 (2014).
Leopardus_pardalis	Williams, S. A., Spear, J. K., Petrullo, L., Goldstein, D. M., Lee, A. B., Peterson, A. L., Miano, D. A., Kaczmarek, E. B. & Shattuck, M. R. Increased variation in numbers of presacral vertebrae in suspensory mammals. Nat. Ecol. Evol. 3, 949–956 (2019).
Leopardus_wiedii	Williams, S. A., Spear, J. K., Petrullo, L., Goldstein, D. M., Lee, A. B., Peterson, A. L., Miano, D. A., Kaczmarek, E. B. & Shattuck, M. R. Increased variation in numbers of presacral vertebrae in suspensory mammals. Nat. Ecol. Evol. 3, 949–956 (2019).
Leopardus_tigrinus	Williams, S. A., Spear, J. K., Petrullo, L., Goldstein, D. M., Lee, A. B., Peterson, A. L., Miano, D. A., Kaczmarek, E. B. & Shattuck, M. R. Increased variation in numbers of presacral vertebrae in suspensory mammals. Nat. Ecol. Evol. 3, 949–956 (2019).
Prionailurus_bengalensis	Galis, F., Carrier, D. R., van Alphen, J., van der Mije, S. D., Van Dooren, T. J., Metz, J. A. & ten Broek, C. M. Fast running restricts evolutionary change of the vertebral column in mammals. Proc. Natl. Acad. Sci. USA 111, 11401–11406 (2014).
Leptailurus_serval	Williams, S. A., Spear, J. K., Petrullo, L., Goldstein, D. M., Lee, A. B., Peterson, A. L., Miano, D. A., Kaczmarek, E. B. & Shattuck, M. R. Increased variation in numbers of presacral vertebrae in suspensory mammals. Nat. Ecol. Evol. 3, 949–956 (2019).
Caracal_caracal	Galis, F., Carrier, D. R., van Alphen, J., van der Mije, S. D., Van Dooren, T. J., Metz, J. A. & ten Broek, C. M. Fast running restricts evolutionary change of the vertebral column in mammals. Proc. Natl. Acad. Sci. USA 111, 11401–11406 (2014).
Equus_africanus	Williams, S. A., Spear, J. K., Petrullo, L., Goldstein, D. M., Lee, A. B., Peterson, A. L., Miano, D. A., Kaczmarek, E. B. & Shattuck, M. R. Increased variation in numbers of presacral vertebrae in suspensory mammals. Nat. Ecol. Evol. 3, 949–956 (2019).
Equus_grevyi	Williams, S. A., Spear, J. K., Petrullo, L., Goldstein, D. M., Lee, A. B., Peterson, A. L., Miano, D. A., Kaczmarek, E. B. & Shattuck, M. R. Increased variation in numbers of presacral vertebrae in suspensory mammals. Nat. Ecol. Evol. 3, 949–956 (2019).
Equus_quagga	Williams, S. A., Spear, J. K., Petrullo, L., Goldstein, D. M., Lee, A. B., Peterson, A. L., Miano, D. A., Kaczmarek, E. B. & Shattuck, M. R. Increased variation in numbers of presacral vertebrae in suspensory mammals. Nat. Ecol. Evol. 3, 949–956 (2019).
Equus_zebra	Williams, S. A., Spear, J. K., Petrullo, L., Goldstein, D. M., Lee, A. B., Peterson, A. L., Miano, D. A., Kaczmarek, E. B. & Shattuck, M. R. Increased variation in numbers of presacral vertebrae in suspensory mammals. Nat. Ecol. Evol. 3, 949–956 (2019).
Equus_hemionus	Williams, S. A., Spear, J. K., Petrullo, L., Goldstein, D. M., Lee, A. B., Peterson, A. L., Miano, D. A., Kaczmarek, E. B. & Shattuck, M. R. Increased variation in numbers of presacral vertebrae in suspensory mammals. Nat. Ecol. Evol. 3, 949–956 (2019).
Equus_caballus	Asher, R. J., Lin, K. H., Kardjilov, N. & Hautier, L. Variability and constraint in the mammalian vertebral column. J. Evol. Biol. 24, 1080-1090 (2011).
Equus_ferus	Williams, S. A., Spear, J. K., Petrullo, L., Goldstein, D. M., Lee, A. B., Peterson, A. L., Miano, D. A., Kaczmarek, E. B. & Shattuck, M. R. Increased variation in numbers of presacral vertebrae in suspensory mammals. Nat. Ecol. Evol. 3, 949–956 (2019).
Tapirus_indicus	Williams, S. A., Spear, J. K., Petrullo, L., Goldstein, D. M., Lee, A. B., Peterson, A. L., Miano, D. A., Kaczmarek, E. B. & Shattuck, M. R. Increased variation in numbers of presacral vertebrae in suspensory mammals. Nat. Ecol. Evol. 3, 949–956 (2019).
Tapirus_terrestris	Williams, S. A., Spear, J. K., Petrullo, L., Goldstein, D. M., Lee, A. B., Peterson, A. L., Miano, D. A., Kaczmarek, E. B. & Shattuck, M. R. Increased variation in numbers of presacral vertebrae in suspensory mammals. Nat. Ecol. Evol. 3, 949–956 (2019).
Tapirus_bairdii	Williams, S. A., Spear, J. K., Petrullo, L., Goldstein, D. M., Lee, A. B., Peterson, A. L., Miano, D. A., Kaczmarek, E. B. & Shattuck, M. R. Increased variation in numbers of presacral vertebrae in suspensory mammals. Nat. Ecol. Evol. 3, 949–956 (2019).
Rhinoceros_unicornis	Williams, S. A., Spear, J. K., Petrullo, L., Goldstein, D. M., Lee, A. B., Peterson, A. L., Miano, D. A., Kaczmarek, E. B. & Shattuck, M. R. Increased variation in numbers of presacral vertebrae in suspensory mammals. Nat. Ecol. Evol. 3, 949–956 (2019).
Rhinoceros_sondaicus	Groves, C. P. & Leslie Jr, D. M. Rhinoceros sondaicus (Perissodactyla: Rhinocerotidae). Mamm. Spec. 887, 190-208 (2011).
Dicerorhinus_sumatrensis	Williams, S. A., Spear, J. K., Petrullo, L., Goldstein, D. M., Lee, A. B., Peterson, A. L., Miano, D. A., Kaczmarek, E. B. & Shattuck, M. R. Increased variation in numbers of presacral vertebrae in suspensory mammals. Nat. Ecol. Evol. 3, 949–956 (2019).
Diceros_bicornis	Owen, R. Descriptive catalogue of the osteological series contained in the museum of the Royal College of Surgeons of England. Vol. 2 (Taylor and Francis, 1853).
Ceratotherium_simum	Williams, S. A., Spear, J. K., Petrullo, L., Goldstein, D. M., Lee, A. B., Peterson, A. L., Miano, D. A., Kaczmarek, E. B. & Shattuck, M. R. Increased variation in numbers of presacral vertebrae in suspensory mammals. Nat. Ecol. Evol. 3, 949–956 (2019).
Vicugna_pacos	Owen, R. Descriptive catalogue of the osteological series contained in the museum of the Royal College of Surgeons of England. Vol. 2 (Taylor and Francis, 1853).
Vicugna_vicugna	Owen, R. Descriptive catalogue of the osteological series contained in the museum of the Royal College of Surgeons of England. Vol. 2 (Taylor and Francis, 1853).
Lama_glama	Narita, Y. & Kuratani, S. Evolution of the vertebral formulae in mammals: a perspective on developmental constraints. J. Exper. Zool. B: Mol. Dev. Evol. 304, 91–106 (2005).
Camelus_dromedarius	Martini, P., Schmid, P. & Costeur, L. (2018). Comparative morphometry of bactrian camel and dromedary. J. Mamm. Evol. 25, 407-425 (2018).
Camelus_ferus	Belyaev, R. I., Kuznetsov, A. N. & Prilepskaya, N. E. How the even‐toed ungulate J. Anat. 239, 1370-1399 (2021).
Tayassu_pecari	Narita, Y. & Kuratani, S. Evolution of the vertebral formulae in mammals: a perspective on developmental constraints. J. Exper. Zool. B: Mol. Dev. Evol. 304, 91–106 (2005).
Pecari_tajacu	Williams, S. A., Spear, J. K., Petrullo, L., Goldstein, D. M., Lee, A. B., Peterson, A. L., Miano, D. A., Kaczmarek, E. B. & Shattuck, M. R. Increased variation in numbers of presacral vertebrae in suspensory mammals. Nat. Ecol. Evol. 3, 949–956 (2019).
Sus_scrofa	Asher, R. J., Lin, K. H., Kardjilov, N. & Hautier, L. Variability and constraint in the mammalian vertebral column. J. Evol. Biol. 24, 1080-1090 (2011).
Sus_barbatus	Asher, R. J., Lin, K. H., Kardjilov, N. & Hautier, L. Variability and constraint in the mammalian vertebral column. J. Evol. Biol. 24, 1080-1090 (2011).
Potamochoerus_porcus	Williams, S. A., Spear, J. K., Petrullo, L., Goldstein, D. M., Lee, A. B., Peterson, A. L., Miano, D. A., Kaczmarek, E. B. & Shattuck, M. R. Increased variation in numbers of presacral vertebrae in suspensory mammals. Nat. Ecol. Evol. 3, 949–956 (2019).
Phacochoerus_africanus	Williams, S. A., Spear, J. K., Petrullo, L., Goldstein, D. M., Lee, A. B., Peterson, A. L., Miano, D. A., Kaczmarek, E. B. & Shattuck, M. R. Increased variation in numbers of presacral vertebrae in suspensory mammals. Nat. Ecol. Evol. 3, 949–956 (2019).
Phacochoerus_aethiopicus	Narita, Y. & Kuratani, S. Evolution of the vertebral formulae in mammals: a perspective on developmental constraints. J. Exper. Zool. B: Mol. Dev. Evol. 304, 91–106 (2005).
Hylochoerus_meinertzhageni	Williams, S. A., Spear, J. K., Petrullo, L., Goldstein, D. M., Lee, A. B., Peterson, A. L., Miano, D. A., Kaczmarek, E. B. & Shattuck, M. R. Increased variation in numbers of presacral vertebrae in suspensory mammals. Nat. Ecol. Evol. 3, 949–956 (2019).
Babyrousa_babyrussa	Galis, F., Carrier, D. R., van Alphen, J., van der Mije, S. D., Van Dooren, T. J., Metz, J. A. & ten Broek, C. M. Fast running restricts evolutionary change of the vertebral column in mammals. Proc. Natl. Acad. Sci. USA 111, 11401–11406 (2014).
Hippopotamus_amphibius	Williams, S. A., Spear, J. K., Petrullo, L., Goldstein, D. M., Lee, A. B., Peterson, A. L., Miano, D. A., Kaczmarek, E. B. & Shattuck, M. R. Increased variation in numbers of presacral vertebrae in suspensory mammals. Nat. Ecol. Evol. 3, 949–956 (2019).
Choeropsis_liberiensis	Williams, S. A., Spear, J. K., Petrullo, L., Goldstein, D. M., Lee, A. B., Peterson, A. L., Miano, D. A., Kaczmarek, E. B. & Shattuck, M. R. Increased variation in numbers of presacral vertebrae in suspensory mammals. Nat. Ecol. Evol. 3, 949–956 (2019).
Indopacetus_pacificus	Kobayashi, N., Tokutake, K., Yoshida, H., Okabe, H., Miyamoto, K., Ito, H., Higashi, N., Fukada, S., Yamazaki, K., Higa, S., Kawazu, I. & Ueda, K. (2021). The First Stranding Record of Longman's Beaked Whale (Indopacetus pacificus) in Okinawa, Japan. Aquat. Mamm. 47, 153-174(2021).
Kogia_sima	Pinedo, M. C. First record of a dwarf sperm whale from southwest Atlantic, with reference to osteology, food habits and reproduction. Sci. Rep. Whales Res. Inst. 38, 171-186 (1987).
Kogia_breviceps	Buchholtz, E. A. & Gee, J. K. Finding sacral: developmental evolution of the axial skeleton of odontocetes (Cetacea). Evol. Dev. 19, 190-204 (2017).
Physeter_macrocephalus	Wursig, B. & Perrin, W. F. (Eds.). Encyclopedia of marine mammals (Academic Press, 2009).
Platanista_gangetica	Wursig, B. & Perrin, W. F. (Eds.). Encyclopedia of marine mammals (Academic Press, 2009).
Pontoporia_blainvillei	Wursig, B. & Perrin, W. F. (Eds.). Encyclopedia of marine mammals (Academic Press, 2009).
Inia_geoffrensis	Wursig, B. & Perrin, W. F. (Eds.). Encyclopedia of marine mammals (Academic Press, 2009).
Inia_araguaiaensis	Wursig, B. & Perrin, W. F. (Eds.). Encyclopedia of marine mammals (Academic Press, 2009).
Lipotes_vexillifer	Buchholtz, E. A. & Gee, J. K. Finding sacral: developmental evolution of the axial skeleton of odontocetes (Cetacea). Evol. Dev. 19, 190-204 (2017).
Delphinapterus_leucas	Wursig, B. & Perrin, W. F. (Eds.). Encyclopedia of marine mammals (Academic Press, 2009).
Mesoplodon_bowdoini	Laporta, P., Praderi, R., Little, V. & Le Bas, A. (2005). An Andrew's beaked whale Mesoplodon bowdoini (Cetacea, Ziphiidae) stranded on the Atlantic Coast of Uruguay. Latin Amer. J. Aquat. Mamm. 4, 101-111 (2005).
Monodon_monoceros	Wursig, B. & Perrin, W. F. (Eds.). Encyclopedia of marine mammals (Academic Press, 2009).
Neophocaena_phocaenoides	Wursig, B. & Perrin, W. F. (Eds.). Encyclopedia of marine mammals (Academic Press, 2009).
Phocoenoides_dalli	Wursig, B. & Perrin, W. F. (Eds.). Encyclopedia of marine mammals (Academic Press, 2009).
Phocoena_phocoena	Wursig, B. & Perrin, W. F. (Eds.). Encyclopedia of marine mammals (Academic Press, 2009).
Phocoena_spinipinnis	Wursig, B. & Perrin, W. F. (Eds.). Encyclopedia of marine mammals (Academic Press, 2009).
Phocoena_dioptrica	Natalie, R. & Goodall, P. Spectacled porpoise: Phocoena dioptrica. In Encyclopedia of Marine Mammals, pp. 1087-1091 ( Academic Press, 2009).
Lagenorhynchus_acutus	Reeves, R. R., Smeenk, C. & Brownell Jr, R. L. Lagenorhynchus acutus (Gray, 1828). Handbook of Marine Mammals 6, 31-56 (1998).
Lagenorhynchus_albirostris	Galatius, A. & Kinze, C. C. Lagenorhynchus albirostris (Cetacea: Delphinidae). Mamm. Spec., 48, 35-47 (2016).
Orcinus_orca	Wursig, B. & Perrin, W. F. (Eds.). Encyclopedia of marine mammals (Academic Press, 2009).
Orcaella_brevirostris	Wursig, B. & Perrin, W. F. (Eds.). Encyclopedia of marine mammals (Academic Press, 2009).
Grampus_griseus	Wursig, B. & Perrin, W. F. (Eds.). Encyclopedia of marine mammals (Academic Press, 2009).
Pseudorca_crassidens	Wursig, B. & Perrin, W. F. (Eds.). Encyclopedia of marine mammals (Academic Press, 2009).
Peponocephala_electra	Wursig, B. & Perrin, W. F. (Eds.). Encyclopedia of marine mammals (Academic Press, 2009).
Globicephala_melas	Wursig, B. & Perrin, W. F. (Eds.). Encyclopedia of marine mammals (Academic Press, 2009).
Globicephala_macrorhynchus	Wursig, B. & Perrin, W. F. (Eds.). Encyclopedia of marine mammals (Academic Press, 2009).
Feresa_attenuata	Wursig, B. & Perrin, W. F. (Eds.). Encyclopedia of marine mammals (Academic Press, 2009).
Steno_bredanensis	Wursig, B. & Perrin, W. F. (Eds.). Encyclopedia of marine mammals (Academic Press, 2009).
Sotalia_guianensis	Wursig, B. & Perrin, W. F. (Eds.). Encyclopedia of marine mammals (Academic Press, 2009).
Sotalia_fluviatilis	Wursig, B. & Perrin, W. F. (Eds.). Encyclopedia of marine mammals (Academic Press, 2009).
Tursiops_truncatus	Wursig, B. & Perrin, W. F. (Eds.). Encyclopedia of marine mammals (Academic Press, 2009).
Stenella_attenuata	Wursig, B. & Perrin, W. F. (Eds.). Encyclopedia of marine mammals (Academic Press, 2009).
Lagenodelphis_hosei	Wursig, B. & Perrin, W. F. (Eds.). Encyclopedia of marine mammals (Academic Press, 2009).
Stenella_longirostris	Wursig, B. & Perrin, W. F. (Eds.). Encyclopedia of marine mammals (Academic Press, 2009).
Sousa_chinensis	Buchholtz, E. A. & Gee, J. K. Finding sacral: developmental evolution of the axial skeleton of odontocetes (Cetacea). Evol. Dev. 19, 190-204 (2017).
Tursiops_aduncus	Buchholtz, E. A. & Gee, J. K. Finding sacral: developmental evolution of the axial skeleton of odontocetes (Cetacea). Evol. Dev. 19, 190-204 (2017).
Stenella_frontalis	Perrin, W. F. Stenella frontalis. Mamm. Spec. 702, 1-6 (2002).
Stenella_coeruleoalba	Wursig, B. & Perrin, W. F. (Eds.). Encyclopedia of marine mammals (Academic Press, 2009).
Stenella_clymene	Wursig, B. & Perrin, W. F. (Eds.). Encyclopedia of marine mammals (Academic Press, 2009).
Delphinus_delphis	Wursig, B. & Perrin, W. F. (Eds.). Encyclopedia of marine mammals (Academic Press, 2009).
Delphinus_capensis	Wursig, B. & Perrin, W. F. (Eds.). Encyclopedia of marine mammals (Academic Press, 2009).
Lagenorhynchus_obscurus	Van Waerebeek, K., Van Bree, P. J. H. & Best, P. B. On the identity of Prodelphinus petersii Lütken, 1889 and records of dusky dolphin Lagenorhynchus obscurus (Gray, 1828) from the Southern Indian and Atlantic oceans. South Afr. J. Mar. Sci. 16, 25-35 (1995).
Lagenorhynchus_obliquidens	Brownell Jr, R. L., Walker, W. A. & Forney, K. A. Pacific white-sided dolphin Lagenorhynchus obliquidens (Gill, 1865). Handbook of marine mammals 6, 57-84 (1998).
Lagenorhynchus_cruciger	Brownell Jr, R. L. & Donahue, M. A. Hourglass dolphin, Lagenorhynchus cruciger (Quoy y Gaimard, 1824). Handbook of marine mammals 6, 121-135 (1998).
Lagenorhynchus_australis	Goodall, R. N. P., Norris, K. S., Schevill, W. E., Fraga, F., Praderi, R., Iniguez, M. A. & de Haro, J. C. Review and update on the biology of Peale’s dolphin, Lagenorhynchus australis. Rep. Intern. Whaling Comm. 47, 777-796 (1997).
Cephalorhynchus_hectori	Baker, A. N., Smith, A. N. & Pichler, F. B. Geographical variation in Hector's dolphin: Recognition of new subspecies of Cephalorhynchus hectori. J. Roy. Soc. New. Zeal. 32, 713-727 (2002).
Cephalorhynchus_heavisidii	Wursig, B. & Perrin, W. F. (Eds.). Encyclopedia of marine mammals (Academic Press, 2009).
Cephalorhynchus_eutropia	Wursig, B. & Perrin, W. F. (Eds.). Encyclopedia of marine mammals (Academic Press, 2009).
Cephalorhynchus_commersonii	Wursig, B. & Perrin, W. F. (Eds.). Encyclopedia of marine mammals (Academic Press, 2009).
Berardius_bairdii	Wursig, B. & Perrin, W. F. (Eds.). Encyclopedia of marine mammals (Academic Press, 2009).
Berardius_arnuxii	Wursig, B. & Perrin, W. F. (Eds.). Encyclopedia of marine mammals (Academic Press, 2009).
Mesoplodon_bidens	Waller, G. N. H. A review of nineteenth-century records of Sowerby's beaked whale (Mesoplodon bidens). Arch. Nat. Hist. 41, 338-356 (2014).
Ziphius_cavirostris	Omura, H. An osteological study of the Cuvier’s beaked whale, Ziphius cavirostris, in the northwest Pacific. Sci. Rep. Whales Res. Inst. 24, 1-34 (1972).
Mesoplodon_stejnegeri	Miyazaki, N., Nakamura, I., Tanabe, S., & Tatsukawa, R. A stranding of mesoplodon stejegeri in the Maizuru Bay, Sea of Japan. Sci. Rep. Whales Res. Inst. Tokyo 38, 91-105 (1987).
Hyperoodon_planifrons	Clarke, R. A southern bottlenose whale examined in the Antarctic. Latin Amer. J. Aquat. Mamm. 4, 83-96 (2005).
Hyperoodon_ampullatus	Wursig, B. & Perrin, W. F. (Eds.). Encyclopedia of marine mammals (Academic Press, 2009).
Mesoplodon_hectori	Zerbini, A. N., & Secchi, E. R. Occurrence of Hector's beaked whale, Mesoplodon hectori, in southern Brazil. Aquat. Mamm. 27, 149-153 (2001).
Mesoplodon_carlhubbsi	Wursig, B. & Perrin, W. F. (Eds.). Encyclopedia of marine mammals (Academic Press, 2009).
Mesoplodon_layardii	Wursig, B. & Perrin, W. F. (Eds.). Encyclopedia of marine mammals (Academic Press, 2009).
Mesoplodon_mirus	Wursig, B. & Perrin, W. F. (Eds.). Encyclopedia of marine mammals (Academic Press, 2009).
Mesoplodon_europaeus	Norman, S. A., & Mead, J. G. (2001). Mesoplodon europaeus. Mamm. Spec. 688, 1-5 (2001).
Mesoplodon_densirostris	Allen, B. M., Mead, J. G. & Brownell, R. L. (2011). Species review of Blainville’s beaked whale, Mesoplodon densirostris. IWC Scientific Committee documents.
Mesoplodon_grayi	Wursig, B. & Perrin, W. F. (Eds.). Encyclopedia of marine mammals (Academic Press, 2009).
Tasmacetus_shepherdi	Wursig, B. & Perrin, W. F. (Eds.). Encyclopedia of marine mammals (Academic Press, 2009).
Eubalaena_glacialis	Wursig, B. & Perrin, W. F. (Eds.). Encyclopedia of marine mammals (Academic Press, 2009).
Eubalaena_japonica	Wursig, B. & Perrin, W. F. (Eds.). Encyclopedia of marine mammals (Academic Press, 2009).
Balaenoptera_physalus	Wursig, B. & Perrin, W. F. (Eds.). Encyclopedia of marine mammals (Academic Press, 2009).
Balaenoptera_musculus	Wursig, B. & Perrin, W. F. (Eds.). Encyclopedia of marine mammals (Academic Press, 2009).
Balaenoptera_omurai	Wursig, B. & Perrin, W. F. (Eds.). Encyclopedia of marine mammals (Academic Press, 2009).
Balaenoptera_borealis	Wursig, B. & Perrin, W. F. (Eds.). Encyclopedia of marine mammals (Academic Press, 2009).
Balaenoptera_edeni	Wursig, B. & Perrin, W. F. (Eds.). Encyclopedia of marine mammals (Academic Press, 2009).
Mesoplodon_perrini	Wursig, B. & Perrin, W. F. (Eds.). Encyclopedia of marine mammals (Academic Press, 2009).
Balaenoptera_bonaerensis	Wursig, B. & Perrin, W. F. (Eds.). Encyclopedia of marine mammals (Academic Press, 2009).
Mesoplodon_peruvianus	Reyes, J. C. The Lesser beaked whale Mesoplodon peruvianus Reyes, Mead & Van Waerebeek 1991 revisited, with biological observations on new specimens from Peru. J. Ma.r Biol. Oceanogr. 7, 1-10 (2018).
Lissodelphis_peronii	Wursig, B. & Perrin, W. F. (Eds.). Encyclopedia of marine mammals (Academic Press, 2009).
Lissodelphis_borealis	Wursig, B. & Perrin, W. F. (Eds.). Encyclopedia of marine mammals (Academic Press, 2009).
Balaena_mysticetus	Wursig, B. & Perrin, W. F. (Eds.). Encyclopedia of marine mammals (Academic Press, 2009).
Caperea_marginata	Wursig, B. & Perrin, W. F. (Eds.). Encyclopedia of marine mammals (Academic Press, 2009).
Balaenoptera_acutorostrata	Wursig, B. & Perrin, W. F. (Eds.). Encyclopedia of marine mammals (Academic Press, 2009).
Mesoplodon_ginkgodens	Galatius, A. & Kinze, C. C. Lagenorhynchus albirostris (Cetacea: Delphinidae). Mamm. Spec., 48, 35-47 (2016).
Megaptera_novaeangliae	Wursig, B. & Perrin, W. F. (Eds.). Encyclopedia of marine mammals (Academic Press, 2009).
Eschrichtius_robustus	Wursig, B. & Perrin, W. F. (Eds.). Encyclopedia of marine mammals (Academic Press, 2009).
Moschiola_meminna	Narita, Y. & Kuratani, S. Evolution of the vertebral formulae in mammals: a perspective on developmental constraints. J. Exper. Zool. B: Mol. Dev. Evol. 304, 91–106 (2005).
Moschiola_indica	Owen, R. Descriptive catalogue of the osteological series contained in the museum of the Royal College of Surgeons of England. Vol. 2 (Taylor and Francis, 1853).
Tragulus_javanicus	Narita, Y. & Kuratani, S. Evolution of the vertebral formulae in mammals: a perspective on developmental constraints. J. Exper. Zool. B: Mol. Dev. Evol. 304, 91–106 (2005).
Tragulus_kanchil	Owen, R. Descriptive catalogue of the osteological series contained in the museum of the Royal College of Surgeons of England. Vol. 2 (Taylor and Francis, 1853).
Tragulus_napu	Narita, Y. & Kuratani, S. Evolution of the vertebral formulae in mammals: a perspective on developmental constraints. J. Exper. Zool. B: Mol. Dev. Evol. 304, 91–106 (2005).
Okapia_johnstoni	Williams, S. A., Spear, J. K., Petrullo, L., Goldstein, D. M., Lee, A. B., Peterson, A. L., Miano, D. A., Kaczmarek, E. B. & Shattuck, M. R. Increased variation in numbers of presacral vertebrae in suspensory mammals. Nat. Ecol. Evol. 3, 949–956 (2019).
Giraffa_camelopardalis	Williams, S. A., Spear, J. K., Petrullo, L., Goldstein, D. M., Lee, A. B., Peterson, A. L., Miano, D. A., Kaczmarek, E. B. & Shattuck, M. R. Increased variation in numbers of presacral vertebrae in suspensory mammals. Nat. Ecol. Evol. 3, 949–956 (2019).
Antilocapra_americana	Williams, S. A., Spear, J. K., Petrullo, L., Goldstein, D. M., Lee, A. B., Peterson, A. L., Miano, D. A., Kaczmarek, E. B. & Shattuck, M. R. Increased variation in numbers of presacral vertebrae in suspensory mammals. Nat. Ecol. Evol. 3, 949–956 (2019).
Muntiacus_muntjak	Owen, R. Descriptive catalogue of the osteological series contained in the museum of the Royal College of Surgeons of England. Vol. 2 (Taylor and Francis, 1853).
Dama_dama	Narita, Y. & Kuratani, S. Evolution of the vertebral formulae in mammals: a perspective on developmental constraints. J. Exper. Zool. B: Mol. Dev. Evol. 304, 91–106 (2005).
Elaphurus_davidianus	Owen, R. Descriptive catalogue of the osteological series contained in the museum of the Royal College of Surgeons of England. Vol. 2 (Taylor and Francis, 1853).
Rusa_unicolor	Owen, R. Descriptive catalogue of the osteological series contained in the museum of the Royal College of Surgeons of England. Vol. 2 (Taylor and Francis, 1853).
Cervus_elaphus	Belyaev, R. I., Kuznetsov, A. N. & Prilepskaya, N. E. How the even‐toed ungulate J. Anat. 239, 1370-1399 (2021).
Axis_calamianensis	Maala, C. P., Arca, R. R., Bravo, M. V. A., Villamor, C. & Marte, R. G. Vertebral column of the calamian deer Cervus (Axis) calamianensis. Philippine J. Vet. Anim. Sci. 18, 229-238 (1992).
Axis_axis	Owen, R. Descriptive catalogue of the osteological series contained in the museum of the Royal College of Surgeons of England. Vol. 2 (Taylor and Francis, 1853).
Rangifer_tarandus	Narita, Y. & Kuratani, S. Evolution of the vertebral formulae in mammals: a perspective on developmental constraints. J. Exper. Zool. B: Mol. Dev. Evol. 304, 91–106 (2005).
Odocoileus_virginianus	Williams, S. A., Spear, J. K., Petrullo, L., Goldstein, D. M., Lee, A. B., Peterson, A. L., Miano, D. A., Kaczmarek, E. B. & Shattuck, M. R. Increased variation in numbers of presacral vertebrae in suspensory mammals. Nat. Ecol. Evol. 3, 949–956 (2019).
Odocoileus_hemionus	Williams, S. A., Spear, J. K., Petrullo, L., Goldstein, D. M., Lee, A. B., Peterson, A. L., Miano, D. A., Kaczmarek, E. B. & Shattuck, M. R. Increased variation in numbers of presacral vertebrae in suspensory mammals. Nat. Ecol. Evol. 3, 949–956 (2019).
Mazama_gouazoubira	Lima, F. C., Santos, A. L. Q., Lima, B. C., Vieira, L. G. & Hirano, L. Q. L. Topographic anatomy of the spinal cord and vertebromedullary relationships in Mazama gouazoubira Fisher, 1814 (Artiodactyla; Cervidae). Acta Scient. Biol. Sci. 32, 189-194 (2010).
Blastocerus_dichotomus	Owen, R. Descriptive catalogue of the osteological series contained in the museum of the Royal College of Surgeons of England. Vol. 2 (Taylor and Francis, 1853).
Pudu_puda	Owen, R. Descriptive catalogue of the osteological series contained in the museum of the Royal College of Surgeons of England. Vol. 2 (Taylor and Francis, 1853).
Hydropotes_inermis	Owen, R. Descriptive catalogue of the osteological series contained in the museum of the Royal College of Surgeons of England. Vol. 2 (Taylor and Francis, 1853).
Capreolus_capreolus	Belyaev, R. I., Kuznetsov, A. N. & Prilepskaya, N. E. How the even‐toed ungulate J. Anat. 239, 1370-1399 (2021).
Alces_alces	Williams, S. A., Spear, J. K., Petrullo, L., Goldstein, D. M., Lee, A. B., Peterson, A. L., Miano, D. A., Kaczmarek, E. B. & Shattuck, M. R. Increased variation in numbers of presacral vertebrae in suspensory mammals. Nat. Ecol. Evol. 3, 949–956 (2019).
Moschus_moschiferus	Narita, Y. & Kuratani, S. Evolution of the vertebral formulae in mammals: a perspective on developmental constraints. J. Exper. Zool. B: Mol. Dev. Evol. 304, 91–106 (2005).
Moschus_berezovskii	Chaofu, Y. Truncal bones dissection of Moschus berezovskii. Gansu Nong ye da xue xue bao= Gansu Nongye Daxue Xuebao, 40, 428-431 (2005).
Boselaphus_tragocamelus	Williams, S. A., Spear, J. K., Petrullo, L., Goldstein, D. M., Lee, A. B., Peterson, A. L., Miano, D. A., Kaczmarek, E. B. & Shattuck, M. R. Increased variation in numbers of presacral vertebrae in suspensory mammals. Nat. Ecol. Evol. 3, 949–956 (2019).
Tetracerus_quadricornis	Narita, Y. & Kuratani, S. Evolution of the vertebral formulae in mammals: a perspective on developmental constraints. J. Exper. Zool. B: Mol. Dev. Evol. 304, 91–106 (2005).
Tragelaphus_imberbis	Williams, S. A., Spear, J. K., Petrullo, L., Goldstein, D. M., Lee, A. B., Peterson, A. L., Miano, D. A., Kaczmarek, E. B. & Shattuck, M. R. Increased variation in numbers of presacral vertebrae in suspensory mammals. Nat. Ecol. Evol. 3, 949–956 (2019).
Tragelaphus_angasii	Williams, S. A., Spear, J. K., Petrullo, L., Goldstein, D. M., Lee, A. B., Peterson, A. L., Miano, D. A., Kaczmarek, E. B. & Shattuck, M. R. Increased variation in numbers of presacral vertebrae in suspensory mammals. Nat. Ecol. Evol. 3, 949–956 (2019).
Tragelaphus_scriptus	Williams, S. A., Spear, J. K., Petrullo, L., Goldstein, D. M., Lee, A. B., Peterson, A. L., Miano, D. A., Kaczmarek, E. B. & Shattuck, M. R. Increased variation in numbers of presacral vertebrae in suspensory mammals. Nat. Ecol. Evol. 3, 949–956 (2019).
Tragelaphus_eurycerus	Williams, S. A., Spear, J. K., Petrullo, L., Goldstein, D. M., Lee, A. B., Peterson, A. L., Miano, D. A., Kaczmarek, E. B. & Shattuck, M. R. Increased variation in numbers of presacral vertebrae in suspensory mammals. Nat. Ecol. Evol. 3, 949–956 (2019).
Tragelaphus_spekii	Williams, S. A., Spear, J. K., Petrullo, L., Goldstein, D. M., Lee, A. B., Peterson, A. L., Miano, D. A., Kaczmarek, E. B. & Shattuck, M. R. Increased variation in numbers of presacral vertebrae in suspensory mammals. Nat. Ecol. Evol. 3, 949–956 (2019).
Tragelaphus_buxtoni	Williams, S. A., Spear, J. K., Petrullo, L., Goldstein, D. M., Lee, A. B., Peterson, A. L., Miano, D. A., Kaczmarek, E. B. & Shattuck, M. R. Increased variation in numbers of presacral vertebrae in suspensory mammals. Nat. Ecol. Evol. 3, 949–956 (2019).
Tragelaphus_strepsiceros	Williams, S. A., Spear, J. K., Petrullo, L., Goldstein, D. M., Lee, A. B., Peterson, A. L., Miano, D. A., Kaczmarek, E. B. & Shattuck, M. R. Increased variation in numbers of presacral vertebrae in suspensory mammals. Nat. Ecol. Evol. 3, 949–956 (2019).
Syncerus_caffer	Williams, S. A., Spear, J. K., Petrullo, L., Goldstein, D. M., Lee, A. B., Peterson, A. L., Miano, D. A., Kaczmarek, E. B. & Shattuck, M. R. Increased variation in numbers of presacral vertebrae in suspensory mammals. Nat. Ecol. Evol. 3, 949–956 (2019).
Bubalus_mindorensis	Owen, R. Descriptive catalogue of the osteological series contained in the museum of the Royal College of Surgeons of England. Vol. 2 (Taylor and Francis, 1853).
Bubalus_depressicornis	Owen, R. Descriptive catalogue of the osteological series contained in the museum of the Royal College of Surgeons of England. Vol. 2 (Taylor and Francis, 1853).
Bubalus_arnee	Owen, R. Descriptive catalogue of the osteological series contained in the museum of the Royal College of Surgeons of England. Vol. 2 (Taylor and Francis, 1853).
Bos_gaurus	Belyaev, R. I., Kuznetsov, A. N. & Prilepskaya, N. E. How the even‐toed ungulate J. Anat. 239, 1370-1399 (2021).
Bos_taurus	Narita, Y. & Kuratani, S. Evolution of the vertebral formulae in mammals: a perspective on developmental constraints. J. Exper. Zool. B: Mol. Dev. Evol. 304, 91–106 (2005).
Bos_indicus	Owen, R. Descriptive catalogue of the osteological series contained in the museum of the Royal College of Surgeons of England. Vol. 2 (Taylor and Francis, 1853).
Bison_bonasus	Narita, Y. & Kuratani, S. Evolution of the vertebral formulae in mammals: a perspective on developmental constraints. J. Exper. Zool. B: Mol. Dev. Evol. 304, 91–106 (2005).
Bos_mutus	Owen, R. Descriptive catalogue of the osteological series contained in the museum of the Royal College of Surgeons of England. Vol. 2 (Taylor and Francis, 1853).
Bos_grunniens	Wang, Y., Cai, H., Luo, X., Ai, Y., Jiang, M. & Wen, Y. Insight into unique somitogenesis of yak (Bos grunniens) with one additional thoracic vertebra. BMC genomics 21, 1-15 (2020).
Bison_bison	Belyaev, R. I., Kuznetsov, A. N. & Prilepskaya, N. E. How the even‐toed ungulate J. Anat. 239, 1370-1399 (2021).
Nesotragus_moschatus	Owen, R. Descriptive catalogue of the osteological series contained in the museum of the Royal College of Surgeons of England. Vol. 2 (Taylor and Francis, 1853).
Aepyceros_melampus	Williams, S. A., Spear, J. K., Petrullo, L., Goldstein, D. M., Lee, A. B., Peterson, A. L., Miano, D. A., Kaczmarek, E. B. & Shattuck, M. R. Increased variation in numbers of presacral vertebrae in suspensory mammals. Nat. Ecol. Evol. 3, 949–956 (2019).
Pelea_capreolus	Owen, R. Descriptive catalogue of the osteological series contained in the museum of the Royal College of Surgeons of England. Vol. 2 (Taylor and Francis, 1853).
Redunca_fulvorufula	Williams, S. A., Spear, J. K., Petrullo, L., Goldstein, D. M., Lee, A. B., Peterson, A. L., Miano, D. A., Kaczmarek, E. B. & Shattuck, M. R. Increased variation in numbers of presacral vertebrae in suspensory mammals. Nat. Ecol. Evol. 3, 949–956 (2019).
Redunca_redunca	Williams, S. A., Spear, J. K., Petrullo, L., Goldstein, D. M., Lee, A. B., Peterson, A. L., Miano, D. A., Kaczmarek, E. B. & Shattuck, M. R. Increased variation in numbers of presacral vertebrae in suspensory mammals. Nat. Ecol. Evol. 3, 949–956 (2019).
Redunca_arundinum	Williams, S. A., Spear, J. K., Petrullo, L., Goldstein, D. M., Lee, A. B., Peterson, A. L., Miano, D. A., Kaczmarek, E. B. & Shattuck, M. R. Increased variation in numbers of presacral vertebrae in suspensory mammals. Nat. Ecol. Evol. 3, 949–956 (2019).
Kobus_megaceros	Williams, S. A., Spear, J. K., Petrullo, L., Goldstein, D. M., Lee, A. B., Peterson, A. L., Miano, D. A., Kaczmarek, E. B. & Shattuck, M. R. Increased variation in numbers of presacral vertebrae in suspensory mammals. Nat. Ecol. Evol. 3, 949–956 (2019).
Kobus_leche	Williams, S. A., Spear, J. K., Petrullo, L., Goldstein, D. M., Lee, A. B., Peterson, A. L., Miano, D. A., Kaczmarek, E. B. & Shattuck, M. R. Increased variation in numbers of presacral vertebrae in suspensory mammals. Nat. Ecol. Evol. 3, 949–956 (2019).
Kobus_vardonii	Williams, S. A., Spear, J. K., Petrullo, L., Goldstein, D. M., Lee, A. B., Peterson, A. L., Miano, D. A., Kaczmarek, E. B. & Shattuck, M. R. Increased variation in numbers of presacral vertebrae in suspensory mammals. Nat. Ecol. Evol. 3, 949–956 (2019).
Kobus_kob	Williams, S. A., Spear, J. K., Petrullo, L., Goldstein, D. M., Lee, A. B., Peterson, A. L., Miano, D. A., Kaczmarek, E. B. & Shattuck, M. R. Increased variation in numbers of presacral vertebrae in suspensory mammals. Nat. Ecol. Evol. 3, 949–956 (2019).
Kobus_ellipsiprymnus	Williams, S. A., Spear, J. K., Petrullo, L., Goldstein, D. M., Lee, A. B., Peterson, A. L., Miano, D. A., Kaczmarek, E. B. & Shattuck, M. R. Increased variation in numbers of presacral vertebrae in suspensory mammals. Nat. Ecol. Evol. 3, 949–956 (2019).
Ourebia_ourebi	Williams, S. A., Spear, J. K., Petrullo, L., Goldstein, D. M., Lee, A. B., Peterson, A. L., Miano, D. A., Kaczmarek, E. B. & Shattuck, M. R. Increased variation in numbers of presacral vertebrae in suspensory mammals. Nat. Ecol. Evol. 3, 949–956 (2019).
Raphicerus_melanotis	Owen, R. Descriptive catalogue of the osteological series contained in the museum of the Royal College of Surgeons of England. Vol. 2 (Taylor and Francis, 1853).
Raphicerus_sharpei	Owen, R. Descriptive catalogue of the osteological series contained in the museum of the Royal College of Surgeons of England. Vol. 2 (Taylor and Francis, 1853).
Raphicerus_campestris	Owen, R. Descriptive catalogue of the osteological series contained in the museum of the Royal College of Surgeons of England. Vol. 2 (Taylor and Francis, 1853).
Madoqua_kirkii	Owen, R. Descriptive catalogue of the osteological series contained in the museum of the Royal College of Surgeons of England. Vol. 2 (Taylor and Francis, 1853).
Madoqua_guentheri	Owen, R. Descriptive catalogue of the osteological series contained in the museum of the Royal College of Surgeons of England. Vol. 2 (Taylor and Francis, 1853).
Saiga_tatarica	Galis, F., Carrier, D. R., van Alphen, J., van der Mije, S. D., Van Dooren, T. J., Metz, J. A. & ten Broek, C. M. Fast running restricts evolutionary change of the vertebral column in mammals. Proc. Natl. Acad. Sci. USA 111, 11401–11406 (2014).
Nanger_granti	Galis, F., Carrier, D. R., van Alphen, J., van der Mije, S. D., Van Dooren, T. J., Metz, J. A. & ten Broek, C. M. Fast running restricts evolutionary change of the vertebral column in mammals. Proc. Natl. Acad. Sci. USA 111, 11401–11406 (2014).
Eudorcas_rufifrons	Galis, F., Carrier, D. R., van Alphen, J., van der Mije, S. D., Van Dooren, T. J., Metz, J. A. & ten Broek, C. M. Fast running restricts evolutionary change of the vertebral column in mammals. Proc. Natl. Acad. Sci. USA 111, 11401–11406 (2014).
Gazella_dorcas	Narita, Y. & Kuratani, S. Evolution of the vertebral formulae in mammals: a perspective on developmental constraints. J. Exper. Zool. B: Mol. Dev. Evol. 304, 91–106 (2005).
Gazella_gazella	Galis, F., Carrier, D. R., van Alphen, J., van der Mije, S. D., Van Dooren, T. J., Metz, J. A. & ten Broek, C. M. Fast running restricts evolutionary change of the vertebral column in mammals. Proc. Natl. Acad. Sci. USA 111, 11401–11406 (2014).
Gazella_spekei	Galis, F., Carrier, D. R., van Alphen, J., van der Mije, S. D., Van Dooren, T. J., Metz, J. A. & ten Broek, C. M. Fast running restricts evolutionary change of the vertebral column in mammals. Proc. Natl. Acad. Sci. USA 111, 11401–11406 (2014).
Antilope_cervicapra	Williams, S. A., Spear, J. K., Petrullo, L., Goldstein, D. M., Lee, A. B., Peterson, A. L., Miano, D. A., Kaczmarek, E. B. & Shattuck, M. R. Increased variation in numbers of presacral vertebrae in suspensory mammals. Nat. Ecol. Evol. 3, 949–956 (2019).
Litocranius_walleri	Galis, F., Carrier, D. R., van Alphen, J., van der Mije, S. D., Van Dooren, T. J., Metz, J. A. & ten Broek, C. M. Fast running restricts evolutionary change of the vertebral column in mammals. Proc. Natl. Acad. Sci. USA 111, 11401–11406 (2014).
Antidorcas_marsupialis	Galis, F., Carrier, D. R., van Alphen, J., van der Mije, S. D., Van Dooren, T. J., Metz, J. A. & ten Broek, C. M. Fast running restricts evolutionary change of the vertebral column in mammals. Proc. Natl. Acad. Sci. USA 111, 11401–11406 (2014).
Neotragus_pygmaeus	Owen, R. Descriptive catalogue of the osteological series contained in the museum of the Royal College of Surgeons of England. Vol. 2 (Taylor and Francis, 1853).
Oreotragus_oreotragus	Owen, R. Descriptive catalogue of the osteological series contained in the museum of the Royal College of Surgeons of England. Vol. 2 (Taylor and Francis, 1853).
Philantomba_monticola	Owen, R. Descriptive catalogue of the osteological series contained in the museum of the Royal College of Surgeons of England. Vol. 2 (Taylor and Francis, 1853).
Sylvicapra_grimmia	Owen, R. Descriptive catalogue of the osteological series contained in the museum of the Royal College of Surgeons of England. Vol. 2 (Taylor and Francis, 1853).
Cephalophus_silvicultor	Williams, S. A., Spear, J. K., Petrullo, L., Goldstein, D. M., Lee, A. B., Peterson, A. L., Miano, D. A., Kaczmarek, E. B. & Shattuck, M. R. Increased variation in numbers of presacral vertebrae in suspensory mammals. Nat. Ecol. Evol. 3, 949–956 (2019).
Cephalophus_dorsalis	Williams, S. A., Spear, J. K., Petrullo, L., Goldstein, D. M., Lee, A. B., Peterson, A. L., Miano, D. A., Kaczmarek, E. B. & Shattuck, M. R. Increased variation in numbers of presacral vertebrae in suspensory mammals. Nat. Ecol. Evol. 3, 949–956 (2019).
Cephalophus_leucogaster	Williams, S. A., Spear, J. K., Petrullo, L., Goldstein, D. M., Lee, A. B., Peterson, A. L., Miano, D. A., Kaczmarek, E. B. & Shattuck, M. R. Increased variation in numbers of presacral vertebrae in suspensory mammals. Nat. Ecol. Evol. 3, 949–956 (2019).
Cephalophus_nigrifrons	Williams, S. A., Spear, J. K., Petrullo, L., Goldstein, D. M., Lee, A. B., Peterson, A. L., Miano, D. A., Kaczmarek, E. B. & Shattuck, M. R. Increased variation in numbers of presacral vertebrae in suspensory mammals. Nat. Ecol. Evol. 3, 949–956 (2019).
Cephalophus_natalensis	Williams, S. A., Spear, J. K., Petrullo, L., Goldstein, D. M., Lee, A. B., Peterson, A. L., Miano, D. A., Kaczmarek, E. B. & Shattuck, M. R. Increased variation in numbers of presacral vertebrae in suspensory mammals. Nat. Ecol. Evol. 3, 949–956 (2019).
Cephalophus_weynsi	Williams, S. A., Spear, J. K., Petrullo, L., Goldstein, D. M., Lee, A. B., Peterson, A. L., Miano, D. A., Kaczmarek, E. B. & Shattuck, M. R. Increased variation in numbers of presacral vertebrae in suspensory mammals. Nat. Ecol. Evol. 3, 949–956 (2019).
Ovibos_moschatus	Williams, S. A., Spear, J. K., Petrullo, L., Goldstein, D. M., Lee, A. B., Peterson, A. L., Miano, D. A., Kaczmarek, E. B. & Shattuck, M. R. Increased variation in numbers of presacral vertebrae in suspensory mammals. Nat. Ecol. Evol. 3, 949–956 (2019).
Capricornis_crispus	Owen, R. Descriptive catalogue of the osteological series contained in the museum of the Royal College of Surgeons of England. Vol. 2 (Taylor and Francis, 1853).
Ovis_canadensis	Shackleton, D. M. Ovis canadensis. Mamm. Spec. 230, 1-9 (1985).
Ovis_orientalis	Owen, R. Descriptive catalogue of the osteological series contained in the museum of the Royal College of Surgeons of England. Vol. 2 (Taylor and Francis, 1853).
Ovis_aries	Narita, Y. & Kuratani, S. Evolution of the vertebral formulae in mammals: a perspective on developmental constraints. J. Exper. Zool. B: Mol. Dev. Evol. 304, 91–106 (2005).
Ovis_ammon	Narita, Y. & Kuratani, S. Evolution of the vertebral formulae in mammals: a perspective on developmental constraints. J. Exper. Zool. B: Mol. Dev. Evol. 304, 91–106 (2005).
Capra_ibex	Owen, R. Descriptive catalogue of the osteological series contained in the museum of the Royal College of Surgeons of England. Vol. 2 (Taylor and Francis, 1853).
Capra_hircus	Narita, Y. & Kuratani, S. Evolution of the vertebral formulae in mammals: a perspective on developmental constraints. J. Exper. Zool. B: Mol. Dev. Evol. 304, 91–106 (2005).
Pseudois_nayaur	Owen, R. Descriptive catalogue of the osteological series contained in the museum of the Royal College of Surgeons of England. Vol. 2 (Taylor and Francis, 1853).
Myotragus_balearicus	Owen, R. Descriptive catalogue of the osteological series contained in the museum of the Royal College of Surgeons of England. Vol. 2 (Taylor and Francis, 1853).
Oreamnos_americanus	Williams, S. A., Spear, J. K., Petrullo, L., Goldstein, D. M., Lee, A. B., Peterson, A. L., Miano, D. A., Kaczmarek, E. B. & Shattuck, M. R. Increased variation in numbers of presacral vertebrae in suspensory mammals. Nat. Ecol. Evol. 3, 949–956 (2019).
Rupicapra_rupicapra	Galis, F., Carrier, D. R., van Alphen, J., van der Mije, S. D., Van Dooren, T. J., Metz, J. A. & ten Broek, C. M. Fast running restricts evolutionary change of the vertebral column in mammals. Proc. Natl. Acad. Sci. USA 111, 11401–11406 (2014).
Ammotragus_lervia	Sánchez‐Villagra, M. R., Narita, Y. & Kuratani, S. Thoracolumbar vertebral number: the first skeletal synapomorphy for afrotherian mammals. Syst. Biodiv. 5, 1–7 (2007).
Connochaetes_taurinus	Narita, Y. & Kuratani, S. Evolution of the vertebral formulae in mammals: a perspective on developmental constraints. J. Exper. Zool. B: Mol. Dev. Evol. 304, 91–106 (2005).
Connochaetes_gnou	Owen, R. Descriptive catalogue of the osteological series contained in the museum of the Royal College of Surgeons of England. Vol. 2 (Taylor and Francis, 1853).
Damaliscus_pygargus	Williams, S. A., Spear, J. K., Petrullo, L., Goldstein, D. M., Lee, A. B., Peterson, A. L., Miano, D. A., Kaczmarek, E. B. & Shattuck, M. R. Increased variation in numbers of presacral vertebrae in suspensory mammals. Nat. Ecol. Evol. 3, 949–956 (2019).
Damaliscus_lunatus	Williams, S. A., Spear, J. K., Petrullo, L., Goldstein, D. M., Lee, A. B., Peterson, A. L., Miano, D. A., Kaczmarek, E. B. & Shattuck, M. R. Increased variation in numbers of presacral vertebrae in suspensory mammals. Nat. Ecol. Evol. 3, 949–956 (2019).
Beatragus_hunteri	Galis, F., Carrier, D. R., van Alphen, J., van der Mije, S. D., Van Dooren, T. J., Metz, J. A. & ten Broek, C. M. Fast running restricts evolutionary change of the vertebral column in mammals. Proc. Natl. Acad. Sci. USA 111, 11401–11406 (2014).
Alcelaphus_buselaphus	Williams, S. A., Spear, J. K., Petrullo, L., Goldstein, D. M., Lee, A. B., Peterson, A. L., Miano, D. A., Kaczmarek, E. B. & Shattuck, M. R. Increased variation in numbers of presacral vertebrae in suspensory mammals. Nat. Ecol. Evol. 3, 949–956 (2019).
Hippotragus_niger	Belyaev, R. I., Kuznetsov, A. N. & Prilepskaya, N. E. How the even‐toed ungulate J. Anat. 239, 1370-1399 (2021).
Hippotragus_equinus	Narita, Y. & Kuratani, S. Evolution of the vertebral formulae in mammals: a perspective on developmental constraints. J. Exper. Zool. B: Mol. Dev. Evol. 304, 91–106 (2005).
Oryx_dammah	Williams, S. A., Spear, J. K., Petrullo, L., Goldstein, D. M., Lee, A. B., Peterson, A. L., Miano, D. A., Kaczmarek, E. B. & Shattuck, M. R. Increased variation in numbers of presacral vertebrae in suspensory mammals. Nat. Ecol. Evol. 3, 949–956 (2019).
Oryx_leucoryx	Williams, S. A., Spear, J. K., Petrullo, L., Goldstein, D. M., Lee, A. B., Peterson, A. L., Miano, D. A., Kaczmarek, E. B. & Shattuck, M. R. Increased variation in numbers of presacral vertebrae in suspensory mammals. Nat. Ecol. Evol. 3, 949–956 (2019).
Oryx_gazella	Williams, S. A., Spear, J. K., Petrullo, L., Goldstein, D. M., Lee, A. B., Peterson, A. L., Miano, D. A., Kaczmarek, E. B. & Shattuck, M. R. Increased variation in numbers of presacral vertebrae in suspensory mammals. Nat. Ecol. Evol. 3, 949–956 (2019).
Oryx_beisa	Williams, S. A., Spear, J. K., Petrullo, L., Goldstein, D. M., Lee, A. B., Peterson, A. L., Miano, D. A., Kaczmarek, E. B. & Shattuck, M. R. Increased variation in numbers of presacral vertebrae in suspensory mammals. Nat. Ecol. Evol. 3, 949–956 (2019).
Rhinopoma_hardwickii	Walton, D. W. & Walton, G. M. Post-cranial osteology of bats. About bats. Fondren Science Series, 11, 93-126 (1970).
Rhinopoma_microphyllum	Walton, D. W. & Walton, G. M. Post-cranial osteology of bats. About bats. Fondren Science Series, 11, 93-126 (1970).
Lavia_frons	Walton, D. W. & Walton, G. M. Post-cranial osteology of bats. About bats. Fondren Science Series, 11, 93-126 (1970).
Megaderma_spasma	Walton, D. W. & Walton, G. M. Post-cranial osteology of bats. About bats. Fondren Science Series, 11, 93-126 (1970).
Rhinolophus_hipposideros	Walton, D. W. & Walton, G. M. Post-cranial osteology of bats. About bats. Fondren Science Series, 11, 93-126 (1970).
Asellia_tridens	Walton, D. W. & Walton, G. M. Post-cranial osteology of bats. About bats. Fondren Science Series, 11, 93-126 (1970).
Hipposideros_caffer	Walton, D. W. & Walton, G. M. Post-cranial osteology of bats. About bats. Fondren Science Series, 11, 93-126 (1970).
Hipposideros_diadema	Walton, D. W. & Walton, G. M. Post-cranial osteology of bats. About bats. Fondren Science Series, 11, 93-126 (1970).
Cynopterus_titthaecheilus	Walton, D. W. & Walton, G. M. Post-cranial osteology of bats. About bats. Fondren Science Series, 11, 93-126 (1970).
Cynopterus_brachyotis	Williams, S. A., Spear, J. K., Petrullo, L., Goldstein, D. M., Lee, A. B., Peterson, A. L., Miano, D. A., Kaczmarek, E. B. & Shattuck, M. R. Increased variation in numbers of presacral vertebrae in suspensory mammals. Nat. Ecol. Evol. 3, 949–956 (2019).
Epomops_franqueti	Walton, D. W. & Walton, G. M. Post-cranial osteology of bats. About bats. Fondren Science Series, 11, 93-126 (1970).
Hypsignathus_monstrosus	Kawashima, T., Thorington Jr, R. W., Bohaska, P. W. & Sato, F. Variability and constraint of vertebral formulae and proportions in colugos, tree shrews, and rodents, with special reference to vertebral modification by aerodynamic adaptation. Folia Morphol. 77, 44-56 (2018).
Rousettus_aegyptiacus	Walton, D. W. & Walton, G. M. Post-cranial osteology of bats. About bats. Fondren Science Series, 11, 93-126 (1970).
Eidolon_helvum	Igado, O. O. & Ade-Julius, E. R. Gross description and osteometrics of the axial skeleton (ribs and vertebrae) of Eidolon Helvum [sic] (African fruit bat). Niger. J. Physiol. Sci. 33, 189-194 (2018).
Pteropus_giganteus	Walton, D. W. & Walton, G. M. Post-cranial osteology of bats. About bats. Fondren Science Series, 11, 93-126 (1970).
Pteropus_rufus	Sánchez‐Villagra, M. R., Narita, Y. & Kuratani, S. Thoracolumbar vertebral number: the first skeletal synapomorphy for afrotherian mammals. Syst. Biodiv. 5, 1–7 (2007).
Pteropus_vampyrus	Kawashima, T., Thorington Jr, R. W., Bohaska, P. W. & Sato, F. Variability and constraint of vertebral formulae and proportions in colugos, tree shrews, and rodents, with special reference to vertebral modification by aerodynamic adaptation. Folia Morphol. 77, 44-56 (2018).
Macroglossus_minimus	Walton, D. W. & Walton, G. M. Post-cranial osteology of bats. About bats. Fondren Science Series, 11, 93-126 (1970).
Myzopoda_aurita	Walton, D. W. & Walton, G. M. Post-cranial osteology of bats. About bats. Fondren Science Series, 11, 93-126 (1970).
Mystacina_tuberculata	Simmons, N. B. & Conway, T. M.. Phylogenetic relationships of mormoopid bats (Chiroptera: Mormoopidae) based on morphological data. Bull. Amer. Mus. Nat. Hist. 258, 1-100 (2001).
Thyroptera_discifera	Wilson, D. E. Thyroptera discifera. Mamm. Spec. 104, 1-3 (1978).
Noctilio_leporinus	Gaudioso, P. J. Morfología y morfometría del esqueleto postcraneal de murciélagos (Mammalia: Chiroptera) de Argentina. Tucuman: Programa Investig. Biodivers. Argent. (PIDBA), Publ Espec. 2, 1-302 (2019).
Pteronotus_parnellii	Buchholtz, E. A., Bailin, H. G., Laves, S. A., Yang, J. T., Chan, M. Y. & Drozd, L. E. Fixed cervical count and the origin of the mammalian diaphragm. Evol. Dev. 14, 399-411 (2012).
Mormoops_megalophylla	Simmons, N. B. & Conway, T. M.. Phylogenetic relationships of mormoopid bats (Chiroptera: Mormoopidae) based on morphological data. Bull. Amer. Mus. Nat. Hist. 258, 1-100 (2001).
Micronycteris_microtis	Gaudioso, P. J., Díaz, M. M. & Barquez, R. M. Morphology of the axial skeleton of seven bat genera (Chiroptera: Phyllostomidae). An. Acad. Bras. Cienc. 89, 2341–2358 (2017).
Anoura_caudifer	Gaudioso, P. J., Díaz, M. M. & Barquez, R. M. Morphology of the axial skeleton of seven bat genera (Chiroptera: Phyllostomidae). An. Acad. Bras. Cienc. 89, 2341–2358 (2017).
Glossophaga_soricina	Walton, D. W. & Walton, G. M. Post-cranial osteology of bats. About bats. Fondren Science Series, 11, 93-126 (1970).
Glossophaga_morenoi	Walton, D. W. & Walton, G. M. Post-cranial osteology of bats. About bats. Fondren Science Series, 11, 93-126 (1970).
Phylloderma_stenops	Walton, D. W. & Walton, G. M. Post-cranial osteology of bats. About bats. Fondren Science Series, 11, 93-126 (1970).
Phyllostomus_discolor	Walton, D. W. & Walton, G. M. Post-cranial osteology of bats. About bats. Fondren Science Series, 11, 93-126 (1970).
Lonchorhina_inusitata	Walton, D. W. & Walton, G. M. Post-cranial osteology of bats. About bats. Fondren Science Series, 11, 93-126 (1970).
Chrotopterus_auritus	Gaudioso, P. J. Morfología y morfometría del esqueleto postcraneal de murciélagos (Mammalia: Chiroptera) de Argentina. Tucuman: Programa Investig. Biodivers. Argent. (PIDBA), Publ Espec. 2, 1-302 (2019).
Vampyrum_spectrum	Walton, D. W. & Walton, G. M. Post-cranial osteology of bats. About bats. Fondren Science Series, 11, 93-126 (1970).
Lonchophylla_inexpectata	Walton, D. W. & Walton, G. M. Post-cranial osteology of bats. About bats. Fondren Science Series, 11, 93-126 (1970).
Carollia_perspicillata	Walton, D. W. & Walton, G. M. Post-cranial osteology of bats. About bats. Fondren Science Series, 11, 93-126 (1970).
Artibeus_jamaicensis	Kawashima, T., Thorington Jr, R. W., Bohaska, P. W. & Sato, F. Variability and constraint of vertebral formulae and proportions in colugos, tree shrews, and rodents, with special reference to vertebral modification by aerodynamic adaptation. Folia Morphol. 77, 44-56 (2018).
Artibeus_planirostris	Gaudioso, P. J., Díaz, M. M. & Barquez, R. M. Morphology of the axial skeleton of seven bat genera (Chiroptera: Phyllostomidae). An. Acad. Bras. Cienc. 89, 2341–2358 (2017).
Pygoderma_bilabiatum	Walton, D. W. & Walton, G. M. Post-cranial osteology of bats. About bats. Fondren Science Series, 11, 93-126 (1970).
Vampyressa_pusilla	Walton, D. W. & Walton, G. M. Post-cranial osteology of bats. About bats. Fondren Science Series, 11, 93-126 (1970).
Sturnira_erythromos	Gaudioso, P. J., Díaz, M. M. & Barquez, R. M. Morphology of the axial skeleton of seven bat genera (Chiroptera: Phyllostomidae). An. Acad. Bras. Cienc. 89, 2341–2358 (2017).
Sturnira_aratathomasi	Walton, D. W. & Walton, G. M. Post-cranial osteology of bats. About bats. Fondren Science Series, 11, 93-126 (1970).
Rhinophylla_pumilio	Walton, D. W. & Walton, G. M. Post-cranial osteology of bats. About bats. Fondren Science Series, 11, 93-126 (1970).
Lonchorhina_orinocensis	Walton, D. W. & Walton, G. M. Post-cranial osteology of bats. About bats. Fondren Science Series, 11, 93-126 (1970).
Lonchorhina_fernandezi	Walton, D. W. & Walton, G. M. Post-cranial osteology of bats. About bats. Fondren Science Series, 11, 93-126 (1970).
Lonchorhina_marinkellei	Walton, D. W. & Walton, G. M. Post-cranial osteology of bats. About bats. Fondren Science Series, 11, 93-126 (1970).
Lonchorhina_aurita	Walton, D. W. & Walton, G. M. Post-cranial osteology of bats. About bats. Fondren Science Series, 11, 93-126 (1970).
Diphylla_ecaudata	Walton, D. W. & Walton, G. M. Post-cranial osteology of bats. About bats. Fondren Science Series, 11, 93-126 (1970).
Desmodus_rotundus	Gaudioso, P. J., Díaz, M. M. & Barquez, R. M. Morphology of the axial skeleton of seven bat genera (Chiroptera: Phyllostomidae). An. Acad. Bras. Cienc. 89, 2341–2358 (2017).
Diaemus_youngi	Gaudioso, P. J., Díaz, M. M. & Barquez, R. M. Morphology of the axial skeleton of seven bat genera (Chiroptera: Phyllostomidae). An. Acad. Bras. Cienc. 89, 2341–2358 (2017).
Macrotus_waterhousii	Walton, D. W. & Walton, G. M. Post-cranial osteology of bats. About bats. Fondren Science Series, 11, 93-126 (1970).
Macrotus_californicus	Walton, D. W. & Walton, G. M. Post-cranial osteology of bats. About bats. Fondren Science Series, 11, 93-126 (1970).
Nyctinomops_macrotis	Walton, D. W. & Walton, G. M. Post-cranial osteology of bats. About bats. Fondren Science Series, 11, 93-126 (1970).
Molossus_molossus	Walton, D. W. & Walton, G. M. Post-cranial osteology of bats. About bats. Fondren Science Series, 11, 93-126 (1970).
Promops_nasutus	Walton, D. W. & Walton, G. M. Post-cranial osteology of bats. About bats. Fondren Science Series, 11, 93-126 (1970).
Molossops_temminckii	Walton, D. W. & Walton, G. M. Post-cranial osteology of bats. About bats. Fondren Science Series, 11, 93-126 (1970).
Cynomops_planirostris	Walton, D. W. & Walton, G. M. Post-cranial osteology of bats. About bats. Fondren Science Series, 11, 93-126 (1970).
Eumops_perotis	Walton, D. W. & Walton, G. M. Post-cranial osteology of bats. About bats. Fondren Science Series, 11, 93-126 (1970).
Tadarida_brasiliensis	Gaudioso, P. J. Morfología y morfometría del esqueleto postcraneal de murciélagos (Mammalia: Chiroptera) de Argentina. Tucuman: Programa Investig. Biodivers. Argent. (PIDBA), Publ Espec. 2, 1-302 (2019).
Molossus_currentium	Walton, D. W. & Walton, G. M. Post-cranial osteology of bats. About bats. Fondren Science Series, 11, 93-126 (1970).
Myotis_daubentonii	Walton, D. W. & Walton, G. M. Post-cranial osteology of bats. About bats. Fondren Science Series, 11, 93-126 (1970).
Myotis_keaysi	Walton, D. W. & Walton, G. M. Post-cranial osteology of bats. About bats. Fondren Science Series, 11, 93-126 (1970).
Myotis_velifer	Walton, D. W. & Walton, G. M. Post-cranial osteology of bats. About bats. Fondren Science Series, 11, 93-126 (1970).
Myotis_chiloensis	Walton, D. W. & Walton, G. M. Post-cranial osteology of bats. About bats. Fondren Science Series, 11, 93-126 (1970).
Myotis_lucifugus	Walton, D. W. & Walton, G. M. Post-cranial osteology of bats. About bats. Fondren Science Series, 11, 93-126 (1970).
Myotis_evotis	Walton, D. W. & Walton, G. M. Post-cranial osteology of bats. About bats. Fondren Science Series, 11, 93-126 (1970).
Eptesicus_nilssonii	Walton, D. W. & Walton, G. M. Post-cranial osteology of bats. About bats. Fondren Science Series, 11, 93-126 (1970).
Eptesicus_serotinus	Walton, D. W. & Walton, G. M. Post-cranial osteology of bats. About bats. Fondren Science Series, 11, 93-126 (1970).
Histiotus_montanus	Walton, D. W. & Walton, G. M. Post-cranial osteology of bats. About bats. Fondren Science Series, 11, 93-126 (1970).
Histiotus_magellanicus	Walton, D. W. & Walton, G. M. Post-cranial osteology of bats. About bats. Fondren Science Series, 11, 93-126 (1970).
Eptesicus_diminutus	Walton, D. W. & Walton, G. M. Post-cranial osteology of bats. About bats. Fondren Science Series, 11, 93-126 (1970).
Lasionycteris_noctivagans	Walton, D. W. & Walton, G. M. Post-cranial osteology of bats. About bats. Fondren Science Series, 11, 93-126 (1970).
Pipistrellus_pipistrellus	Walton, D. W. & Walton, G. M. Post-cranial osteology of bats. About bats. Fondren Science Series, 11, 93-126 (1970).
Nyctalus_noctula	Walton, D. W. & Walton, G. M. Post-cranial osteology of bats. About bats. Fondren Science Series, 11, 93-126 (1970).
Vespertilio_murinus	Narita, Y. & Kuratani, S. Evolution of the vertebral formulae in mammals: a perspective on developmental constraints. J. Exper. Zool. B: Mol. Dev. Evol. 304, 91–106 (2005).
Chalinolobus_tuberculatus	Walton, D. W. & Walton, G. M. Post-cranial osteology of bats. About bats. Fondren Science Series, 11, 93-126 (1970).
Neoromicia_nana	Walton, D. W. & Walton, G. M. Post-cranial osteology of bats. About bats. Fondren Science Series, 11, 93-126 (1970).
Lasiurus_cinereus	Gaudioso, P. J. Morfología y morfometría del esqueleto postcraneal de murciélagos (Mammalia: Chiroptera) de Argentina. Tucuman: Programa Investig. Biodivers. Argent. (PIDBA), Publ Espec. 2, 1-302 (2019).
Lasiurus_ega	Gaudioso, P. J. Morfología y morfometría del esqueleto postcraneal de murciélagos (Mammalia: Chiroptera) de Argentina. Tucuman: Programa Investig. Biodivers. Argent. (PIDBA), Publ Espec. 2, 1-302 (2019).
Antrozous_pallidus	Walton, D. W. & Walton, G. M. Post-cranial osteology of bats. About bats. Fondren Science Series, 11, 93-126 (1970).
Otonycteris_hemprichii	Gharaibeh, B. M. & Qumsiyeh, M. B. Otonycteris hemprichii. Mamm. Spec. 514, 1-4 (1995).
Plecotus_auritus	Walton, D. W. & Walton, G. M. Post-cranial osteology of bats. About bats. Fondren Science Series, 11, 93-126 (1970).
Euderma_maculatum	Walton, D. W. & Walton, G. M. Post-cranial osteology of bats. About bats. Fondren Science Series, 11, 93-126 (1970).
Barbastella_barbastellus	Rydell, J. & Bogdanowicz, W. Barbastella barbastellus. Mamm. Spec. 557, 1-8 (1997).
Miniopterus_schreibersii	Walton, D. W. & Walton, G. M. Post-cranial osteology of bats. About bats. Fondren Science Series, 11, 93-126 (1970).
Nycteris_javanica	Walton, D. W. & Walton, G. M. Post-cranial osteology of bats. About bats. Fondren Science Series, 11, 93-126 (1970).
Nycteris_thebaica	Walton, D. W. & Walton, G. M. Post-cranial osteology of bats. About bats. Fondren Science Series, 11, 93-126 (1970).
Saccopteryx_bilineata	Walton, D. W. & Walton, G. M. Post-cranial osteology of bats. About bats. Fondren Science Series, 11, 93-126 (1970).
Peropteryx_leucoptera	Walton, D. W. & Walton, G. M. Post-cranial osteology of bats. About bats. Fondren Science Series, 11, 93-126 (1970).
Balantiopteryx_plicata	Walton, D. W. & Walton, G. M. Post-cranial osteology of bats. About bats. Fondren Science Series, 11, 93-126 (1970).
Galeopterus_variegatus	Kawashima, T., Thorington Jr, R. W., Bohaska, P. W. & Sato, F. Variability and constraint of vertebral formulae and proportions in colugos, tree shrews, and rodents, with special reference to vertebral modification by aerodynamic adaptation. Folia Morphol. 77, 44-56 (2018).
Cynocephalus_volans	Sánchez‐Villagra, M. R., Narita, Y. & Kuratani, S. Thoracolumbar vertebral number: the first skeletal synapomorphy for afrotherian mammals. Syst. Biodiv. 5, 1–7 (2007).
Nycticebus_coucang	Williams, S. A., Spear, J. K., Petrullo, L., Goldstein, D. M., Lee, A. B., Peterson, A. L., Miano, D. A., Kaczmarek, E. B. & Shattuck, M. R. Increased variation in numbers of presacral vertebrae in suspensory mammals. Nat. Ecol. Evol. 3, 949–956 (2019).
Loris_tardigradus	Williams, S. A., Spear, J. K., Petrullo, L., Goldstein, D. M., Lee, A. B., Peterson, A. L., Miano, D. A., Kaczmarek, E. B. & Shattuck, M. R. Increased variation in numbers of presacral vertebrae in suspensory mammals. Nat. Ecol. Evol. 3, 949–956 (2019).
Otolemur_garnettii	Williams, S. A., Spear, J. K., Petrullo, L., Goldstein, D. M., Lee, A. B., Peterson, A. L., Miano, D. A., Kaczmarek, E. B. & Shattuck, M. R. Increased variation in numbers of presacral vertebrae in suspensory mammals. Nat. Ecol. Evol. 3, 949–956 (2019).
Otolemur_crassicaudatus	Williams, S. A., Spear, J. K., Petrullo, L., Goldstein, D. M., Lee, A. B., Peterson, A. L., Miano, D. A., Kaczmarek, E. B. & Shattuck, M. R. Increased variation in numbers of presacral vertebrae in suspensory mammals. Nat. Ecol. Evol. 3, 949–956 (2019).
Galago_senegalensis	Schultz, A. H & Straus, W. L. Jr. The numbers of vertebrae in primates. Proc. Amer. Phil. Soc. 89, 601–626 (1945).
Euoticus_elegantulus	Williams, S. A., Spear, J. K., Petrullo, L., Goldstein, D. M., Lee, A. B., Peterson, A. L., Miano, D. A., Kaczmarek, E. B. & Shattuck, M. R. Increased variation in numbers of presacral vertebrae in suspensory mammals. Nat. Ecol. Evol. 3, 949–956 (2019).
Perodicticus_potto	Williams, S. A., Spear, J. K., Petrullo, L., Goldstein, D. M., Lee, A. B., Peterson, A. L., Miano, D. A., Kaczmarek, E. B. & Shattuck, M. R. Increased variation in numbers of presacral vertebrae in suspensory mammals. Nat. Ecol. Evol. 3, 949–956 (2019).
Arctocebus_calabarensis	Williams, S. A., Spear, J. K., Petrullo, L., Goldstein, D. M., Lee, A. B., Peterson, A. L., Miano, D. A., Kaczmarek, E. B. & Shattuck, M. R. Increased variation in numbers of presacral vertebrae in suspensory mammals. Nat. Ecol. Evol. 3, 949–956 (2019).
Daubentonia_madagascariensis	Sánchez‐Villagra, M. R., Narita, Y. & Kuratani, S. Thoracolumbar vertebral number: the first skeletal synapomorphy for afrotherian mammals. Syst. Biodiv. 5, 1–7 (2007).
Indri_indri	Williams, S. A., Spear, J. K., Petrullo, L., Goldstein, D. M., Lee, A. B., Peterson, A. L., Miano, D. A., Kaczmarek, E. B. & Shattuck, M. R. Increased variation in numbers of presacral vertebrae in suspensory mammals. Nat. Ecol. Evol. 3, 949–956 (2019).
Propithecus_diadema	Williams, S. A., Spear, J. K., Petrullo, L., Goldstein, D. M., Lee, A. B., Peterson, A. L., Miano, D. A., Kaczmarek, E. B. & Shattuck, M. R. Increased variation in numbers of presacral vertebrae in suspensory mammals. Nat. Ecol. Evol. 3, 949–956 (2019).
Propithecus_verreauxi	Williams, S. A., Spear, J. K., Petrullo, L., Goldstein, D. M., Lee, A. B., Peterson, A. L., Miano, D. A., Kaczmarek, E. B. & Shattuck, M. R. Increased variation in numbers of presacral vertebrae in suspensory mammals. Nat. Ecol. Evol. 3, 949–956 (2019).
Propithecus_coquereli	Williams, S. A., Spear, J. K., Petrullo, L., Goldstein, D. M., Lee, A. B., Peterson, A. L., Miano, D. A., Kaczmarek, E. B. & Shattuck, M. R. Increased variation in numbers of presacral vertebrae in suspensory mammals. Nat. Ecol. Evol. 3, 949–956 (2019).
Avahi_laniger	Sánchez‐Villagra, M. R., Narita, Y. & Kuratani, S. Thoracolumbar vertebral number: the first skeletal synapomorphy for afrotherian mammals. Syst. Biodiv. 5, 1–7 (2007).
Varecia_variegata	Schultz, A. H & Straus, W. L. Jr. The numbers of vertebrae in primates. Proc. Amer. Phil. Soc. 89, 601–626 (1945).
Lemur_catta	Williams, S. A., Spear, J. K., Petrullo, L., Goldstein, D. M., Lee, A. B., Peterson, A. L., Miano, D. A., Kaczmarek, E. B. & Shattuck, M. R. Increased variation in numbers of presacral vertebrae in suspensory mammals. Nat. Ecol. Evol. 3, 949–956 (2019).
Hapalemur_griseus	Schultz, A. H & Straus, W. L. Jr. The numbers of vertebrae in primates. Proc. Amer. Phil. Soc. 89, 601–626 (1945).
Eulemur_macaco	Williams, S. A., Spear, J. K., Petrullo, L., Goldstein, D. M., Lee, A. B., Peterson, A. L., Miano, D. A., Kaczmarek, E. B. & Shattuck, M. R. Increased variation in numbers of presacral vertebrae in suspensory mammals. Nat. Ecol. Evol. 3, 949–956 (2019).
Eulemur_rubriventer	Williams, S. A., Spear, J. K., Petrullo, L., Goldstein, D. M., Lee, A. B., Peterson, A. L., Miano, D. A., Kaczmarek, E. B. & Shattuck, M. R. Increased variation in numbers of presacral vertebrae in suspensory mammals. Nat. Ecol. Evol. 3, 949–956 (2019).
Eulemur_mongoz	Williams, S. A., Spear, J. K., Petrullo, L., Goldstein, D. M., Lee, A. B., Peterson, A. L., Miano, D. A., Kaczmarek, E. B. & Shattuck, M. R. Increased variation in numbers of presacral vertebrae in suspensory mammals. Nat. Ecol. Evol. 3, 949–956 (2019).
Eulemur_collaris	Williams, S. A., Spear, J. K., Petrullo, L., Goldstein, D. M., Lee, A. B., Peterson, A. L., Miano, D. A., Kaczmarek, E. B. & Shattuck, M. R. Increased variation in numbers of presacral vertebrae in suspensory mammals. Nat. Ecol. Evol. 3, 949–956 (2019).
Eulemur_fulvus	Asher, R. J., Lin, K. H., Kardjilov, N. & Hautier, L. Variability and constraint in the mammalian vertebral column. J. Evol. Biol. 24, 1080-1090 (2011).
Eulemur_sanfordi	Williams, S. A., Spear, J. K., Petrullo, L., Goldstein, D. M., Lee, A. B., Peterson, A. L., Miano, D. A., Kaczmarek, E. B. & Shattuck, M. R. Increased variation in numbers of presacral vertebrae in suspensory mammals. Nat. Ecol. Evol. 3, 949–956 (2019).
Eulemur_albifrons	Williams, S. A., Spear, J. K., Petrullo, L., Goldstein, D. M., Lee, A. B., Peterson, A. L., Miano, D. A., Kaczmarek, E. B. & Shattuck, M. R. Increased variation in numbers of presacral vertebrae in suspensory mammals. Nat. Ecol. Evol. 3, 949–956 (2019).
Lepilemur_mustelinus	Asher, R. J., Lin, K. H., Kardjilov, N. & Hautier, L. Variability and constraint in the mammalian vertebral column. J. Evol. Biol. 24, 1080-1090 (2011).
Cheirogaleus_medius	Schultz, A. H & Straus, W. L. Jr. The numbers of vertebrae in primates. Proc. Amer. Phil. Soc. 89, 601–626 (1945).
Microcebus_murinus	Schultz, A. H & Straus, W. L. Jr. The numbers of vertebrae in primates. Proc. Amer. Phil. Soc. 89, 601–626 (1945).
Microcebus_rufus	Schultz, A. H & Straus, W. L. Jr. The numbers of vertebrae in primates. Proc. Amer. Phil. Soc. 89, 601–626 (1945).
Tarsius_syrichta	Schultz, A. H & Straus, W. L. Jr. The numbers of vertebrae in primates. Proc. Amer. Phil. Soc. 89, 601–626 (1945).
Pithecia_irrorata	Williams, S. A., Spear, J. K., Petrullo, L., Goldstein, D. M., Lee, A. B., Peterson, A. L., Miano, D. A., Kaczmarek, E. B. & Shattuck, M. R. Increased variation in numbers of presacral vertebrae in suspensory mammals. Nat. Ecol. Evol. 3, 949–956 (2019).
Pithecia_monachus	Williams, S. A., Spear, J. K., Petrullo, L., Goldstein, D. M., Lee, A. B., Peterson, A. L., Miano, D. A., Kaczmarek, E. B. & Shattuck, M. R. Increased variation in numbers of presacral vertebrae in suspensory mammals. Nat. Ecol. Evol. 3, 949–956 (2019).
Pithecia_pithecia	Williams, S. A., Spear, J. K., Petrullo, L., Goldstein, D. M., Lee, A. B., Peterson, A. L., Miano, D. A., Kaczmarek, E. B. & Shattuck, M. R. Increased variation in numbers of presacral vertebrae in suspensory mammals. Nat. Ecol. Evol. 3, 949–956 (2019).
Cacajao_melanocephalus	Barnett, A. A. Cacajao melanocephalus. Mamm. Spec. 776, 1-6 (2005).
Callicebus_moloch	Jones, C. & Anderson, S. Callicebus moloch. Mamm. Spec. 112, 1-5 (1978).
Leontocebus_nigricollis	Schultz, A. H & Straus, W. L. Jr. The numbers of vertebrae in primates. Proc. Amer. Phil. Soc. 89, 601–626 (1945).
Saguinus_oedipus	Williams, S. A., Spear, J. K., Petrullo, L., Goldstein, D. M., Lee, A. B., Peterson, A. L., Miano, D. A., Kaczmarek, E. B. & Shattuck, M. R. Increased variation in numbers of presacral vertebrae in suspensory mammals. Nat. Ecol. Evol. 3, 949–956 (2019).
Leontopithecus_rosalia	Schultz, A. H & Straus, W. L. Jr. The numbers of vertebrae in primates. Proc. Amer. Phil. Soc. 89, 601–626 (1945).
Mico_humeralifer	Schultz, A. H & Straus, W. L. Jr. The numbers of vertebrae in primates. Proc. Amer. Phil. Soc. 89, 601–626 (1945).
Callithrix_jacchus	Williams, S. A., Spear, J. K., Petrullo, L., Goldstein, D. M., Lee, A. B., Peterson, A. L., Miano, D. A., Kaczmarek, E. B. & Shattuck, M. R. Increased variation in numbers of presacral vertebrae in suspensory mammals. Nat. Ecol. Evol. 3, 949–956 (2019).
Cebuella_pygmaea	Schultz, A. H & Straus, W. L. Jr. The numbers of vertebrae in primates. Proc. Amer. Phil. Soc. 89, 601–626 (1945).
Saimiri_sciureus	Williams, S. A., Spear, J. K., Petrullo, L., Goldstein, D. M., Lee, A. B., Peterson, A. L., Miano, D. A., Kaczmarek, E. B. & Shattuck, M. R. Increased variation in numbers of presacral vertebrae in suspensory mammals. Nat. Ecol. Evol. 3, 949–956 (2019).
Cebus_olivaceus	Schultz, A. H & Straus, W. L. Jr. The numbers of vertebrae in primates. Proc. Amer. Phil. Soc. 89, 601–626 (1945).
Cebus_albifrons	Williams, S. A., Spear, J. K., Petrullo, L., Goldstein, D. M., Lee, A. B., Peterson, A. L., Miano, D. A., Kaczmarek, E. B. & Shattuck, M. R. Increased variation in numbers of presacral vertebrae in suspensory mammals. Nat. Ecol. Evol. 3, 949–956 (2019).
Cebus_capucinus	Williams, S. A., Spear, J. K., Petrullo, L., Goldstein, D. M., Lee, A. B., Peterson, A. L., Miano, D. A., Kaczmarek, E. B. & Shattuck, M. R. Increased variation in numbers of presacral vertebrae in suspensory mammals. Nat. Ecol. Evol. 3, 949–956 (2019).
Aotus_azarae	Williams, S. A., Spear, J. K., Petrullo, L., Goldstein, D. M., Lee, A. B., Peterson, A. L., Miano, D. A., Kaczmarek, E. B. & Shattuck, M. R. Increased variation in numbers of presacral vertebrae in suspensory mammals. Nat. Ecol. Evol. 3, 949–956 (2019).
Aotus_nancymaae	Williams, S. A., Spear, J. K., Petrullo, L., Goldstein, D. M., Lee, A. B., Peterson, A. L., Miano, D. A., Kaczmarek, E. B. & Shattuck, M. R. Increased variation in numbers of presacral vertebrae in suspensory mammals. Nat. Ecol. Evol. 3, 949–956 (2019).
Alouatta_seniculus	Schultz, A. H & Straus, W. L. Jr. The numbers of vertebrae in primates. Proc. Amer. Phil. Soc. 89, 601–626 (1945).
Alouatta_caraya	Schultz, A. H & Straus, W. L. Jr. The numbers of vertebrae in primates. Proc. Amer. Phil. Soc. 89, 601–626 (1945).
Alouatta_palliata	Schultz, A. H & Straus, W. L. Jr. The numbers of vertebrae in primates. Proc. Amer. Phil. Soc. 89, 601–626 (1945).
Alouatta_pigra	Schultz, A. H & Straus, W. L. Jr. The numbers of vertebrae in primates. Proc. Amer. Phil. Soc. 89, 601–626 (1945).
Lagothrix_lagotricha	Williams, S. A., Spear, J. K., Petrullo, L., Goldstein, D. M., Lee, A. B., Peterson, A. L., Miano, D. A., Kaczmarek, E. B. & Shattuck, M. R. Increased variation in numbers of presacral vertebrae in suspensory mammals. Nat. Ecol. Evol. 3, 949–956 (2019).
Brachyteles_hypoxanthus	Schultz, A. H & Straus, W. L. Jr. The numbers of vertebrae in primates. Proc. Amer. Phil. Soc. 89, 601–626 (1945).
Brachyteles_arachnoides	Schultz, A. H & Straus, W. L. Jr. The numbers of vertebrae in primates. Proc. Amer. Phil. Soc. 89, 601–626 (1945).
Ateles_geoffroyi	Williams, S. A., Spear, J. K., Petrullo, L., Goldstein, D. M., Lee, A. B., Peterson, A. L., Miano, D. A., Kaczmarek, E. B. & Shattuck, M. R. Increased variation in numbers of presacral vertebrae in suspensory mammals. Nat. Ecol. Evol. 3, 949–956 (2019).
Ateles_fusciceps	Williams, S. A., Spear, J. K., Petrullo, L., Goldstein, D. M., Lee, A. B., Peterson, A. L., Miano, D. A., Kaczmarek, E. B. & Shattuck, M. R. Increased variation in numbers of presacral vertebrae in suspensory mammals. Nat. Ecol. Evol. 3, 949–956 (2019).
Ateles_paniscus	Williams, S. A., Spear, J. K., Petrullo, L., Goldstein, D. M., Lee, A. B., Peterson, A. L., Miano, D. A., Kaczmarek, E. B. & Shattuck, M. R. Increased variation in numbers of presacral vertebrae in suspensory mammals. Nat. Ecol. Evol. 3, 949–956 (2019).
Ateles_chamek	Williams, S. A., Spear, J. K., Petrullo, L., Goldstein, D. M., Lee, A. B., Peterson, A. L., Miano, D. A., Kaczmarek, E. B. & Shattuck, M. R. Increased variation in numbers of presacral vertebrae in suspensory mammals. Nat. Ecol. Evol. 3, 949–956 (2019).
Ateles_belzebuth	Williams, S. A., Spear, J. K., Petrullo, L., Goldstein, D. M., Lee, A. B., Peterson, A. L., Miano, D. A., Kaczmarek, E. B. & Shattuck, M. R. Increased variation in numbers of presacral vertebrae in suspensory mammals. Nat. Ecol. Evol. 3, 949–956 (2019).
Symphalangus_syndactylus	Williams, S. A., Spear, J. K., Petrullo, L., Goldstein, D. M., Lee, A. B., Peterson, A. L., Miano, D. A., Kaczmarek, E. B. & Shattuck, M. R. Increased variation in numbers of presacral vertebrae in suspensory mammals. Nat. Ecol. Evol. 3, 949–956 (2019).
Hylobates_pileatus	Schultz, A. H & Straus, W. L. Jr. The numbers of vertebrae in primates. Proc. Amer. Phil. Soc. 89, 601–626 (1945).
Hylobates_lar	Williams, S. A., Spear, J. K., Petrullo, L., Goldstein, D. M., Lee, A. B., Peterson, A. L., Miano, D. A., Kaczmarek, E. B. & Shattuck, M. R. Increased variation in numbers of presacral vertebrae in suspensory mammals. Nat. Ecol. Evol. 3, 949–956 (2019).
Hylobates_muelleri	Schultz, A. H & Straus, W. L. Jr. The numbers of vertebrae in primates. Proc. Amer. Phil. Soc. 89, 601–626 (1945).
Hylobates_moloch	Williams, S. A., Spear, J. K., Petrullo, L., Goldstein, D. M., Lee, A. B., Peterson, A. L., Miano, D. A., Kaczmarek, E. B. & Shattuck, M. R. Increased variation in numbers of presacral vertebrae in suspensory mammals. Nat. Ecol. Evol. 3, 949–956 (2019).
Hylobates_klossii	Schultz, A. H & Straus, W. L. Jr. The numbers of vertebrae in primates. Proc. Amer. Phil. Soc. 89, 601–626 (1945).
Hylobates_agilis	Williams, S. A., Spear, J. K., Petrullo, L., Goldstein, D. M., Lee, A. B., Peterson, A. L., Miano, D. A., Kaczmarek, E. B. & Shattuck, M. R. Increased variation in numbers of presacral vertebrae in suspensory mammals. Nat. Ecol. Evol. 3, 949–956 (2019).
Nomascus_concolor	Williams, S. A., Spear, J. K., Petrullo, L., Goldstein, D. M., Lee, A. B., Peterson, A. L., Miano, D. A., Kaczmarek, E. B. & Shattuck, M. R. Increased variation in numbers of presacral vertebrae in suspensory mammals. Nat. Ecol. Evol. 3, 949–956 (2019).
Nomascus_gabriellae	Schultz, A. H & Straus, W. L. Jr. The numbers of vertebrae in primates. Proc. Amer. Phil. Soc. 89, 601–626 (1945).
Nomascus_leucogenys	Schultz, A. H & Straus, W. L. Jr. The numbers of vertebrae in primates. Proc. Amer. Phil. Soc. 89, 601–626 (1945).
Hoolock_hoolock	Williams, S. A., Spear, J. K., Petrullo, L., Goldstein, D. M., Lee, A. B., Peterson, A. L., Miano, D. A., Kaczmarek, E. B. & Shattuck, M. R. Increased variation in numbers of presacral vertebrae in suspensory mammals. Nat. Ecol. Evol. 3, 949–956 (2019).
Pongo_pygmaeus	Williams, S. A., Spear, J. K., Petrullo, L., Goldstein, D. M., Lee, A. B., Peterson, A. L., Miano, D. A., Kaczmarek, E. B. & Shattuck, M. R. Increased variation in numbers of presacral vertebrae in suspensory mammals. Nat. Ecol. Evol. 3, 949–956 (2019).
Pongo_abelii	Williams, S. A., Spear, J. K., Petrullo, L., Goldstein, D. M., Lee, A. B., Peterson, A. L., Miano, D. A., Kaczmarek, E. B. & Shattuck, M. R. Increased variation in numbers of presacral vertebrae in suspensory mammals. Nat. Ecol. Evol. 3, 949–956 (2019).
Pan_troglodytes	Williams, S. A., Spear, J. K., Petrullo, L., Goldstein, D. M., Lee, A. B., Peterson, A. L., Miano, D. A., Kaczmarek, E. B. & Shattuck, M. R. Increased variation in numbers of presacral vertebrae in suspensory mammals. Nat. Ecol. Evol. 3, 949–956 (2019).
Pan_paniscus	Williams, S. A., Spear, J. K., Petrullo, L., Goldstein, D. M., Lee, A. B., Peterson, A. L., Miano, D. A., Kaczmarek, E. B. & Shattuck, M. R. Increased variation in numbers of presacral vertebrae in suspensory mammals. Nat. Ecol. Evol. 3, 949–956 (2019).
Homo_sapiens	Williams, S. A., Spear, J. K., Petrullo, L., Goldstein, D. M., Lee, A. B., Peterson, A. L., Miano, D. A., Kaczmarek, E. B. & Shattuck, M. R. Increased variation in numbers of presacral vertebrae in suspensory mammals. Nat. Ecol. Evol. 3, 949–956 (2019).
Gorilla_gorilla	Williams, S. A., Spear, J. K., Petrullo, L., Goldstein, D. M., Lee, A. B., Peterson, A. L., Miano, D. A., Kaczmarek, E. B. & Shattuck, M. R. Increased variation in numbers of presacral vertebrae in suspensory mammals. Nat. Ecol. Evol. 3, 949–956 (2019).
Gorilla_beringei	Williams, S. A., Spear, J. K., Petrullo, L., Goldstein, D. M., Lee, A. B., Peterson, A. L., Miano, D. A., Kaczmarek, E. B. & Shattuck, M. R. Increased variation in numbers of presacral vertebrae in suspensory mammals. Nat. Ecol. Evol. 3, 949–956 (2019).
Semnopithecus_schistaceus	Schultz, A. H & Straus, W. L. Jr. The numbers of vertebrae in primates. Proc. Amer. Phil. Soc. 89, 601–626 (1945).
Trachypithecus_cristatus	Williams, S. A., Spear, J. K., Petrullo, L., Goldstein, D. M., Lee, A. B., Peterson, A. L., Miano, D. A., Kaczmarek, E. B. & Shattuck, M. R. Increased variation in numbers of presacral vertebrae in suspensory mammals. Nat. Ecol. Evol. 3, 949–956 (2019).
Trachypithecus_phayrei	Williams, S. A., Spear, J. K., Petrullo, L., Goldstein, D. M., Lee, A. B., Peterson, A. L., Miano, D. A., Kaczmarek, E. B. & Shattuck, M. R. Increased variation in numbers of presacral vertebrae in suspensory mammals. Nat. Ecol. Evol. 3, 949–956 (2019).
Semnopithecus_entellus	Narita, Y. & Kuratani, S. Evolution of the vertebral formulae in mammals: a perspective on developmental constraints. J. Exper. Zool. B: Mol. Dev. Evol. 304, 91–106 (2005).
Presbytis_rubicunda	Williams, S. A., Spear, J. K., Petrullo, L., Goldstein, D. M., Lee, A. B., Peterson, A. L., Miano, D. A., Kaczmarek, E. B. & Shattuck, M. R. Increased variation in numbers of presacral vertebrae in suspensory mammals. Nat. Ecol. Evol. 3, 949–956 (2019).
Presbytis_melalophos	Williams, S. A., Spear, J. K., Petrullo, L., Goldstein, D. M., Lee, A. B., Peterson, A. L., Miano, D. A., Kaczmarek, E. B. & Shattuck, M. R. Increased variation in numbers of presacral vertebrae in suspensory mammals. Nat. Ecol. Evol. 3, 949–956 (2019).
Rhinopithecus_bieti	Schultz, A. H & Straus, W. L. Jr. The numbers of vertebrae in primates. Proc. Amer. Phil. Soc. 89, 601–626 (1945).
Rhinopithecus_roxellana	Schultz, A. H & Straus, W. L. Jr. The numbers of vertebrae in primates. Proc. Amer. Phil. Soc. 89, 601–626 (1945).
Nasalis_larvatus	Williams, S. A., Spear, J. K., Petrullo, L., Goldstein, D. M., Lee, A. B., Peterson, A. L., Miano, D. A., Kaczmarek, E. B. & Shattuck, M. R. Increased variation in numbers of presacral vertebrae in suspensory mammals. Nat. Ecol. Evol. 3, 949–956 (2019).
Colobus_guereza	Schultz, A. H & Straus, W. L. Jr. The numbers of vertebrae in primates. Proc. Amer. Phil. Soc. 89, 601–626 (1945).
Colobus_vellerosus	Schultz, A. H & Straus, W. L. Jr. The numbers of vertebrae in primates. Proc. Amer. Phil. Soc. 89, 601–626 (1945).
Macaca_leonina	Williams, S. A., Spear, J. K., Petrullo, L., Goldstein, D. M., Lee, A. B., Peterson, A. L., Miano, D. A., Kaczmarek, E. B. & Shattuck, M. R. Increased variation in numbers of presacral vertebrae in suspensory mammals. Nat. Ecol. Evol. 3, 949–956 (2019).
Macaca_sinica	Williams, S. A., Spear, J. K., Petrullo, L., Goldstein, D. M., Lee, A. B., Peterson, A. L., Miano, D. A., Kaczmarek, E. B. & Shattuck, M. R. Increased variation in numbers of presacral vertebrae in suspensory mammals. Nat. Ecol. Evol. 3, 949–956 (2019).
Macaca_silenus	Williams, S. A., Spear, J. K., Petrullo, L., Goldstein, D. M., Lee, A. B., Peterson, A. L., Miano, D. A., Kaczmarek, E. B. & Shattuck, M. R. Increased variation in numbers of presacral vertebrae in suspensory mammals. Nat. Ecol. Evol. 3, 949–956 (2019).
Macaca_nemestrina	Williams, S. A., Spear, J. K., Petrullo, L., Goldstein, D. M., Lee, A. B., Peterson, A. L., Miano, D. A., Kaczmarek, E. B. & Shattuck, M. R. Increased variation in numbers of presacral vertebrae in suspensory mammals. Nat. Ecol. Evol. 3, 949–956 (2019).
Macaca_maura	Williams, S. A., Spear, J. K., Petrullo, L., Goldstein, D. M., Lee, A. B., Peterson, A. L., Miano, D. A., Kaczmarek, E. B. & Shattuck, M. R. Increased variation in numbers of presacral vertebrae in suspensory mammals. Nat. Ecol. Evol. 3, 949–956 (2019).
Macaca_radiata	Narita, Y. & Kuratani, S. Evolution of the vertebral formulae in mammals: a perspective on developmental constraints. J. Exper. Zool. B: Mol. Dev. Evol. 304, 91–106 (2005).
Macaca_fascicularis	Williams, S. A., Spear, J. K., Petrullo, L., Goldstein, D. M., Lee, A. B., Peterson, A. L., Miano, D. A., Kaczmarek, E. B. & Shattuck, M. R. Increased variation in numbers of presacral vertebrae in suspensory mammals. Nat. Ecol. Evol. 3, 949–956 (2019).
Macaca_arctoides	Williams, S. A., Spear, J. K., Petrullo, L., Goldstein, D. M., Lee, A. B., Peterson, A. L., Miano, D. A., Kaczmarek, E. B. & Shattuck, M. R. Increased variation in numbers of presacral vertebrae in suspensory mammals. Nat. Ecol. Evol. 3, 949–956 (2019).
Macaca_nigra	Williams, S. A., Spear, J. K., Petrullo, L., Goldstein, D. M., Lee, A. B., Peterson, A. L., Miano, D. A., Kaczmarek, E. B. & Shattuck, M. R. Increased variation in numbers of presacral vertebrae in suspensory mammals. Nat. Ecol. Evol. 3, 949–956 (2019).
Macaca_fuscata	Williams, S. A., Spear, J. K., Petrullo, L., Goldstein, D. M., Lee, A. B., Peterson, A. L., Miano, D. A., Kaczmarek, E. B. & Shattuck, M. R. Increased variation in numbers of presacral vertebrae in suspensory mammals. Nat. Ecol. Evol. 3, 949–956 (2019).
Macaca_mulatta	Williams, S. A., Spear, J. K., Petrullo, L., Goldstein, D. M., Lee, A. B., Peterson, A. L., Miano, D. A., Kaczmarek, E. B. & Shattuck, M. R. Increased variation in numbers of presacral vertebrae in suspensory mammals. Nat. Ecol. Evol. 3, 949–956 (2019).
Macaca_sylvanus	Williams, S. A., Spear, J. K., Petrullo, L., Goldstein, D. M., Lee, A. B., Peterson, A. L., Miano, D. A., Kaczmarek, E. B. & Shattuck, M. R. Increased variation in numbers of presacral vertebrae in suspensory mammals. Nat. Ecol. Evol. 3, 949–956 (2019).
Theropithecus_gelada	Williams, S. A., Spear, J. K., Petrullo, L., Goldstein, D. M., Lee, A. B., Peterson, A. L., Miano, D. A., Kaczmarek, E. B. & Shattuck, M. R. Increased variation in numbers of presacral vertebrae in suspensory mammals. Nat. Ecol. Evol. 3, 949–956 (2019).
Papio_cynocephalus	Williams, S. A., Spear, J. K., Petrullo, L., Goldstein, D. M., Lee, A. B., Peterson, A. L., Miano, D. A., Kaczmarek, E. B. & Shattuck, M. R. Increased variation in numbers of presacral vertebrae in suspensory mammals. Nat. Ecol. Evol. 3, 949–956 (2019).
Papio_papio	Williams, S. A., Spear, J. K., Petrullo, L., Goldstein, D. M., Lee, A. B., Peterson, A. L., Miano, D. A., Kaczmarek, E. B. & Shattuck, M. R. Increased variation in numbers of presacral vertebrae in suspensory mammals. Nat. Ecol. Evol. 3, 949–956 (2019).
Papio_hamadryas	Williams, S. A., Spear, J. K., Petrullo, L., Goldstein, D. M., Lee, A. B., Peterson, A. L., Miano, D. A., Kaczmarek, E. B. & Shattuck, M. R. Increased variation in numbers of presacral vertebrae in suspensory mammals. Nat. Ecol. Evol. 3, 949–956 (2019).
Papio_anubis	Williams, S. A., Spear, J. K., Petrullo, L., Goldstein, D. M., Lee, A. B., Peterson, A. L., Miano, D. A., Kaczmarek, E. B. & Shattuck, M. R. Increased variation in numbers of presacral vertebrae in suspensory mammals. Nat. Ecol. Evol. 3, 949–956 (2019).
Lophocebus_aterrimus	Schultz, A. H & Straus, W. L. Jr. The numbers of vertebrae in primates. Proc. Amer. Phil. Soc. 89, 601–626 (1945).
Lophocebus_albigena	Schultz, A. H & Straus, W. L. Jr. The numbers of vertebrae in primates. Proc. Amer. Phil. Soc. 89, 601–626 (1945).
Cercocebus_atys	Pilbeam, D. The anthropoid postcranial axial skeleton: comments on development, variation, and evolution. J. Exper. Zool. B: Mol. Dev. Evol. 302, 241-267 (2004).
Mandrillus_sphinx	Williams, S. A., Spear, J. K., Petrullo, L., Goldstein, D. M., Lee, A. B., Peterson, A. L., Miano, D. A., Kaczmarek, E. B. & Shattuck, M. R. Increased variation in numbers of presacral vertebrae in suspensory mammals. Nat. Ecol. Evol. 3, 949–956 (2019).
Mandrillus_leucophaeus	Williams, S. A., Spear, J. K., Petrullo, L., Goldstein, D. M., Lee, A. B., Peterson, A. L., Miano, D. A., Kaczmarek, E. B. & Shattuck, M. R. Increased variation in numbers of presacral vertebrae in suspensory mammals. Nat. Ecol. Evol. 3, 949–956 (2019).
Cercopithecus_mitis	Schultz, A. H & Straus, W. L. Jr. The numbers of vertebrae in primates. Proc. Amer. Phil. Soc. 89, 601–626 (1945).
Cercopithecus_ascanius	Williams, S. A., Spear, J. K., Petrullo, L., Goldstein, D. M., Lee, A. B., Peterson, A. L., Miano, D. A., Kaczmarek, E. B. & Shattuck, M. R. Increased variation in numbers of presacral vertebrae in suspensory mammals. Nat. Ecol. Evol. 3, 949–956 (2019).
Erythrocebus_patas	Schultz, A. H & Straus, W. L. Jr. The numbers of vertebrae in primates. Proc. Amer. Phil. Soc. 89, 601–626 (1945).
Chlorocebus_pygerythrus	Williams, S. A., Spear, J. K., Petrullo, L., Goldstein, D. M., Lee, A. B., Peterson, A. L., Miano, D. A., Kaczmarek, E. B. & Shattuck, M. R. Increased variation in numbers of presacral vertebrae in suspensory mammals. Nat. Ecol. Evol. 3, 949–956 (2019).
Chlorocebus_aethiops	Williams, S. A., Spear, J. K., Petrullo, L., Goldstein, D. M., Lee, A. B., Peterson, A. L., Miano, D. A., Kaczmarek, E. B. & Shattuck, M. R. Increased variation in numbers of presacral vertebrae in suspensory mammals. Nat. Ecol. Evol. 3, 949–956 (2019).
Chlorocebus_cynosuros	Williams, S. A., Spear, J. K., Petrullo, L., Goldstein, D. M., Lee, A. B., Peterson, A. L., Miano, D. A., Kaczmarek, E. B. & Shattuck, M. R. Increased variation in numbers of presacral vertebrae in suspensory mammals. Nat. Ecol. Evol. 3, 949–956 (2019).
Chlorocebus_sabaeus	Williams, S. A., Spear, J. K., Petrullo, L., Goldstein, D. M., Lee, A. B., Peterson, A. L., Miano, D. A., Kaczmarek, E. B. & Shattuck, M. R. Increased variation in numbers of presacral vertebrae in suspensory mammals. Nat. Ecol. Evol. 3, 949–956 (2019).
Miopithecus_talapoin	Williams, S. A., Spear, J. K., Petrullo, L., Goldstein, D. M., Lee, A. B., Peterson, A. L., Miano, D. A., Kaczmarek, E. B. & Shattuck, M. R. Increased variation in numbers of presacral vertebrae in suspensory mammals. Nat. Ecol. Evol. 3, 949–956 (2019).
Ptilocercus_lowii	Sánchez‐Villagra, M. R., Narita, Y. & Kuratani, S. Thoracolumbar vertebral number: the first skeletal synapomorphy for afrotherian mammals. Syst. Biodiv. 5, 1–7 (2007).
Tupaia_glis	Kawashima, T., Thorington Jr, R. W., Bohaska, P. W. & Sato, F. Variability and constraint of vertebral formulae and proportions in colugos, tree shrews, and rodents, with special reference to vertebral modification by aerodynamic adaptation. Folia Morphol. 77, 44-56 (2018).
Tupaia_nicobarica	Kawashima, T., Thorington Jr, R. W., Bohaska, P. W. & Sato, F. Variability and constraint of vertebral formulae and proportions in colugos, tree shrews, and rodents, with special reference to vertebral modification by aerodynamic adaptation. Folia Morphol. 77, 44-56 (2018).
Urogale_everetti	Kawashima, T., Thorington Jr, R. W., Bohaska, P. W. & Sato, F. Variability and constraint of vertebral formulae and proportions in colugos, tree shrews, and rodents, with special reference to vertebral modification by aerodynamic adaptation. Folia Morphol. 77, 44-56 (2018).
Tupaia_tana	Kawashima, T., Thorington Jr, R. W., Bohaska, P. W. & Sato, F. Variability and constraint of vertebral formulae and proportions in colugos, tree shrews, and rodents, with special reference to vertebral modification by aerodynamic adaptation. Folia Morphol. 77, 44-56 (2018).
Dendrogale_melanura	Kawashima, T., Thorington Jr, R. W., Bohaska, P. W. & Sato, F. Variability and constraint of vertebral formulae and proportions in colugos, tree shrews, and rodents, with special reference to vertebral modification by aerodynamic adaptation. Folia Morphol. 77, 44-56 (2018).
Anathana_ellioti	Sargis, E. J. A preliminary qualitative analysis of the axial skeleton of tupaiids (Mammalia, Scandentia): functional morphology and phylogenetic implications. J. Zool. 253, 473-483 (2001).
Sylvilagus_audubonii	Chapman, J. A. & Willner, G. R. Sylvilagus audubonii. Mamm. Spec. 106, 1-4 (1978).
Oryctolagus_cuniculus	Narita, Y. & Kuratani, S. Evolution of the vertebral formulae in mammals: a perspective on developmental constraints. J. Exper. Zool. B: Mol. Dev. Evol. 304, 91–106 (2005).
Pentalagus_furnessi	Yamada, F. & Cervantes, F. A. Pentalagus furnessi. Mamm. Spec. 782, 1-5 (2005).
Lepus_californicus	Williams, S. A., Spear, J. K., Petrullo, L., Goldstein, D. M., Lee, A. B., Peterson, A. L., Miano, D. A., Kaczmarek, E. B. & Shattuck, M. R. Increased variation in numbers of presacral vertebrae in suspensory mammals. Nat. Ecol. Evol. 3, 949–956 (2019).
Lepus_alleni	Williams, S. A., Spear, J. K., Petrullo, L., Goldstein, D. M., Lee, A. B., Peterson, A. L., Miano, D. A., Kaczmarek, E. B. & Shattuck, M. R. Increased variation in numbers of presacral vertebrae in suspensory mammals. Nat. Ecol. Evol. 3, 949–956 (2019).
Lepus_townsendii	Williams, S. A., Spear, J. K., Petrullo, L., Goldstein, D. M., Lee, A. B., Peterson, A. L., Miano, D. A., Kaczmarek, E. B. & Shattuck, M. R. Increased variation in numbers of presacral vertebrae in suspensory mammals. Nat. Ecol. Evol. 3, 949–956 (2019).
Lepus_timidus	Narita, Y. & Kuratani, S. Evolution of the vertebral formulae in mammals: a perspective on developmental constraints. J. Exper. Zool. B: Mol. Dev. Evol. 304, 91–106 (2005).
Lepus_europaeus	Williams, S. A., Spear, J. K., Petrullo, L., Goldstein, D. M., Lee, A. B., Peterson, A. L., Miano, D. A., Kaczmarek, E. B. & Shattuck, M. R. Increased variation in numbers of presacral vertebrae in suspensory mammals. Nat. Ecol. Evol. 3, 949–956 (2019).
Lepus_americanus	Williams, S. A., Spear, J. K., Petrullo, L., Goldstein, D. M., Lee, A. B., Peterson, A. L., Miano, D. A., Kaczmarek, E. B. & Shattuck, M. R. Increased variation in numbers of presacral vertebrae in suspensory mammals. Nat. Ecol. Evol. 3, 949–956 (2019).
Nesolagus_timminsi	Averʹi︠a︡nov, A. O., Abramov, A. V. & Tikhonov, A. N. A new species of Nesolagus (Lagomorpha, Leporidae) from Vietnam with osteological description. (Zoological Institute St. Petersburg, 2000).
Nesolagus_netscheri	Averʹi︠a︡nov, A. O., Abramov, A. V. & Tikhonov, A. N. A new species of Nesolagus (Lagomorpha, Leporidae) from Vietnam with osteological description. (Zoological Institute St. Petersburg, 2000).
Ochotona_hyperborea	Asher, R. J., Bennett, N. & Lehmann, T. The new framework for understanding placental mammal evolution. Bioessays 31, 853–864 (2009).
Ochotona_princeps	Smith, A. T. & Weston, M. L. Ochotona princeps. Mamm. Spec. 352, 1-8 (1990).
Muscardinus_avellanarius	Owen, R. Descriptive catalogue of the osteological series contained in the museum of the Royal College of Surgeons of England. Vol. 2 (Taylor and Francis, 1853).
Aplodontia_rufa	Williams, S. A., Spear, J. K., Petrullo, L., Goldstein, D. M., Lee, A. B., Peterson, A. L., Miano, D. A., Kaczmarek, E. B. & Shattuck, M. R. Increased variation in numbers of presacral vertebrae in suspensory mammals. Nat. Ecol. Evol. 3, 949–956 (2019).
Ratufa_indica	Owen, R. Descriptive catalogue of the osteological series contained in the museum of the Royal College of Surgeons of England. Vol. 2 (Taylor and Francis, 1853).
Callosciurus_erythraeus	Kawashima, T., Thorington Jr, R. W., Bohaska, P. W. & Sato, F. Variability and constraint of vertebral formulae and proportions in colugos, tree shrews, and rodents, with special reference to vertebral modification by aerodynamic adaptation. Folia Morphol. 77, 44-56 (2018).
Tamias_striatus	Williams, S. A., Spear, J. K., Petrullo, L., Goldstein, D. M., Lee, A. B., Peterson, A. L., Miano, D. A., Kaczmarek, E. B. & Shattuck, M. R. Increased variation in numbers of presacral vertebrae in suspensory mammals. Nat. Ecol. Evol. 3, 949–956 (2019).
Tamias_minimus	Williams, S. A., Spear, J. K., Petrullo, L., Goldstein, D. M., Lee, A. B., Peterson, A. L., Miano, D. A., Kaczmarek, E. B. & Shattuck, M. R. Increased variation in numbers of presacral vertebrae in suspensory mammals. Nat. Ecol. Evol. 3, 949–956 (2019).
Spermophilus_dauricus	Owen, R. Descriptive catalogue of the osteological series contained in the museum of the Royal College of Surgeons of England. Vol. 2 (Taylor and Francis, 1853).
Ictidomys_tridecemlineatus	Streubel, D. P. & Fitzgerald, J. P. Spermophilus tridecemlineatus. Mamm. Spec. 103, 1-5 (1978).
Cynomys_ludovicianus	Kawashima, T., Thorington Jr, R. W., Bohaska, P. W. & Sato, F. Variability and constraint of vertebral formulae and proportions in colugos, tree shrews, and rodents, with special reference to vertebral modification by aerodynamic adaptation. Folia Morphol. 77, 44-56 (2018).
Marmota_monax	Williams, S. A., Spear, J. K., Petrullo, L., Goldstein, D. M., Lee, A. B., Peterson, A. L., Miano, D. A., Kaczmarek, E. B. & Shattuck, M. R. Increased variation in numbers of presacral vertebrae in suspensory mammals. Nat. Ecol. Evol. 3, 949–956 (2019).
Marmota_caligata	Williams, S. A., Spear, J. K., Petrullo, L., Goldstein, D. M., Lee, A. B., Peterson, A. L., Miano, D. A., Kaczmarek, E. B. & Shattuck, M. R. Increased variation in numbers of presacral vertebrae in suspensory mammals. Nat. Ecol. Evol. 3, 949–956 (2019).
Marmota_marmota	Williams, S. A., Spear, J. K., Petrullo, L., Goldstein, D. M., Lee, A. B., Peterson, A. L., Miano, D. A., Kaczmarek, E. B. & Shattuck, M. R. Increased variation in numbers of presacral vertebrae in suspensory mammals. Nat. Ecol. Evol. 3, 949–956 (2019).
Marmota_sibirica	Narita, Y. & Kuratani, S. Evolution of the vertebral formulae in mammals: a perspective on developmental constraints. J. Exper. Zool. B: Mol. Dev. Evol. 304, 91–106 (2005).
Sciurus_anomalus	Koprowski, J. L., Gavish, L. & Doumas, S. L. Sciurus anomalus (Rodentia: Sciuridae). Mamm. Spec. 934, 48-58 (2016).
Sciurus_niger	Williams, S. A., Spear, J. K., Petrullo, L., Goldstein, D. M., Lee, A. B., Peterson, A. L., Miano, D. A., Kaczmarek, E. B. & Shattuck, M. R. Increased variation in numbers of presacral vertebrae in suspensory mammals. Nat. Ecol. Evol. 3, 949–956 (2019).
Sciurus_carolinensis	Williams, S. A., Spear, J. K., Petrullo, L., Goldstein, D. M., Lee, A. B., Peterson, A. L., Miano, D. A., Kaczmarek, E. B. & Shattuck, M. R. Increased variation in numbers of presacral vertebrae in suspensory mammals. Nat. Ecol. Evol. 3, 949–956 (2019).
Sciurus_griseus	Carraway, L. N. & Verts, B. J. (1994). Sciurus griseus. Mamm. Spec. 474, 1-7 (1994).
Microsciurus_mimulus	Williams, S. A., Spear, J. K., Petrullo, L., Goldstein, D. M., Lee, A. B., Peterson, A. L., Miano, D. A., Kaczmarek, E. B. & Shattuck, M. R. Increased variation in numbers of presacral vertebrae in suspensory mammals. Nat. Ecol. Evol. 3, 949–956 (2019).
Microsciurus_alfari	Williams, S. A., Spear, J. K., Petrullo, L., Goldstein, D. M., Lee, A. B., Peterson, A. L., Miano, D. A., Kaczmarek, E. B. & Shattuck, M. R. Increased variation in numbers of presacral vertebrae in suspensory mammals. Nat. Ecol. Evol. 3, 949–956 (2019).
Microsciurus_flaviventer	Williams, S. A., Spear, J. K., Petrullo, L., Goldstein, D. M., Lee, A. B., Peterson, A. L., Miano, D. A., Kaczmarek, E. B. & Shattuck, M. R. Increased variation in numbers of presacral vertebrae in suspensory mammals. Nat. Ecol. Evol. 3, 949–956 (2019).
Sciurus_vulgaris	Asher, R. J., Lin, K. H., Kardjilov, N. & Hautier, L. Variability and constraint in the mammalian vertebral column. J. Evol. Biol. 24, 1080-1090 (2011).
Tamiasciurus_hudsonicus	Williams, S. A., Spear, J. K., Petrullo, L., Goldstein, D. M., Lee, A. B., Peterson, A. L., Miano, D. A., Kaczmarek, E. B. & Shattuck, M. R. Increased variation in numbers of presacral vertebrae in suspensory mammals. Nat. Ecol. Evol. 3, 949–956 (2019).
Glaucomys_volans	Kawashima, T., Thorington Jr, R. W., Bohaska, P. W. & Sato, F. Variability and constraint of vertebral formulae and proportions in colugos, tree shrews, and rodents, with special reference to vertebral modification by aerodynamic adaptation. Folia Morphol. 77, 44-56 (2018).
Petaurista_leucogenys	Kawashima, T., Thorington Jr, R. W., Bohaska, P. W. & Sato, F. Variability and constraint of vertebral formulae and proportions in colugos, tree shrews, and rodents, with special reference to vertebral modification by aerodynamic adaptation. Folia Morphol. 77, 44-56 (2018).
Petaurista_philippensis	Thippan, M., Lakshmishree, K., Dhoolappa, M., Manjunath, S., Jayaramu, G.,& Vinay, S. Gross Morphology and Morphometrical Studies on the Vertebral Column of Indian Giant Flying Squirrel (Petaurista philippensis). Int. J. Livestock Res. 9, 138-153 (2019).
Petaurista_alborufus	Kawashima, T., Thorington Jr, R. W., Bohaska, P. W. & Sato, F. Variability and constraint of vertebral formulae and proportions in colugos, tree shrews, and rodents, with special reference to vertebral modification by aerodynamic adaptation. Folia Morphol. 77, 44-56 (2018).
Petaurista_grandis	Kawashima, T., Thorington Jr, R. W., Bohaska, P. W. & Sato, F. Variability and constraint of vertebral formulae and proportions in colugos, tree shrews, and rodents, with special reference to vertebral modification by aerodynamic adaptation. Folia Morphol. 77, 44-56 (2018).
Laonastes_aenigmamus	Jenkins, P. D., Kilpatrick, C. W., Robinson, M. F. & Timmins, R. J. Morphological and molecular investigations of a new family, genus and species of rodent (Mammalia: Rodentia: Hystricognatha) from Lao PDR. Syst. Biodiv. 2, 419-454 (2005).
Atherurus_macrourus	Kawashima, T., Thorington Jr, R. W., Bohaska, P. W. & Sato, F. Variability and constraint of vertebral formulae and proportions in colugos, tree shrews, and rodents, with special reference to vertebral modification by aerodynamic adaptation. Folia Morphol. 77, 44-56 (2018).
Hystrix_javanica	Owen, R. Descriptive catalogue of the osteological series contained in the museum of the Royal College of Surgeons of England. Vol. 2 (Taylor and Francis, 1853).
Hystrix_cristata	Narita, Y. & Kuratani, S. Evolution of the vertebral formulae in mammals: a perspective on developmental constraints. J. Exper. Zool. B: Mol. Dev. Evol. 304, 91–106 (2005).
Thryonomys_swinderianus	Mustapha, O. A., Aderounmu, O. A., Olude, M. A., Okandeji, M. E., Akinloye, A. K., Oke, B. O. & Olopade, J. O. Anatomical studies on the spinal cord of the greater cane rat (Thryonomys swinderianus, Temminck) I: gross morphometry. Niger. Vet. J. 36, 1192-1202. (2015).
Heterocephalus_glaber	Williams, S. A., Spear, J. K., Petrullo, L., Goldstein, D. M., Lee, A. B., Peterson, A. L., Miano, D. A., Kaczmarek, E. B. & Shattuck, M. R. Increased variation in numbers of presacral vertebrae in suspensory mammals. Nat. Ecol. Evol. 3, 949–956 (2019).
Heliophobius_argenteocinereus	Williams, S. A., Spear, J. K., Petrullo, L., Goldstein, D. M., Lee, A. B., Peterson, A. L., Miano, D. A., Kaczmarek, E. B. & Shattuck, M. R. Increased variation in numbers of presacral vertebrae in suspensory mammals. Nat. Ecol. Evol. 3, 949–956 (2019).
Cryptomys_hottentotus	Williams, S. A., Spear, J. K., Petrullo, L., Goldstein, D. M., Lee, A. B., Peterson, A. L., Miano, D. A., Kaczmarek, E. B. & Shattuck, M. R. Increased variation in numbers of presacral vertebrae in suspensory mammals. Nat. Ecol. Evol. 3, 949–956 (2019).
Georychus_capensis	Owen, R. Descriptive catalogue of the osteological series contained in the museum of the Royal College of Surgeons of England. Vol. 2 (Taylor and Francis, 1853).
Bathyergus_suillus	Narita, Y. & Kuratani, S. Evolution of the vertebral formulae in mammals: a perspective on developmental constraints. J. Exper. Zool. B: Mol. Dev. Evol. 304, 91–106 (2005).
Cuniculus_paca	Narita, Y. & Kuratani, S. Evolution of the vertebral formulae in mammals: a perspective on developmental constraints. J. Exper. Zool. B: Mol. Dev. Evol. 304, 91–106 (2005).
Myoprocta_acouchy	Narita, Y. & Kuratani, S. Evolution of the vertebral formulae in mammals: a perspective on developmental constraints. J. Exper. Zool. B: Mol. Dev. Evol. 304, 91–106 (2005).
Dasyprocta_leporina	Sundaram, V., Jones, K., Mootoo, N. & Tomar, M. P. S. (2021). Anatomy of the vertebral column, ribs and sternum in orange rumped agouti (Dasyprocta leporina Linnaeus, 1758): Structural and Functional perspectives. Anat. Histol. Embryol. 50, 985-995 (2021).
Dasyprocta_azarae	Oliveira, F. S., Martins, L. L., Pauloni, A. P., Machado, M. R. F., Toniollo, G. H. & Canola, J. C. Descrição anátomo-radiográfica do esqueleto axial da cutia (Dasyprocta azarae Lichtenstein, 1823). Ars Vet. 25, 20-23 (2009).
Hydrochoerus_hydrochaeris	Williams, S. A., Spear, J. K., Petrullo, L., Goldstein, D. M., Lee, A. B., Peterson, A. L., Miano, D. A., Kaczmarek, E. B. & Shattuck, M. R. Increased variation in numbers of presacral vertebrae in suspensory mammals. Nat. Ecol. Evol. 3, 949–956 (2019).
Dolichotis_patagonum	Williams, S. A., Spear, J. K., Petrullo, L., Goldstein, D. M., Lee, A. B., Peterson, A. L., Miano, D. A., Kaczmarek, E. B. & Shattuck, M. R. Increased variation in numbers of presacral vertebrae in suspensory mammals. Nat. Ecol. Evol. 3, 949–956 (2019).
Cavia_porcellus	Kawashima, T., Thorington Jr, R. W., Bohaska, P. W. & Sato, F. Variability and constraint of vertebral formulae and proportions in colugos, tree shrews, and rodents, with special reference to vertebral modification by aerodynamic adaptation. Folia Morphol. 77, 44-56 (2018).
Cavia_aperea	Narita, Y. & Kuratani, S. Evolution of the vertebral formulae in mammals: a perspective on developmental constraints. J. Exper. Zool. B: Mol. Dev. Evol. 304, 91–106 (2005).
Erethizon_dorsatum	Williams, S. A., Spear, J. K., Petrullo, L., Goldstein, D. M., Lee, A. B., Peterson, A. L., Miano, D. A., Kaczmarek, E. B. & Shattuck, M. R. Increased variation in numbers of presacral vertebrae in suspensory mammals. Nat. Ecol. Evol. 3, 949–956 (2019).
Coendou_prehensilis	Williams, S. A., Spear, J. K., Petrullo, L., Goldstein, D. M., Lee, A. B., Peterson, A. L., Miano, D. A., Kaczmarek, E. B. & Shattuck, M. R. Increased variation in numbers of presacral vertebrae in suspensory mammals. Nat. Ecol. Evol. 3, 949–956 (2019).
Lagostomus_maximus	Owen, R. Descriptive catalogue of the osteological series contained in the museum of the Royal College of Surgeons of England. Vol. 2 (Taylor and Francis, 1853).
Chinchilla_lanigera	Spotorno, A. E., Zuleta, C. A., Valladares, J. P., Deane, A. L. & Jiménez, J. E. Chinchilla laniger. Mamm. Spec. 758, 1-9. (2004).
Chinchilla_chinchilla	Spotorno, A. E., Zuleta, C. A., Valladares, J. P., Deane, A. L. & Jiménez, J. E. Chinchilla laniger. Mamm. Spec. 758, 1-9. (2004).
Phyllomys_sulinus	Leite, Y. L., Christoff, A. U. & Fagundes, V. A new species of Atlantic Forest tree rat, genus Phyllomys (Rodentia, Echimyidae) from southern Brazil. J. Mammal. 89, 845-851 (2008).
Myocastor_coypus	Narita, Y. & Kuratani, S. Evolution of the vertebral formulae in mammals: a perspective on developmental constraints. J. Exper. Zool. B: Mol. Dev. Evol. 304, 91–106 (2005).
Capromys_pilorides	Spotorno, A. E., Zuleta, C. A., Valladares, J. P., Deane, A. L. & Jiménez, J. E. Chinchilla laniger. Mamm. Spec. 758, 1-9. (2004).
Ctenomys_boliviensis	Williams, S. A., Spear, J. K., Petrullo, L., Goldstein, D. M., Lee, A. B., Peterson, A. L., Miano, D. A., Kaczmarek, E. B. & Shattuck, M. R. Increased variation in numbers of presacral vertebrae in suspensory mammals. Nat. Ecol. Evol. 3, 949–956 (2019).
Ctenomys_talarum	Asher, R. J., Lin, K. H., Kardjilov, N. & Hautier, L. Variability and constraint in the mammalian vertebral column. J. Evol. Biol. 24, 1080-1090 (2011).
Octodon_degus	Williams, S. A., Spear, J. K., Petrullo, L., Goldstein, D. M., Lee, A. B., Peterson, A. L., Miano, D. A., Kaczmarek, E. B. & Shattuck, M. R. Increased variation in numbers of presacral vertebrae in suspensory mammals. Nat. Ecol. Evol. 3, 949–956 (2019).
Spalacopus_cyanus	Pérez, M. J. & Díaz, M. M. Esqueleto poscraneal de Spalacopus cyanus (Rodentia: Octodontidae): descripción y aspectos funcionales. Therya 11, 407-422 (2020).
Dipus_sagitta	Owen, R. Descriptive catalogue of the osteological series contained in the museum of the Royal College of Surgeons of England. Vol. 2 (Taylor and Francis, 1853).
Jaculus_orientalis	Williams, S. A., Spear, J. K., Petrullo, L., Goldstein, D. M., Lee, A. B., Peterson, A. L., Miano, D. A., Kaczmarek, E. B. & Shattuck, M. R. Increased variation in numbers of presacral vertebrae in suspensory mammals. Nat. Ecol. Evol. 3, 949–956 (2019).
Jaculus_jaculus	Williams, S. A., Spear, J. K., Petrullo, L., Goldstein, D. M., Lee, A. B., Peterson, A. L., Miano, D. A., Kaczmarek, E. B. & Shattuck, M. R. Increased variation in numbers of presacral vertebrae in suspensory mammals. Nat. Ecol. Evol. 3, 949–956 (2019).
Stylodipus_telum	Williams, S. A., Spear, J. K., Petrullo, L., Goldstein, D. M., Lee, A. B., Peterson, A. L., Miano, D. A., Kaczmarek, E. B. & Shattuck, M. R. Increased variation in numbers of presacral vertebrae in suspensory mammals. Nat. Ecol. Evol. 3, 949–956 (2019).
Allactaga_euphratica	Hatt, R. T. The vertebral columns of ricochetal rodents. Bull. Amer. Mus. Nat. Hist. 63, 599-708.
Allactaga_major	Hatt, R. T. The vertebral columns of ricochetal rodents. Bull. Amer. Mus. Nat. Hist. 63, 599-708.
Zapus_princeps	Hart, E. B., Belk, M. C., Jordan, E. & Gonzalez, M. W. Zapus princeps. Mamm. Spec. 749, 1-7 (2004).
Sicista_concolor	Hatt, R. T. The vertebral columns of ricochetal rodents. Bull. Amer. Mus. Nat. Hist. 63, 599-708.
Spalax_leucodon	Özkan, Z. E. Macro-anatomical investigations on the skeletons of mole-rat (Spalax leucodon Nordmann) III. Skeleton axiale. Veterinarski Arhiv 77, 281-289 (2007).
Rhizomys_pruinosus	Spotorno, A. E., Zuleta, C. A., Valladares, J. P., Deane, A. L. & Jiménez, J. E. Chinchilla laniger. Mamm. Spec. 758, 1-9. (2004).
Dicrostonyx_groenlandicus	Carleton, M. D. Phylogenetic relationships in neotomine-peromyscine rodents (Muroidea) and a reappraisal of the dichotomy within New World Cricetinae. Misc. Publ. Mus. Zool. Univ. Mich. 157, 1-146 (1980).
Ondatra_zibethicus	Carleton, M. D. Phylogenetic relationships in neotomine-peromyscine rodents (Muroidea) and a reappraisal of the dichotomy within New World Cricetinae. Misc. Publ. Mus. Zool. Univ. Mich. 157, 1-146 (1980).
Lemmus_sibiricus	Carleton, M. D. Phylogenetic relationships in neotomine-peromyscine rodents (Muroidea) and a reappraisal of the dichotomy within New World Cricetinae. Misc. Publ. Mus. Zool. Univ. Mich. 157, 1-146 (1980).
Synaptomys_cooperi	Carleton, M. D. Phylogenetic relationships in neotomine-peromyscine rodents (Muroidea) and a reappraisal of the dichotomy within New World Cricetinae. Misc. Publ. Mus. Zool. Univ. Mich. 157, 1-146 (1980).
Ellobius_talpinus	Williams, S. A., Spear, J. K., Petrullo, L., Goldstein, D. M., Lee, A. B., Peterson, A. L., Miano, D. A., Kaczmarek, E. B. & Shattuck, M. R. Increased variation in numbers of presacral vertebrae in suspensory mammals. Nat. Ecol. Evol. 3, 949–956 (2019).
Microtus_arvalis	Owen, R. Descriptive catalogue of the osteological series contained in the museum of the Royal College of Surgeons of England. Vol. 2 (Taylor and Francis, 1853).
Microtus_pennsylvanicus	Williams, S. A., Spear, J. K., Petrullo, L., Goldstein, D. M., Lee, A. B., Peterson, A. L., Miano, D. A., Kaczmarek, E. B. & Shattuck, M. R. Increased variation in numbers of presacral vertebrae in suspensory mammals. Nat. Ecol. Evol. 3, 949–956 (2019).
Microtus_ochrogaster	Williams, S. A., Spear, J. K., Petrullo, L., Goldstein, D. M., Lee, A. B., Peterson, A. L., Miano, D. A., Kaczmarek, E. B. & Shattuck, M. R. Increased variation in numbers of presacral vertebrae in suspensory mammals. Nat. Ecol. Evol. 3, 949–956 (2019).
Microtus_chrotorrhinus	Williams, S. A., Spear, J. K., Petrullo, L., Goldstein, D. M., Lee, A. B., Peterson, A. L., Miano, D. A., Kaczmarek, E. B. & Shattuck, M. R. Increased variation in numbers of presacral vertebrae in suspensory mammals. Nat. Ecol. Evol. 3, 949–956 (2019).
Microtus_oeconomus	Asher, R. J., Lin, K. H., Kardjilov, N. & Hautier, L. Variability and constraint in the mammalian vertebral column. J. Evol. Biol. 24, 1080-1090 (2011).
Myodes_gapperi	Carleton, M. D. Phylogenetic relationships in neotomine-peromyscine rodents (Muroidea) and a reappraisal of the dichotomy within New World Cricetinae. Misc. Publ. Mus. Zool. Univ. Mich. 157, 1-146 (1980).
Mesocricetus_auratus	Steppan, S. Revision of the tribe Phyllotini (Rodentia: Sigmondontinae), with a phylogenetic hypothesis for the Sigmodontinae. Revisión de la tribu Phyllotini (Rodentia: Sigmondontinae), con una hipótesis filogenética para los Sigmodontinae. Fieldiana Zool. 1464, 1-112 (1995).
Tscherskia_triton	Steppan, S. Revision of the tribe Phyllotini (Rodentia: Sigmondontinae), with a phylogenetic hypothesis for the Sigmodontinae. Revisión de la tribu Phyllotini (Rodentia: Sigmondontinae), con una hipótesis filogenética para los Sigmodontinae. Fieldiana Zool. 1464, 1-112 (1995).
Cricetus_cricetus	Steppan, S. Revision of the tribe Phyllotini (Rodentia: Sigmondontinae), with a phylogenetic hypothesis for the Sigmodontinae. Revisión de la tribu Phyllotini (Rodentia: Sigmondontinae), con una hipótesis filogenética para los Sigmodontinae. Fieldiana Zool. 1464, 1-112 (1995).
Cricetulus_migratorius	Carleton, M. D. Phylogenetic relationships in neotomine-peromyscine rodents (Muroidea) and a reappraisal of the dichotomy within New World Cricetinae. Misc. Publ. Mus. Zool. Univ. Mich. 157, 1-146 (1980).
Cricetulus_longicaudatus	Steppan, S. Revision of the tribe Phyllotini (Rodentia: Sigmondontinae), with a phylogenetic hypothesis for the Sigmodontinae. Revisión de la tribu Phyllotini (Rodentia: Sigmondontinae), con una hipótesis filogenética para los Sigmodontinae. Fieldiana Zool. 1464, 1-112 (1995).
Cricetulus_barabensis	Steppan, S. Revision of the tribe Phyllotini (Rodentia: Sigmondontinae), with a phylogenetic hypothesis for the Sigmodontinae. Revisión de la tribu Phyllotini (Rodentia: Sigmondontinae), con una hipótesis filogenética para los Sigmodontinae. Fieldiana Zool. 1464, 1-112 (1995).
Phodopus_sungorus	Steppan, S. Revision of the tribe Phyllotini (Rodentia: Sigmondontinae), with a phylogenetic hypothesis for the Sigmodontinae. Revisión de la tribu Phyllotini (Rodentia: Sigmondontinae), con una hipótesis filogenética para los Sigmodontinae. Fieldiana Zool. 1464, 1-112 (1995).
Neotoma_fuscipes	Carleton, M. D. Phylogenetic relationships in neotomine-peromyscine rodents (Muroidea) and a reappraisal of the dichotomy within New World Cricetinae. Misc. Publ. Mus. Zool. Univ. Mich. 157, 1-146 (1980).
Neotoma_lepida	Carleton, M. D. Phylogenetic relationships in neotomine-peromyscine rodents (Muroidea) and a reappraisal of the dichotomy within New World Cricetinae. Misc. Publ. Mus. Zool. Univ. Mich. 157, 1-146 (1980).
Neotoma_floridana	Carleton, M. D. Phylogenetic relationships in neotomine-peromyscine rodents (Muroidea) and a reappraisal of the dichotomy within New World Cricetinae. Misc. Publ. Mus. Zool. Univ. Mich. 157, 1-146 (1980).
Neotoma_albigula	Carleton, M. D. Phylogenetic relationships in neotomine-peromyscine rodents (Muroidea) and a reappraisal of the dichotomy within New World Cricetinae. Misc. Publ. Mus. Zool. Univ. Mich. 157, 1-146 (1980).
Neotoma_mexicana	Carleton, M. D. Phylogenetic relationships in neotomine-peromyscine rodents (Muroidea) and a reappraisal of the dichotomy within New World Cricetinae. Misc. Publ. Mus. Zool. Univ. Mich. 157, 1-146 (1980).
Neotoma_cinerea	Carleton, M. D. Phylogenetic relationships in neotomine-peromyscine rodents (Muroidea) and a reappraisal of the dichotomy within New World Cricetinae. Misc. Publ. Mus. Zool. Univ. Mich. 157, 1-146 (1980).
Hodomys_alleni	Carleton, M. D. Phylogenetic relationships in neotomine-peromyscine rodents (Muroidea) and a reappraisal of the dichotomy within New World Cricetinae. Misc. Publ. Mus. Zool. Univ. Mich. 157, 1-146 (1980).
Nelsonia_neotomodon	Carleton, M. D. Phylogenetic relationships in neotomine-peromyscine rodents (Muroidea) and a reappraisal of the dichotomy within New World Cricetinae. Misc. Publ. Mus. Zool. Univ. Mich. 157, 1-146 (1980).
Xenomys_nelsoni	Carleton, M. D. Phylogenetic relationships in neotomine-peromyscine rodents (Muroidea) and a reappraisal of the dichotomy within New World Cricetinae. Misc. Publ. Mus. Zool. Univ. Mich. 157, 1-146 (1980).
Ochrotomys_nuttalli	Steppan, S. Revision of the tribe Phyllotini (Rodentia: Sigmondontinae), with a phylogenetic hypothesis for the Sigmodontinae. Revisión de la tribu Phyllotini (Rodentia: Sigmondontinae), con una hipótesis filogenética para los Sigmodontinae. Fieldiana Zool. 1464, 1-112 (1995).
Reithrodontomys_creper	Carleton, M. D. Phylogenetic relationships in neotomine-peromyscine rodents (Muroidea) and a reappraisal of the dichotomy within New World Cricetinae. Misc. Publ. Mus. Zool. Univ. Mich. 157, 1-146 (1980).
Reithrodontomys_mexicanus	Carleton, M. D. Phylogenetic relationships in neotomine-peromyscine rodents (Muroidea) and a reappraisal of the dichotomy within New World Cricetinae. Misc. Publ. Mus. Zool. Univ. Mich. 157, 1-146 (1980).
Reithrodontomys_fulvescens	Carleton, M. D. Phylogenetic relationships in neotomine-peromyscine rodents (Muroidea) and a reappraisal of the dichotomy within New World Cricetinae. Misc. Publ. Mus. Zool. Univ. Mich. 157, 1-146 (1980).
Reithrodontomys_sumichrasti	Carleton, M. D. Phylogenetic relationships in neotomine-peromyscine rodents (Muroidea) and a reappraisal of the dichotomy within New World Cricetinae. Misc. Publ. Mus. Zool. Univ. Mich. 157, 1-146 (1980).
Reithrodontomys_megalotis	Carleton, M. D. Phylogenetic relationships in neotomine-peromyscine rodents (Muroidea) and a reappraisal of the dichotomy within New World Cricetinae. Misc. Publ. Mus. Zool. Univ. Mich. 157, 1-146 (1980).
Reithrodontomys_humulis	Carleton, M. D. Phylogenetic relationships in neotomine-peromyscine rodents (Muroidea) and a reappraisal of the dichotomy within New World Cricetinae. Misc. Publ. Mus. Zool. Univ. Mich. 157, 1-146 (1980).
Reithrodontomys_montanus	Carleton, M. D. Phylogenetic relationships in neotomine-peromyscine rodents (Muroidea) and a reappraisal of the dichotomy within New World Cricetinae. Misc. Publ. Mus. Zool. Univ. Mich. 157, 1-146 (1980).
Isthmomys_pirrensis	Carleton, M. D. Phylogenetic relationships in neotomine-peromyscine rodents (Muroidea) and a reappraisal of the dichotomy within New World Cricetinae. Misc. Publ. Mus. Zool. Univ. Mich. 157, 1-146 (1980).
Isthmomys_flavidus	Carleton, M. D. Phylogenetic relationships in neotomine-peromyscine rodents (Muroidea) and a reappraisal of the dichotomy within New World Cricetinae. Misc. Publ. Mus. Zool. Univ. Mich. 157, 1-146 (1980).
Onychomys_torridus	Carleton, M. D. Phylogenetic relationships in neotomine-peromyscine rodents (Muroidea) and a reappraisal of the dichotomy within New World Cricetinae. Misc. Publ. Mus. Zool. Univ. Mich. 157, 1-146 (1980).
Onychomys_leucogaster	Williams, S. A., Spear, J. K., Petrullo, L., Goldstein, D. M., Lee, A. B., Peterson, A. L., Miano, D. A., Kaczmarek, E. B. & Shattuck, M. R. Increased variation in numbers of presacral vertebrae in suspensory mammals. Nat. Ecol. Evol. 3, 949–956 (2019).
Peromyscus_maniculatus	Carleton, M. D. Phylogenetic relationships in neotomine-peromyscine rodents (Muroidea) and a reappraisal of the dichotomy within New World Cricetinae. Misc. Publ. Mus. Zool. Univ. Mich. 157, 1-146 (1980).
Peromyscus_leucopus	Williams, S. A., Spear, J. K., Petrullo, L., Goldstein, D. M., Lee, A. B., Peterson, A. L., Miano, D. A., Kaczmarek, E. B. & Shattuck, M. R. Increased variation in numbers of presacral vertebrae in suspensory mammals. Nat. Ecol. Evol. 3, 949–956 (2019).
Megadontomys_thomasi	Carleton, M. D. Phylogenetic relationships in neotomine-peromyscine rodents (Muroidea) and a reappraisal of the dichotomy within New World Cricetinae. Misc. Publ. Mus. Zool. Univ. Mich. 157, 1-146 (1980).
Peromyscus_yucatanicus	Carleton, M. D. Phylogenetic relationships in neotomine-peromyscine rodents (Muroidea) and a reappraisal of the dichotomy within New World Cricetinae. Misc. Publ. Mus. Zool. Univ. Mich. 157, 1-146 (1980).
Peromyscus_guatemalensis	Carleton, M. D. Phylogenetic relationships in neotomine-peromyscine rodents (Muroidea) and a reappraisal of the dichotomy within New World Cricetinae. Misc. Publ. Mus. Zool. Univ. Mich. 157, 1-146 (1980).
Peromyscus_mexicanus	Carleton, M. D. Phylogenetic relationships in neotomine-peromyscine rodents (Muroidea) and a reappraisal of the dichotomy within New World Cricetinae. Misc. Publ. Mus. Zool. Univ. Mich. 157, 1-146 (1980).
Peromyscus_megalops	Carleton, M. D. Phylogenetic relationships in neotomine-peromyscine rodents (Muroidea) and a reappraisal of the dichotomy within New World Cricetinae. Misc. Publ. Mus. Zool. Univ. Mich. 157, 1-146 (1980).
Peromyscus_melanophrys	Asher, R. J., Lin, K. H., Kardjilov, N. & Hautier, L. Variability and constraint in the mammalian vertebral column. J. Evol. Biol. 24, 1080-1090 (2011).
Habromys_lepturus	Carleton, M. D. Phylogenetic relationships in neotomine-peromyscine rodents (Muroidea) and a reappraisal of the dichotomy within New World Cricetinae. Misc. Publ. Mus. Zool. Univ. Mich. 157, 1-146 (1980).
Habromys_lophurus	Carleton, M. D. Phylogenetic relationships in neotomine-peromyscine rodents (Muroidea) and a reappraisal of the dichotomy within New World Cricetinae. Misc. Publ. Mus. Zool. Univ. Mich. 157, 1-146 (1980).
Peromyscus_crinitus	Carleton, M. D. Phylogenetic relationships in neotomine-peromyscine rodents (Muroidea) and a reappraisal of the dichotomy within New World Cricetinae. Misc. Publ. Mus. Zool. Univ. Mich. 157, 1-146 (1980).
Peromyscus_ochraventer	Carleton, M. D. Phylogenetic relationships in neotomine-peromyscine rodents (Muroidea) and a reappraisal of the dichotomy within New World Cricetinae. Misc. Publ. Mus. Zool. Univ. Mich. 157, 1-146 (1980).
Peromyscus_truei	Carleton, M. D. Phylogenetic relationships in neotomine-peromyscine rodents (Muroidea) and a reappraisal of the dichotomy within New World Cricetinae. Misc. Publ. Mus. Zool. Univ. Mich. 157, 1-146 (1980).
Peromyscus_difficilis	Carleton, M. D. Phylogenetic relationships in neotomine-peromyscine rodents (Muroidea) and a reappraisal of the dichotomy within New World Cricetinae. Misc. Publ. Mus. Zool. Univ. Mich. 157, 1-146 (1980).
Peromyscus_attwateri	Carrizo, L. V. & Catalano, S. A. First phylogenetic analysis of the tribe Phyllotini (Rodentia: Sigmodontinae) combining morphological and molecular data. Cladistics 31, 593-620 (2015).
Peromyscus_furvus	Carleton, M. D. Phylogenetic relationships in neotomine-peromyscine rodents (Muroidea) and a reappraisal of the dichotomy within New World Cricetinae. Misc. Publ. Mus. Zool. Univ. Mich. 157, 1-146 (1980).
Peromyscus_spicilegus	Carleton, M. D. Phylogenetic relationships in neotomine-peromyscine rodents (Muroidea) and a reappraisal of the dichotomy within New World Cricetinae. Misc. Publ. Mus. Zool. Univ. Mich. 157, 1-146 (1980).
Peromyscus_boylii	Carleton, M. D. Phylogenetic relationships in neotomine-peromyscine rodents (Muroidea) and a reappraisal of the dichotomy within New World Cricetinae. Misc. Publ. Mus. Zool. Univ. Mich. 157, 1-146 (1980).
Podomys_floridanus	Carleton, M. D. Phylogenetic relationships in neotomine-peromyscine rodents (Muroidea) and a reappraisal of the dichotomy within New World Cricetinae. Misc. Publ. Mus. Zool. Univ. Mich. 157, 1-146 (1980).
Neotomodon_alstoni	Carleton, M. D. Phylogenetic relationships in neotomine-peromyscine rodents (Muroidea) and a reappraisal of the dichotomy within New World Cricetinae. Misc. Publ. Mus. Zool. Univ. Mich. 157, 1-146 (1980).
Peromyscus_californicus	Carleton, M. D. Phylogenetic relationships in neotomine-peromyscine rodents (Muroidea) and a reappraisal of the dichotomy within New World Cricetinae. Misc. Publ. Mus. Zool. Univ. Mich. 157, 1-146 (1980).
Peromyscus_eremicus	Carleton, M. D. Phylogenetic relationships in neotomine-peromyscine rodents (Muroidea) and a reappraisal of the dichotomy within New World Cricetinae. Misc. Publ. Mus. Zool. Univ. Mich. 157, 1-146 (1980).
Osgoodomys_banderanus	Carleton, M. D. Phylogenetic relationships in neotomine-peromyscine rodents (Muroidea) and a reappraisal of the dichotomy within New World Cricetinae. Misc. Publ. Mus. Zool. Univ. Mich. 157, 1-146 (1980).
Scotinomys_xerampelinus	Carleton, M. D. Phylogenetic relationships in neotomine-peromyscine rodents (Muroidea) and a reappraisal of the dichotomy within New World Cricetinae. Misc. Publ. Mus. Zool. Univ. Mich. 157, 1-146 (1980).
Scotinomys_teguina	Steppan, S. Revision of the tribe Phyllotini (Rodentia: Sigmondontinae), with a phylogenetic hypothesis for the Sigmodontinae. Revisión de la tribu Phyllotini (Rodentia: Sigmondontinae), con una hipótesis filogenética para los Sigmodontinae. Fieldiana Zool. 1464, 1-112 (1995).
Baiomys_taylori	Carleton, M. D. Phylogenetic relationships in neotomine-peromyscine rodents (Muroidea) and a reappraisal of the dichotomy within New World Cricetinae. Misc. Publ. Mus. Zool. Univ. Mich. 157, 1-146 (1980).
Baiomys_musculus	Steppan, S. Revision of the tribe Phyllotini (Rodentia: Sigmondontinae), with a phylogenetic hypothesis for the Sigmodontinae. Revisión de la tribu Phyllotini (Rodentia: Sigmondontinae), con una hipótesis filogenética para los Sigmodontinae. Fieldiana Zool. 1464, 1-112 (1995).
Tylomys_panamensis	Steppan, S. Revision of the tribe Phyllotini (Rodentia: Sigmondontinae), with a phylogenetic hypothesis for the Sigmodontinae. Revisión de la tribu Phyllotini (Rodentia: Sigmondontinae), con una hipótesis filogenética para los Sigmodontinae. Fieldiana Zool. 1464, 1-112 (1995).
Tylomys_mirae	Steppan, S. Revision of the tribe Phyllotini (Rodentia: Sigmondontinae), with a phylogenetic hypothesis for the Sigmodontinae. Revisión de la tribu Phyllotini (Rodentia: Sigmondontinae), con una hipótesis filogenética para los Sigmodontinae. Fieldiana Zool. 1464, 1-112 (1995).
Tylomys_watsoni	Steppan, S. Revision of the tribe Phyllotini (Rodentia: Sigmondontinae), with a phylogenetic hypothesis for the Sigmodontinae. Revisión de la tribu Phyllotini (Rodentia: Sigmondontinae), con una hipótesis filogenética para los Sigmodontinae. Fieldiana Zool. 1464, 1-112 (1995).
Tylomys_fulviventer	Steppan, S. Revision of the tribe Phyllotini (Rodentia: Sigmondontinae), with a phylogenetic hypothesis for the Sigmodontinae. Revisión de la tribu Phyllotini (Rodentia: Sigmondontinae), con una hipótesis filogenética para los Sigmodontinae. Fieldiana Zool. 1464, 1-112 (1995).
Tylomys_nudicaudus	Steppan, S. Revision of the tribe Phyllotini (Rodentia: Sigmondontinae), with a phylogenetic hypothesis for the Sigmodontinae. Revisión de la tribu Phyllotini (Rodentia: Sigmondontinae), con una hipótesis filogenética para los Sigmodontinae. Fieldiana Zool. 1464, 1-112 (1995).
Ototylomys_phyllotis	Steppan, S. Revision of the tribe Phyllotini (Rodentia: Sigmondontinae), with a phylogenetic hypothesis for the Sigmodontinae. Revisión de la tribu Phyllotini (Rodentia: Sigmondontinae), con una hipótesis filogenética para los Sigmodontinae. Fieldiana Zool. 1464, 1-112 (1995).
Nyctomys_sumichrasti	Steppan, S. Revision of the tribe Phyllotini (Rodentia: Sigmondontinae), with a phylogenetic hypothesis for the Sigmodontinae. Revisión de la tribu Phyllotini (Rodentia: Sigmondontinae), con una hipótesis filogenética para los Sigmodontinae. Fieldiana Zool. 1464, 1-112 (1995).
Chibchanomys_trichotis	Steppan, S. Revision of the tribe Phyllotini (Rodentia: Sigmondontinae), with a phylogenetic hypothesis for the Sigmodontinae. Revisión de la tribu Phyllotini (Rodentia: Sigmondontinae), con una hipótesis filogenética para los Sigmodontinae. Fieldiana Zool. 1464, 1-112 (1995).
Reithrodon_auritus	Steppan, S. Revision of the tribe Phyllotini (Rodentia: Sigmondontinae), with a phylogenetic hypothesis for the Sigmodontinae. Revisión de la tribu Phyllotini (Rodentia: Sigmondontinae), con una hipótesis filogenética para los Sigmodontinae. Fieldiana Zool. 1464, 1-112 (1995).
Rheomys_underwoodi	Steppan, S. Revision of the tribe Phyllotini (Rodentia: Sigmondontinae), with a phylogenetic hypothesis for the Sigmodontinae. Revisión de la tribu Phyllotini (Rodentia: Sigmondontinae), con una hipótesis filogenética para los Sigmodontinae. Fieldiana Zool. 1464, 1-112 (1995).
Rheomys_thomasi	Steppan, S. Revision of the tribe Phyllotini (Rodentia: Sigmondontinae), with a phylogenetic hypothesis for the Sigmodontinae. Revisión de la tribu Phyllotini (Rodentia: Sigmondontinae), con una hipótesis filogenética para los Sigmodontinae. Fieldiana Zool. 1464, 1-112 (1995).
Rheomys_mexicanus	Steppan, S. Revision of the tribe Phyllotini (Rodentia: Sigmondontinae), with a phylogenetic hypothesis for the Sigmodontinae. Revisión de la tribu Phyllotini (Rodentia: Sigmondontinae), con una hipótesis filogenética para los Sigmodontinae. Fieldiana Zool. 1464, 1-112 (1995).
Rheomys_raptor	Steppan, S. Revision of the tribe Phyllotini (Rodentia: Sigmondontinae), with a phylogenetic hypothesis for the Sigmodontinae. Revisión de la tribu Phyllotini (Rodentia: Sigmondontinae), con una hipótesis filogenética para los Sigmodontinae. Fieldiana Zool. 1464, 1-112 (1995).
Ichthyomys_pittieri	Steppan, S. Revision of the tribe Phyllotini (Rodentia: Sigmondontinae), with a phylogenetic hypothesis for the Sigmodontinae. Revisión de la tribu Phyllotini (Rodentia: Sigmondontinae), con una hipótesis filogenética para los Sigmodontinae. Fieldiana Zool. 1464, 1-112 (1995).
Ichthyomys_hydrobates	Steppan, S. Revision of the tribe Phyllotini (Rodentia: Sigmondontinae), with a phylogenetic hypothesis for the Sigmodontinae. Revisión de la tribu Phyllotini (Rodentia: Sigmondontinae), con una hipótesis filogenética para los Sigmodontinae. Fieldiana Zool. 1464, 1-112 (1995).
Ichthyomys_tweedii	Steppan, S. Revision of the tribe Phyllotini (Rodentia: Sigmondontinae), with a phylogenetic hypothesis for the Sigmodontinae. Revisión de la tribu Phyllotini (Rodentia: Sigmondontinae), con una hipótesis filogenética para los Sigmodontinae. Fieldiana Zool. 1464, 1-112 (1995).
Neusticomys_venezuelae	Steppan, S. Revision of the tribe Phyllotini (Rodentia: Sigmondontinae), with a phylogenetic hypothesis for the Sigmodontinae. Revisión de la tribu Phyllotini (Rodentia: Sigmondontinae), con una hipótesis filogenética para los Sigmodontinae. Fieldiana Zool. 1464, 1-112 (1995).
Neusticomys_ferreirai	Percequillo, A. R., Carmignotto, A. P., & Silva, M. D. J. A new species of Neusticomys (Ichthyomyini, Sigmodontinae) from central Brazilian Amazonia. J. Mammal. 86, 873-880 (2005).
Neusticomys_monticolus	Steppan, S. Revision of the tribe Phyllotini (Rodentia: Sigmondontinae), with a phylogenetic hypothesis for the Sigmodontinae. Revisión de la tribu Phyllotini (Rodentia: Sigmondontinae), con una hipótesis filogenética para los Sigmodontinae. Fieldiana Zool. 1464, 1-112 (1995).
Anotomys_leander	Steppan, S. Revision of the tribe Phyllotini (Rodentia: Sigmondontinae), with a phylogenetic hypothesis for the Sigmodontinae. Revisión de la tribu Phyllotini (Rodentia: Sigmondontinae), con una hipótesis filogenética para los Sigmodontinae. Fieldiana Zool. 1464, 1-112 (1995).
Chinchillula_sahamae	Steppan, S. Revision of the tribe Phyllotini (Rodentia: Sigmondontinae), with a phylogenetic hypothesis for the Sigmodontinae. Revisión de la tribu Phyllotini (Rodentia: Sigmondontinae), con una hipótesis filogenética para los Sigmodontinae. Fieldiana Zool. 1464, 1-112 (1995).
Sigmodon_leucotis	Steppan, S. Revision of the tribe Phyllotini (Rodentia: Sigmondontinae), with a phylogenetic hypothesis for the Sigmodontinae. Revisión de la tribu Phyllotini (Rodentia: Sigmondontinae), con una hipótesis filogenética para los Sigmodontinae. Fieldiana Zool. 1464, 1-112 (1995).
Sigmodon_fulviventer	Steppan, S. Revision of the tribe Phyllotini (Rodentia: Sigmondontinae), with a phylogenetic hypothesis for the Sigmodontinae. Revisión de la tribu Phyllotini (Rodentia: Sigmondontinae), con una hipótesis filogenética para los Sigmodontinae. Fieldiana Zool. 1464, 1-112 (1995).
Sigmodon_alleni	Steppan, S. Revision of the tribe Phyllotini (Rodentia: Sigmondontinae), with a phylogenetic hypothesis for the Sigmodontinae. Revisión de la tribu Phyllotini (Rodentia: Sigmondontinae), con una hipótesis filogenética para los Sigmodontinae. Fieldiana Zool. 1464, 1-112 (1995).
Sigmodon_ochrognathus	Steppan, S. Revision of the tribe Phyllotini (Rodentia: Sigmondontinae), with a phylogenetic hypothesis for the Sigmodontinae. Revisión de la tribu Phyllotini (Rodentia: Sigmondontinae), con una hipótesis filogenética para los Sigmodontinae. Fieldiana Zool. 1464, 1-112 (1995).
Sigmodon_hispidus	Steppan, S. Revision of the tribe Phyllotini (Rodentia: Sigmondontinae), with a phylogenetic hypothesis for the Sigmodontinae. Revisión de la tribu Phyllotini (Rodentia: Sigmondontinae), con una hipótesis filogenética para los Sigmodontinae. Fieldiana Zool. 1464, 1-112 (1995).
Rhipidomys_macconnelli	Steppan, S. Revision of the tribe Phyllotini (Rodentia: Sigmondontinae), with a phylogenetic hypothesis for the Sigmodontinae. Revisión de la tribu Phyllotini (Rodentia: Sigmondontinae), con una hipótesis filogenética para los Sigmodontinae. Fieldiana Zool. 1464, 1-112 (1995).
Rhipidomys_nitela	Steppan, S. Revision of the tribe Phyllotini (Rodentia: Sigmondontinae), with a phylogenetic hypothesis for the Sigmodontinae. Revisión de la tribu Phyllotini (Rodentia: Sigmondontinae), con una hipótesis filogenética para los Sigmodontinae. Fieldiana Zool. 1464, 1-112 (1995).
Rhipidomys_mastacalis	Steppan, S. Revision of the tribe Phyllotini (Rodentia: Sigmondontinae), with a phylogenetic hypothesis for the Sigmodontinae. Revisión de la tribu Phyllotini (Rodentia: Sigmondontinae), con una hipótesis filogenética para los Sigmodontinae. Fieldiana Zool. 1464, 1-112 (1995).
Rhipidomys_fulviventer	Steppan, S. Revision of the tribe Phyllotini (Rodentia: Sigmondontinae), with a phylogenetic hypothesis for the Sigmodontinae. Revisión de la tribu Phyllotini (Rodentia: Sigmondontinae), con una hipótesis filogenética para los Sigmodontinae. Fieldiana Zool. 1464, 1-112 (1995).
Rhipidomys_venustus	Steppan, S. Revision of the tribe Phyllotini (Rodentia: Sigmondontinae), with a phylogenetic hypothesis for the Sigmodontinae. Revisión de la tribu Phyllotini (Rodentia: Sigmondontinae), con una hipótesis filogenética para los Sigmodontinae. Fieldiana Zool. 1464, 1-112 (1995).
Rhipidomys_couesi	Steppan, S. Revision of the tribe Phyllotini (Rodentia: Sigmondontinae), with a phylogenetic hypothesis for the Sigmodontinae. Revisión de la tribu Phyllotini (Rodentia: Sigmondontinae), con una hipótesis filogenética para los Sigmodontinae. Fieldiana Zool. 1464, 1-112 (1995).
Rhipidomys_venezuelae	Steppan, S. Revision of the tribe Phyllotini (Rodentia: Sigmondontinae), with a phylogenetic hypothesis for the Sigmodontinae. Revisión de la tribu Phyllotini (Rodentia: Sigmondontinae), con una hipótesis filogenética para los Sigmodontinae. Fieldiana Zool. 1464, 1-112 (1995).
Rhipidomys_latimanus	Steppan, S. Revision of the tribe Phyllotini (Rodentia: Sigmondontinae), with a phylogenetic hypothesis for the Sigmodontinae. Revisión de la tribu Phyllotini (Rodentia: Sigmondontinae), con una hipótesis filogenética para los Sigmodontinae. Fieldiana Zool. 1464, 1-112 (1995).
Rhipidomys_austrinus	Carrizo, L. V. & Catalano, S. A. First phylogenetic analysis of the tribe Phyllotini (Rodentia: Sigmodontinae) combining morphological and molecular data. Cladistics 31, 593-620 (2015).
Aepeomys_lugens	Steppan, S. Revision of the tribe Phyllotini (Rodentia: Sigmondontinae), with a phylogenetic hypothesis for the Sigmodontinae. Revisión de la tribu Phyllotini (Rodentia: Sigmondontinae), con una hipótesis filogenética para los Sigmodontinae. Fieldiana Zool. 1464, 1-112 (1995).
Thomasomys_gracilis	Steppan, S. Revision of the tribe Phyllotini (Rodentia: Sigmondontinae), with a phylogenetic hypothesis for the Sigmodontinae. Revisión de la tribu Phyllotini (Rodentia: Sigmondontinae), con una hipótesis filogenética para los Sigmodontinae. Fieldiana Zool. 1464, 1-112 (1995).
Thomasomys_cinereus	Steppan, S. Revision of the tribe Phyllotini (Rodentia: Sigmondontinae), with a phylogenetic hypothesis for the Sigmodontinae. Revisión de la tribu Phyllotini (Rodentia: Sigmondontinae), con una hipótesis filogenética para los Sigmodontinae. Fieldiana Zool. 1464, 1-112 (1995).
Thomasomys_rhoadsi	Steppan, S. Revision of the tribe Phyllotini (Rodentia: Sigmondontinae), with a phylogenetic hypothesis for the Sigmodontinae. Revisión de la tribu Phyllotini (Rodentia: Sigmondontinae), con una hipótesis filogenética para los Sigmodontinae. Fieldiana Zool. 1464, 1-112 (1995).
Thomasomys_baeops	Steppan, S. Revision of the tribe Phyllotini (Rodentia: Sigmondontinae), with a phylogenetic hypothesis for the Sigmodontinae. Revisión de la tribu Phyllotini (Rodentia: Sigmondontinae), con una hipótesis filogenética para los Sigmodontinae. Fieldiana Zool. 1464, 1-112 (1995).
Thomasomys_aureus	Steppan, S. Revision of the tribe Phyllotini (Rodentia: Sigmondontinae), with a phylogenetic hypothesis for the Sigmodontinae. Revisión de la tribu Phyllotini (Rodentia: Sigmondontinae), con una hipótesis filogenética para los Sigmodontinae. Fieldiana Zool. 1464, 1-112 (1995).
Thomasomys_pyrrhonotus	Steppan, S. Revision of the tribe Phyllotini (Rodentia: Sigmondontinae), with a phylogenetic hypothesis for the Sigmodontinae. Revisión de la tribu Phyllotini (Rodentia: Sigmondontinae), con una hipótesis filogenética para los Sigmodontinae. Fieldiana Zool. 1464, 1-112 (1995).
Thomasomys_daphne	Steppan, S. Revision of the tribe Phyllotini (Rodentia: Sigmondontinae), with a phylogenetic hypothesis for the Sigmodontinae. Revisión de la tribu Phyllotini (Rodentia: Sigmondontinae), con una hipótesis filogenética para los Sigmodontinae. Fieldiana Zool. 1464, 1-112 (1995).
Thomasomys_oreas	Steppan, S. Revision of the tribe Phyllotini (Rodentia: Sigmondontinae), with a phylogenetic hypothesis for the Sigmodontinae. Revisión de la tribu Phyllotini (Rodentia: Sigmondontinae), con una hipótesis filogenética para los Sigmodontinae. Fieldiana Zool. 1464, 1-112 (1995).
Thomasomys_hylophilus	Steppan, S. Revision of the tribe Phyllotini (Rodentia: Sigmondontinae), with a phylogenetic hypothesis for the Sigmodontinae. Revisión de la tribu Phyllotini (Rodentia: Sigmondontinae), con una hipótesis filogenética para los Sigmodontinae. Fieldiana Zool. 1464, 1-112 (1995).
Thomasomys_paramorum	Steppan, S. Revision of the tribe Phyllotini (Rodentia: Sigmondontinae), with a phylogenetic hypothesis for the Sigmodontinae. Revisión de la tribu Phyllotini (Rodentia: Sigmondontinae), con una hipótesis filogenética para los Sigmodontinae. Fieldiana Zool. 1464, 1-112 (1995).
Chilomys_instans	Steppan, S. Revision of the tribe Phyllotini (Rodentia: Sigmondontinae), with a phylogenetic hypothesis for the Sigmodontinae. Revisión de la tribu Phyllotini (Rodentia: Sigmondontinae), con una hipótesis filogenética para los Sigmodontinae. Fieldiana Zool. 1464, 1-112 (1995).
Akodon_bogotensis	Steppan, S. Revision of the tribe Phyllotini (Rodentia: Sigmondontinae), with a phylogenetic hypothesis for the Sigmodontinae. Revisión de la tribu Phyllotini (Rodentia: Sigmondontinae), con una hipótesis filogenética para los Sigmodontinae. Fieldiana Zool. 1464, 1-112 (1995).
Blarinomys_breviceps	Carrizo, L. V. & Catalano, S. A. First phylogenetic analysis of the tribe Phyllotini (Rodentia: Sigmodontinae) combining morphological and molecular data. Cladistics 31, 593-620 (2015).
Scapteromys_tumidus	Steppan, S. Revision of the tribe Phyllotini (Rodentia: Sigmondontinae), with a phylogenetic hypothesis for the Sigmodontinae. Revisión de la tribu Phyllotini (Rodentia: Sigmondontinae), con una hipótesis filogenética para los Sigmodontinae. Fieldiana Zool. 1464, 1-112 (1995).
Scapteromys_meridionalis	Quintela, F. M., Gonçalves, G. L., Althoff, S. L., Sbalqueiro, I. J., Oliveira, L. F. B. & Freitas, T. R. O. A new species of swamp rat of the genus Scapteromys Waterhouse, 1837 (Rodentia: Sigmodontinae) endemic to Araucaria angustifolia Forest in Southern Brazil. Zootaxa 3811, 207-225 (2014).
Scapteromys_aquaticus	Carrizo, L. V. & Catalano, S. A. First phylogenetic analysis of the tribe Phyllotini (Rodentia: Sigmodontinae) combining morphological and molecular data. Cladistics 31, 593-620 (2015).
Kunsia_tomentosus	Bezerra, A. M. & Pardiñas, U. F. Kunsia tomentosus (Rodentia: Cricetidae). Mamm. Spec., 48, 1-9 (2016).
Thalpomys_lasiotis	Steppan, S. Revision of the tribe Phyllotini (Rodentia: Sigmondontinae), with a phylogenetic hypothesis for the Sigmodontinae. Revisión de la tribu Phyllotini (Rodentia: Sigmondontinae), con una hipótesis filogenética para los Sigmodontinae. Fieldiana Zool. 1464, 1-112 (1995).
Necromys_amoenus	Steppan, S. Revision of the tribe Phyllotini (Rodentia: Sigmondontinae), with a phylogenetic hypothesis for the Sigmodontinae. Revisión de la tribu Phyllotini (Rodentia: Sigmondontinae), con una hipótesis filogenética para los Sigmodontinae. Fieldiana Zool. 1464, 1-112 (1995).
Necromys_urichi	Steppan, S. Revision of the tribe Phyllotini (Rodentia: Sigmondontinae), with a phylogenetic hypothesis for the Sigmodontinae. Revisión de la tribu Phyllotini (Rodentia: Sigmondontinae), con una hipótesis filogenética para los Sigmodontinae. Fieldiana Zool. 1464, 1-112 (1995).
Necromys_lasiurus	Steppan, S. Revision of the tribe Phyllotini (Rodentia: Sigmondontinae), with a phylogenetic hypothesis for the Sigmodontinae. Revisión de la tribu Phyllotini (Rodentia: Sigmondontinae), con una hipótesis filogenética para los Sigmodontinae. Fieldiana Zool. 1464, 1-112 (1995).
Necromys_temchuki	Steppan, S. Revision of the tribe Phyllotini (Rodentia: Sigmondontinae), with a phylogenetic hypothesis for the Sigmodontinae. Revisión de la tribu Phyllotini (Rodentia: Sigmondontinae), con una hipótesis filogenética para los Sigmodontinae. Fieldiana Zool. 1464, 1-112 (1995).
Necromys_obscurus	Steppan, S. Revision of the tribe Phyllotini (Rodentia: Sigmondontinae), with a phylogenetic hypothesis for the Sigmodontinae. Revisión de la tribu Phyllotini (Rodentia: Sigmondontinae), con una hipótesis filogenética para los Sigmodontinae. Fieldiana Zool. 1464, 1-112 (1995).
Necromys_lactens	Carrizo, L. V. & Catalano, S. A. First phylogenetic analysis of the tribe Phyllotini (Rodentia: Sigmodontinae) combining morphological and molecular data. Cladistics 31, 593-620 (2015).
Akodon_mimus	Steppan, S. Revision of the tribe Phyllotini (Rodentia: Sigmondontinae), with a phylogenetic hypothesis for the Sigmodontinae. Revisión de la tribu Phyllotini (Rodentia: Sigmondontinae), con una hipótesis filogenética para los Sigmodontinae. Fieldiana Zool. 1464, 1-112 (1995).
Akodon_azarae	Steppan, S. Revision of the tribe Phyllotini (Rodentia: Sigmondontinae), with a phylogenetic hypothesis for the Sigmodontinae. Revisión de la tribu Phyllotini (Rodentia: Sigmondontinae), con una hipótesis filogenética para los Sigmodontinae. Fieldiana Zool. 1464, 1-112 (1995).
Akodon_boliviensis	Steppan, S. Revision of the tribe Phyllotini (Rodentia: Sigmondontinae), with a phylogenetic hypothesis for the Sigmodontinae. Revisión de la tribu Phyllotini (Rodentia: Sigmondontinae), con una hipótesis filogenética para los Sigmodontinae. Fieldiana Zool. 1464, 1-112 (1995).
Akodon_subfuscus	Steppan, S. Revision of the tribe Phyllotini (Rodentia: Sigmondontinae), with a phylogenetic hypothesis for the Sigmodontinae. Revisión de la tribu Phyllotini (Rodentia: Sigmondontinae), con una hipótesis filogenética para los Sigmodontinae. Fieldiana Zool. 1464, 1-112 (1995).
Akodon_lutescens	Steppan, S. Revision of the tribe Phyllotini (Rodentia: Sigmondontinae), with a phylogenetic hypothesis for the Sigmodontinae. Revisión de la tribu Phyllotini (Rodentia: Sigmondontinae), con una hipótesis filogenética para los Sigmodontinae. Fieldiana Zool. 1464, 1-112 (1995).
Akodon_cursor	Steppan, S. Revision of the tribe Phyllotini (Rodentia: Sigmondontinae), with a phylogenetic hypothesis for the Sigmodontinae. Revisión de la tribu Phyllotini (Rodentia: Sigmondontinae), con una hipótesis filogenética para los Sigmodontinae. Fieldiana Zool. 1464, 1-112 (1995).
Akodon_simulator	Carrizo, L. V. & Catalano, S. A. First phylogenetic analysis of the tribe Phyllotini (Rodentia: Sigmodontinae) combining morphological and molecular data. Cladistics 31, 593-620 (2015).
Akodon_albiventer	Steppan, S. Revision of the tribe Phyllotini (Rodentia: Sigmondontinae), with a phylogenetic hypothesis for the Sigmodontinae. Revisión de la tribu Phyllotini (Rodentia: Sigmondontinae), con una hipótesis filogenética para los Sigmodontinae. Fieldiana Zool. 1464, 1-112 (1995).
Akodon_mollis	Steppan, S. Revision of the tribe Phyllotini (Rodentia: Sigmondontinae), with a phylogenetic hypothesis for the Sigmodontinae. Revisión de la tribu Phyllotini (Rodentia: Sigmondontinae), con una hipótesis filogenética para los Sigmodontinae. Fieldiana Zool. 1464, 1-112 (1995).
Akodon_torques	Steppan, S. Revision of the tribe Phyllotini (Rodentia: Sigmondontinae), with a phylogenetic hypothesis for the Sigmodontinae. Revisión de la tribu Phyllotini (Rodentia: Sigmondontinae), con una hipótesis filogenética para los Sigmodontinae. Fieldiana Zool. 1464, 1-112 (1995).
Akodon_aerosus	Steppan, S. Revision of the tribe Phyllotini (Rodentia: Sigmondontinae), with a phylogenetic hypothesis for the Sigmodontinae. Revisión de la tribu Phyllotini (Rodentia: Sigmondontinae), con una hipótesis filogenética para los Sigmodontinae. Fieldiana Zool. 1464, 1-112 (1995).
Deltamys_kempi	Steppan, S. Revision of the tribe Phyllotini (Rodentia: Sigmondontinae), with a phylogenetic hypothesis for the Sigmodontinae. Revisión de la tribu Phyllotini (Rodentia: Sigmondontinae), con una hipótesis filogenética para los Sigmodontinae. Fieldiana Zool. 1464, 1-112 (1995).
Thaptomys_nigrita	Steppan, S. Revision of the tribe Phyllotini (Rodentia: Sigmondontinae), with a phylogenetic hypothesis for the Sigmodontinae. Revisión de la tribu Phyllotini (Rodentia: Sigmondontinae), con una hipótesis filogenética para los Sigmodontinae. Fieldiana Zool. 1464, 1-112 (1995).
Oxymycterus_delator	Steppan, S. Revision of the tribe Phyllotini (Rodentia: Sigmondontinae), with a phylogenetic hypothesis for the Sigmodontinae. Revisión de la tribu Phyllotini (Rodentia: Sigmondontinae), con una hipótesis filogenética para los Sigmodontinae. Fieldiana Zool. 1464, 1-112 (1995).
Oxymycterus_paramensis	Carrizo, L. V. & Catalano, S. A. First phylogenetic analysis of the tribe Phyllotini (Rodentia: Sigmodontinae) combining morphological and molecular data. Cladistics 31, 593-620 (2015).
Oxymycterus_rufus	Steppan, S. Revision of the tribe Phyllotini (Rodentia: Sigmondontinae), with a phylogenetic hypothesis for the Sigmodontinae. Revisión de la tribu Phyllotini (Rodentia: Sigmondontinae), con una hipótesis filogenética para los Sigmodontinae. Fieldiana Zool. 1464, 1-112 (1995).
Oxymycterus_inca	Steppan, S. Revision of the tribe Phyllotini (Rodentia: Sigmondontinae), with a phylogenetic hypothesis for the Sigmodontinae. Revisión de la tribu Phyllotini (Rodentia: Sigmondontinae), con una hipótesis filogenética para los Sigmodontinae. Fieldiana Zool. 1464, 1-112 (1995).
Zygodontomys_brevicauda	Steppan, S. Revision of the tribe Phyllotini (Rodentia: Sigmondontinae), with a phylogenetic hypothesis for the Sigmodontinae. Revisión de la tribu Phyllotini (Rodentia: Sigmondontinae), con una hipótesis filogenética para los Sigmodontinae. Fieldiana Zool. 1464, 1-112 (1995).
Oecomys_concolor	Steppan, S. Revision of the tribe Phyllotini (Rodentia: Sigmondontinae), with a phylogenetic hypothesis for the Sigmodontinae. Revisión de la tribu Phyllotini (Rodentia: Sigmondontinae), con una hipótesis filogenética para los Sigmodontinae. Fieldiana Zool. 1464, 1-112 (1995).
Oecomys_roberti	Steppan, S. Revision of the tribe Phyllotini (Rodentia: Sigmondontinae), with a phylogenetic hypothesis for the Sigmodontinae. Revisión de la tribu Phyllotini (Rodentia: Sigmondontinae), con una hipótesis filogenética para los Sigmodontinae. Fieldiana Zool. 1464, 1-112 (1995).
Oecomys_bicolor	Steppan, S. Revision of the tribe Phyllotini (Rodentia: Sigmondontinae), with a phylogenetic hypothesis for the Sigmodontinae. Revisión de la tribu Phyllotini (Rodentia: Sigmondontinae), con una hipótesis filogenética para los Sigmodontinae. Fieldiana Zool. 1464, 1-112 (1995).
Oecomys_superans	Steppan, S. Revision of the tribe Phyllotini (Rodentia: Sigmondontinae), with a phylogenetic hypothesis for the Sigmodontinae. Revisión de la tribu Phyllotini (Rodentia: Sigmondontinae), con una hipótesis filogenética para los Sigmodontinae. Fieldiana Zool. 1464, 1-112 (1995).
Oecomys_trinitatis	Steppan, S. Revision of the tribe Phyllotini (Rodentia: Sigmondontinae), with a phylogenetic hypothesis for the Sigmodontinae. Revisión de la tribu Phyllotini (Rodentia: Sigmondontinae), con una hipótesis filogenética para los Sigmodontinae. Fieldiana Zool. 1464, 1-112 (1995).
Oecomys_mamorae	Steppan, S. Revision of the tribe Phyllotini (Rodentia: Sigmondontinae), with a phylogenetic hypothesis for the Sigmodontinae. Revisión de la tribu Phyllotini (Rodentia: Sigmondontinae), con una hipótesis filogenética para los Sigmodontinae. Fieldiana Zool. 1464, 1-112 (1995).
Oecomys_paricola	Steppan, S. Revision of the tribe Phyllotini (Rodentia: Sigmondontinae), with a phylogenetic hypothesis for the Sigmodontinae. Revisión de la tribu Phyllotini (Rodentia: Sigmondontinae), con una hipótesis filogenética para los Sigmodontinae. Fieldiana Zool. 1464, 1-112 (1995).
Transandinomys_talamancae	Steppan, S. Revision of the tribe Phyllotini (Rodentia: Sigmondontinae), with a phylogenetic hypothesis for the Sigmodontinae. Revisión de la tribu Phyllotini (Rodentia: Sigmondontinae), con una hipótesis filogenética para los Sigmodontinae. Fieldiana Zool. 1464, 1-112 (1995).
Transandinomys_bolivaris	Steppan, S. Revision of the tribe Phyllotini (Rodentia: Sigmondontinae), with a phylogenetic hypothesis for the Sigmodontinae. Revisión de la tribu Phyllotini (Rodentia: Sigmondontinae), con una hipótesis filogenética para los Sigmodontinae. Fieldiana Zool. 1464, 1-112 (1995).
Euryoryzomys_nitidus	Steppan, S. Revision of the tribe Phyllotini (Rodentia: Sigmondontinae), with a phylogenetic hypothesis for the Sigmodontinae. Revisión de la tribu Phyllotini (Rodentia: Sigmondontinae), con una hipótesis filogenética para los Sigmodontinae. Fieldiana Zool. 1464, 1-112 (1995).
Euryoryzomys_russatus	Steppan, S. Revision of the tribe Phyllotini (Rodentia: Sigmondontinae), with a phylogenetic hypothesis for the Sigmodontinae. Revisión de la tribu Phyllotini (Rodentia: Sigmondontinae), con una hipótesis filogenética para los Sigmodontinae. Fieldiana Zool. 1464, 1-112 (1995).
Euryoryzomys_legatus	Carrizo, L. V. & Catalano, S. A. First phylogenetic analysis of the tribe Phyllotini (Rodentia: Sigmodontinae) combining morphological and molecular data. Cladistics 31, 593-620 (2015).
Nephelomys_albigularis	Steppan, S. Revision of the tribe Phyllotini (Rodentia: Sigmondontinae), with a phylogenetic hypothesis for the Sigmodontinae. Revisión de la tribu Phyllotini (Rodentia: Sigmondontinae), con una hipótesis filogenética para los Sigmodontinae. Fieldiana Zool. 1464, 1-112 (1995).
Nephelomys_keaysi	Steppan, S. Revision of the tribe Phyllotini (Rodentia: Sigmondontinae), with a phylogenetic hypothesis for the Sigmodontinae. Revisión de la tribu Phyllotini (Rodentia: Sigmondontinae), con una hipótesis filogenética para los Sigmodontinae. Fieldiana Zool. 1464, 1-112 (1995).
Hylaeamys_megacephalus	Steppan, S. Revision of the tribe Phyllotini (Rodentia: Sigmondontinae), with a phylogenetic hypothesis for the Sigmodontinae. Revisión de la tribu Phyllotini (Rodentia: Sigmondontinae), con una hipótesis filogenética para los Sigmodontinae. Fieldiana Zool. 1464, 1-112 (1995).
Handleyomys_alfaroi	Steppan, S. Revision of the tribe Phyllotini (Rodentia: Sigmondontinae), with a phylogenetic hypothesis for the Sigmodontinae. Revisión de la tribu Phyllotini (Rodentia: Sigmondontinae), con una hipótesis filogenética para los Sigmodontinae. Fieldiana Zool. 1464, 1-112 (1995).
Handleyomys_melanotis	Steppan, S. Revision of the tribe Phyllotini (Rodentia: Sigmondontinae), with a phylogenetic hypothesis for the Sigmodontinae. Revisión de la tribu Phyllotini (Rodentia: Sigmondontinae), con una hipótesis filogenética para los Sigmodontinae. Fieldiana Zool. 1464, 1-112 (1995).
Handleyomys_chapmani	Steppan, S. Revision of the tribe Phyllotini (Rodentia: Sigmondontinae), with a phylogenetic hypothesis for the Sigmodontinae. Revisión de la tribu Phyllotini (Rodentia: Sigmondontinae), con una hipótesis filogenética para los Sigmodontinae. Fieldiana Zool. 1464, 1-112 (1995).
Neacomys_guianae	Steppan, S. Revision of the tribe Phyllotini (Rodentia: Sigmondontinae), with a phylogenetic hypothesis for the Sigmodontinae. Revisión de la tribu Phyllotini (Rodentia: Sigmondontinae), con una hipótesis filogenética para los Sigmodontinae. Fieldiana Zool. 1464, 1-112 (1995).
Neacomys_spinosus	Steppan, S. Revision of the tribe Phyllotini (Rodentia: Sigmondontinae), with a phylogenetic hypothesis for the Sigmodontinae. Revisión de la tribu Phyllotini (Rodentia: Sigmondontinae), con una hipótesis filogenética para los Sigmodontinae. Fieldiana Zool. 1464, 1-112 (1995).
Neacomys_tenuipes	Steppan, S. Revision of the tribe Phyllotini (Rodentia: Sigmondontinae), with a phylogenetic hypothesis for the Sigmodontinae. Revisión de la tribu Phyllotini (Rodentia: Sigmondontinae), con una hipótesis filogenética para los Sigmodontinae. Fieldiana Zool. 1464, 1-112 (1995).
Microryzomys_minutus	Steppan, S. Revision of the tribe Phyllotini (Rodentia: Sigmondontinae), with a phylogenetic hypothesis for the Sigmodontinae. Revisión de la tribu Phyllotini (Rodentia: Sigmondontinae), con una hipótesis filogenética para los Sigmodontinae. Fieldiana Zool. 1464, 1-112 (1995).
Microryzomys_altissimus	Steppan, S. Revision of the tribe Phyllotini (Rodentia: Sigmondontinae), with a phylogenetic hypothesis for the Sigmodontinae. Revisión de la tribu Phyllotini (Rodentia: Sigmondontinae), con una hipótesis filogenética para los Sigmodontinae. Fieldiana Zool. 1464, 1-112 (1995).
Oligoryzomys_microtis	Steppan, S. Revision of the tribe Phyllotini (Rodentia: Sigmondontinae), with a phylogenetic hypothesis for the Sigmodontinae. Revisión de la tribu Phyllotini (Rodentia: Sigmondontinae), con una hipótesis filogenética para los Sigmodontinae. Fieldiana Zool. 1464, 1-112 (1995).
Oligoryzomys_nigripes	Steppan, S. Revision of the tribe Phyllotini (Rodentia: Sigmondontinae), with a phylogenetic hypothesis for the Sigmodontinae. Revisión de la tribu Phyllotini (Rodentia: Sigmondontinae), con una hipótesis filogenética para los Sigmodontinae. Fieldiana Zool. 1464, 1-112 (1995).
Oligoryzomys_destructor	Steppan, S. Revision of the tribe Phyllotini (Rodentia: Sigmondontinae), with a phylogenetic hypothesis for the Sigmodontinae. Revisión de la tribu Phyllotini (Rodentia: Sigmondontinae), con una hipótesis filogenética para los Sigmodontinae. Fieldiana Zool. 1464, 1-112 (1995).
Oligoryzomys_fulvescens	Steppan, S. Revision of the tribe Phyllotini (Rodentia: Sigmondontinae), with a phylogenetic hypothesis for the Sigmodontinae. Revisión de la tribu Phyllotini (Rodentia: Sigmondontinae), con una hipótesis filogenética para los Sigmodontinae. Fieldiana Zool. 1464, 1-112 (1995).
Oligoryzomys_eliurus	Steppan, S. Revision of the tribe Phyllotini (Rodentia: Sigmondontinae), with a phylogenetic hypothesis for the Sigmodontinae. Revisión de la tribu Phyllotini (Rodentia: Sigmondontinae), con una hipótesis filogenética para los Sigmodontinae. Fieldiana Zool. 1464, 1-112 (1995).
Oligoryzomys_delticola	Steppan, S. Revision of the tribe Phyllotini (Rodentia: Sigmondontinae), with a phylogenetic hypothesis for the Sigmodontinae. Revisión de la tribu Phyllotini (Rodentia: Sigmondontinae), con una hipótesis filogenética para los Sigmodontinae. Fieldiana Zool. 1464, 1-112 (1995).
Oligoryzomys_chacoensis	Steppan, S. Revision of the tribe Phyllotini (Rodentia: Sigmondontinae), with a phylogenetic hypothesis for the Sigmodontinae. Revisión de la tribu Phyllotini (Rodentia: Sigmondontinae), con una hipótesis filogenética para los Sigmodontinae. Fieldiana Zool. 1464, 1-112 (1995).
Oligoryzomys_andinus	Steppan, S. Revision of the tribe Phyllotini (Rodentia: Sigmondontinae), with a phylogenetic hypothesis for the Sigmodontinae. Revisión de la tribu Phyllotini (Rodentia: Sigmondontinae), con una hipótesis filogenética para los Sigmodontinae. Fieldiana Zool. 1464, 1-112 (1995).
Oligoryzomys_magellanicus	Steppan, S. Revision of the tribe Phyllotini (Rodentia: Sigmondontinae), with a phylogenetic hypothesis for the Sigmodontinae. Revisión de la tribu Phyllotini (Rodentia: Sigmondontinae), con una hipótesis filogenética para los Sigmodontinae. Fieldiana Zool. 1464, 1-112 (1995).
Oligoryzomys_longicaudatus	Steppan, S. Revision of the tribe Phyllotini (Rodentia: Sigmondontinae), with a phylogenetic hypothesis for the Sigmodontinae. Revisión de la tribu Phyllotini (Rodentia: Sigmondontinae), con una hipótesis filogenética para los Sigmodontinae. Fieldiana Zool. 1464, 1-112 (1995).
Oligoryzomys_flavescens	Steppan, S. Revision of the tribe Phyllotini (Rodentia: Sigmondontinae), with a phylogenetic hypothesis for the Sigmodontinae. Revisión de la tribu Phyllotini (Rodentia: Sigmondontinae), con una hipótesis filogenética para los Sigmodontinae. Fieldiana Zool. 1464, 1-112 (1995).
Eremoryzomys_polius	Steppan, S. Revision of the tribe Phyllotini (Rodentia: Sigmondontinae), with a phylogenetic hypothesis for the Sigmodontinae. Revisión de la tribu Phyllotini (Rodentia: Sigmondontinae), con una hipótesis filogenética para los Sigmodontinae. Fieldiana Zool. 1464, 1-112 (1995).
Cerradomys_subflavus	Steppan, S. Revision of the tribe Phyllotini (Rodentia: Sigmondontinae), with a phylogenetic hypothesis for the Sigmodontinae. Revisión de la tribu Phyllotini (Rodentia: Sigmondontinae), con una hipótesis filogenética para los Sigmodontinae. Fieldiana Zool. 1464, 1-112 (1995).
Sooretamys_angouya	Steppan, S. Revision of the tribe Phyllotini (Rodentia: Sigmondontinae), with a phylogenetic hypothesis for the Sigmodontinae. Revisión de la tribu Phyllotini (Rodentia: Sigmondontinae), con una hipótesis filogenética para los Sigmodontinae. Fieldiana Zool. 1464, 1-112 (1995).
Holochilus_brasiliensis	Steppan, S. Revision of the tribe Phyllotini (Rodentia: Sigmondontinae), with a phylogenetic hypothesis for the Sigmodontinae. Revisión de la tribu Phyllotini (Rodentia: Sigmondontinae), con una hipótesis filogenética para los Sigmodontinae. Fieldiana Zool. 1464, 1-112 (1995).
Holochilus_chacarius	Steppan, S. Revision of the tribe Phyllotini (Rodentia: Sigmondontinae), with a phylogenetic hypothesis for the Sigmodontinae. Revisión de la tribu Phyllotini (Rodentia: Sigmondontinae), con una hipótesis filogenética para los Sigmodontinae. Fieldiana Zool. 1464, 1-112 (1995).
Pseudoryzomys_simplex	Steppan, S. Revision of the tribe Phyllotini (Rodentia: Sigmondontinae), with a phylogenetic hypothesis for the Sigmodontinae. Revisión de la tribu Phyllotini (Rodentia: Sigmondontinae), con una hipótesis filogenética para los Sigmodontinae. Fieldiana Zool. 1464, 1-112 (1995).
Lundomys_molitor	Steppan, S. Revision of the tribe Phyllotini (Rodentia: Sigmondontinae), with a phylogenetic hypothesis for the Sigmodontinae. Revisión de la tribu Phyllotini (Rodentia: Sigmondontinae), con una hipótesis filogenética para los Sigmodontinae. Fieldiana Zool. 1464, 1-112 (1995).
Nectomys_squamipes	Steppan, S. Revision of the tribe Phyllotini (Rodentia: Sigmondontinae), with a phylogenetic hypothesis for the Sigmodontinae. Revisión de la tribu Phyllotini (Rodentia: Sigmondontinae), con una hipótesis filogenética para los Sigmodontinae. Fieldiana Zool. 1464, 1-112 (1995).
Oryzomys_couesi	Steppan, S. Revision of the tribe Phyllotini (Rodentia: Sigmondontinae), with a phylogenetic hypothesis for the Sigmodontinae. Revisión de la tribu Phyllotini (Rodentia: Sigmondontinae), con una hipótesis filogenética para los Sigmodontinae. Fieldiana Zool. 1464, 1-112 (1995).
Oryzomys_palustris	Steppan, S. Revision of the tribe Phyllotini (Rodentia: Sigmondontinae), with a phylogenetic hypothesis for the Sigmodontinae. Revisión de la tribu Phyllotini (Rodentia: Sigmondontinae), con una hipótesis filogenética para los Sigmodontinae. Fieldiana Zool. 1464, 1-112 (1995).
Sigmodontomys_alfari	Steppan, S. Revision of the tribe Phyllotini (Rodentia: Sigmondontinae), with a phylogenetic hypothesis for the Sigmodontinae. Revisión de la tribu Phyllotini (Rodentia: Sigmondontinae), con una hipótesis filogenética para los Sigmodontinae. Fieldiana Zool. 1464, 1-112 (1995).
Melanomys_caliginosus	Steppan, S. Revision of the tribe Phyllotini (Rodentia: Sigmondontinae), with a phylogenetic hypothesis for the Sigmodontinae. Revisión de la tribu Phyllotini (Rodentia: Sigmondontinae), con una hipótesis filogenética para los Sigmodontinae. Fieldiana Zool. 1464, 1-112 (1995).
Nesoryzomys_indefessus	Steppan, S. Revision of the tribe Phyllotini (Rodentia: Sigmondontinae), with a phylogenetic hypothesis for the Sigmodontinae. Revisión de la tribu Phyllotini (Rodentia: Sigmondontinae), con una hipótesis filogenética para los Sigmodontinae. Fieldiana Zool. 1464, 1-112 (1995).
Irenomys_tarsalis	Steppan, S. Revision of the tribe Phyllotini (Rodentia: Sigmondontinae), with a phylogenetic hypothesis for the Sigmodontinae. Revisión de la tribu Phyllotini (Rodentia: Sigmondontinae), con una hipótesis filogenética para los Sigmodontinae. Fieldiana Zool. 1464, 1-112 (1995).
Euneomys_petersoni	Carrizo, L. V. & Catalano, S. A. First phylogenetic analysis of the tribe Phyllotini (Rodentia: Sigmodontinae) combining morphological and molecular data. Cladistics 31, 593-620 (2015).
Euneomys_chinchilloides	Steppan, S. Revision of the tribe Phyllotini (Rodentia: Sigmondontinae), with a phylogenetic hypothesis for the Sigmodontinae. Revisión de la tribu Phyllotini (Rodentia: Sigmondontinae), con una hipótesis filogenética para los Sigmodontinae. Fieldiana Zool. 1464, 1-112 (1995).
Andinomys_edax	Steppan, S. Revision of the tribe Phyllotini (Rodentia: Sigmondontinae), with a phylogenetic hypothesis for the Sigmodontinae. Revisión de la tribu Phyllotini (Rodentia: Sigmondontinae), con una hipótesis filogenética para los Sigmodontinae. Fieldiana Zool. 1464, 1-112 (1995).
Punomys_kofordi	Carrizo, L. V. & Catalano, S. A. First phylogenetic analysis of the tribe Phyllotini (Rodentia: Sigmodontinae) combining morphological and molecular data. Cladistics 31, 593-620 (2015).
Delomys_sublineatus	Steppan, S. Revision of the tribe Phyllotini (Rodentia: Sigmondontinae), with a phylogenetic hypothesis for the Sigmodontinae. Revisión de la tribu Phyllotini (Rodentia: Sigmondontinae), con una hipótesis filogenética para los Sigmodontinae. Fieldiana Zool. 1464, 1-112 (1995).
Delomys_dorsalis	Steppan, S. Revision of the tribe Phyllotini (Rodentia: Sigmondontinae), with a phylogenetic hypothesis for the Sigmodontinae. Revisión de la tribu Phyllotini (Rodentia: Sigmondontinae), con una hipótesis filogenética para los Sigmodontinae. Fieldiana Zool. 1464, 1-112 (1995).
Calomys_lepidus	Steppan, S. Revision of the tribe Phyllotini (Rodentia: Sigmondontinae), with a phylogenetic hypothesis for the Sigmodontinae. Revisión de la tribu Phyllotini (Rodentia: Sigmondontinae), con una hipótesis filogenética para los Sigmodontinae. Fieldiana Zool. 1464, 1-112 (1995).
Calomys_sorellus	Steppan, S. Revision of the tribe Phyllotini (Rodentia: Sigmondontinae), with a phylogenetic hypothesis for the Sigmodontinae. Revisión de la tribu Phyllotini (Rodentia: Sigmondontinae), con una hipótesis filogenética para los Sigmodontinae. Fieldiana Zool. 1464, 1-112 (1995).
Calomys_musculinus	Steppan, S. Revision of the tribe Phyllotini (Rodentia: Sigmondontinae), with a phylogenetic hypothesis for the Sigmodontinae. Revisión de la tribu Phyllotini (Rodentia: Sigmondontinae), con una hipótesis filogenética para los Sigmodontinae. Fieldiana Zool. 1464, 1-112 (1995).
Calomys_laucha	Steppan, S. Revision of the tribe Phyllotini (Rodentia: Sigmondontinae), with a phylogenetic hypothesis for the Sigmodontinae. Revisión de la tribu Phyllotini (Rodentia: Sigmondontinae), con una hipótesis filogenética para los Sigmodontinae. Fieldiana Zool. 1464, 1-112 (1995).
Calomys_tener	Steppan, S. Revision of the tribe Phyllotini (Rodentia: Sigmondontinae), with a phylogenetic hypothesis for the Sigmodontinae. Revisión de la tribu Phyllotini (Rodentia: Sigmondontinae), con una hipótesis filogenética para los Sigmodontinae. Fieldiana Zool. 1464, 1-112 (1995).
Calomys_boliviae	Steppan, S. Revision of the tribe Phyllotini (Rodentia: Sigmondontinae), with a phylogenetic hypothesis for the Sigmodontinae. Revisión de la tribu Phyllotini (Rodentia: Sigmondontinae), con una hipótesis filogenética para los Sigmodontinae. Fieldiana Zool. 1464, 1-112 (1995).
Calomys_callosus	Steppan, S. Revision of the tribe Phyllotini (Rodentia: Sigmondontinae), with a phylogenetic hypothesis for the Sigmodontinae. Revisión de la tribu Phyllotini (Rodentia: Sigmondontinae), con una hipótesis filogenética para los Sigmodontinae. Fieldiana Zool. 1464, 1-112 (1995).
Calomys_venustus	Steppan, S. Revision of the tribe Phyllotini (Rodentia: Sigmondontinae), with a phylogenetic hypothesis for the Sigmodontinae. Revisión de la tribu Phyllotini (Rodentia: Sigmondontinae), con una hipótesis filogenética para los Sigmodontinae. Fieldiana Zool. 1464, 1-112 (1995).
Calomys_hummelincki	Steppan, S. Revision of the tribe Phyllotini (Rodentia: Sigmondontinae), with a phylogenetic hypothesis for the Sigmodontinae. Revisión de la tribu Phyllotini (Rodentia: Sigmondontinae), con una hipótesis filogenética para los Sigmodontinae. Fieldiana Zool. 1464, 1-112 (1995).
Eligmodontia_morgani	Steppan, S. Revision of the tribe Phyllotini (Rodentia: Sigmondontinae), with a phylogenetic hypothesis for the Sigmodontinae. Revisión de la tribu Phyllotini (Rodentia: Sigmondontinae), con una hipótesis filogenética para los Sigmodontinae. Fieldiana Zool. 1464, 1-112 (1995).
Eligmodontia_puerulus	Steppan, S. Revision of the tribe Phyllotini (Rodentia: Sigmondontinae), with a phylogenetic hypothesis for the Sigmodontinae. Revisión de la tribu Phyllotini (Rodentia: Sigmondontinae), con una hipótesis filogenética para los Sigmodontinae. Fieldiana Zool. 1464, 1-112 (1995).
Eligmodontia_moreni	Carrizo, L. V. & Catalano, S. A. First phylogenetic analysis of the tribe Phyllotini (Rodentia: Sigmodontinae) combining morphological and molecular data. Cladistics 31, 593-620 (2015).
Eligmodontia_hirtipes	Carrizo, L. V. & Catalano, S. A. First phylogenetic analysis of the tribe Phyllotini (Rodentia: Sigmodontinae) combining morphological and molecular data. Cladistics 31, 593-620 (2015).
Eligmodontia_bolsonensis	Carrizo, L. V. & Catalano, S. A. First phylogenetic analysis of the tribe Phyllotini (Rodentia: Sigmodontinae) combining morphological and molecular data. Cladistics 31, 593-620 (2015).
Graomys_griseoflavus	Steppan, S. Revision of the tribe Phyllotini (Rodentia: Sigmondontinae), with a phylogenetic hypothesis for the Sigmodontinae. Revisión de la tribu Phyllotini (Rodentia: Sigmondontinae), con una hipótesis filogenética para los Sigmodontinae. Fieldiana Zool. 1464, 1-112 (1995).
Graomys_domorum	Steppan, S. Revision of the tribe Phyllotini (Rodentia: Sigmondontinae), with a phylogenetic hypothesis for the Sigmodontinae. Revisión de la tribu Phyllotini (Rodentia: Sigmondontinae), con una hipótesis filogenética para los Sigmodontinae. Fieldiana Zool. 1464, 1-112 (1995).
Andalgalomys_pearsoni	Steppan, S. Revision of the tribe Phyllotini (Rodentia: Sigmondontinae), with a phylogenetic hypothesis for the Sigmodontinae. Revisión de la tribu Phyllotini (Rodentia: Sigmondontinae), con una hipótesis filogenética para los Sigmodontinae. Fieldiana Zool. 1464, 1-112 (1995).
Andalgalomys_olrogi	Carrizo, L. V. & Catalano, S. A. First phylogenetic analysis of the tribe Phyllotini (Rodentia: Sigmodontinae) combining morphological and molecular data. Cladistics 31, 593-620 (2015).
Salinomys_delicatus	Carrizo, L. V. & Catalano, S. A. First phylogenetic analysis of the tribe Phyllotini (Rodentia: Sigmodontinae) combining morphological and molecular data. Cladistics 31, 593-620 (2015).
Phyllotis_wolffsohni	Steppan, S. Revision of the tribe Phyllotini (Rodentia: Sigmondontinae), with a phylogenetic hypothesis for the Sigmodontinae. Revisión de la tribu Phyllotini (Rodentia: Sigmondontinae), con una hipótesis filogenética para los Sigmodontinae. Fieldiana Zool. 1464, 1-112 (1995).
Tapecomys_primus	Carrizo, L. V. & Catalano, S. A. First phylogenetic analysis of the tribe Phyllotini (Rodentia: Sigmodontinae) combining morphological and molecular data. Cladistics 31, 593-620 (2015).
Auliscomys_sublimis	Steppan, S. Revision of the tribe Phyllotini (Rodentia: Sigmondontinae), with a phylogenetic hypothesis for the Sigmodontinae. Revisión de la tribu Phyllotini (Rodentia: Sigmondontinae), con una hipótesis filogenética para los Sigmodontinae. Fieldiana Zool. 1464, 1-112 (1995).
Auliscomys_pictus	Steppan, S. Revision of the tribe Phyllotini (Rodentia: Sigmondontinae), with a phylogenetic hypothesis for the Sigmodontinae. Revisión de la tribu Phyllotini (Rodentia: Sigmondontinae), con una hipótesis filogenética para los Sigmodontinae. Fieldiana Zool. 1464, 1-112 (1995).
Auliscomys_boliviensis	Steppan, S. Revision of the tribe Phyllotini (Rodentia: Sigmondontinae), with a phylogenetic hypothesis for the Sigmodontinae. Revisión de la tribu Phyllotini (Rodentia: Sigmondontinae), con una hipótesis filogenética para los Sigmodontinae. Fieldiana Zool. 1464, 1-112 (1995).
Galenomys_garleppi	Steppan, S. Revision of the tribe Phyllotini (Rodentia: Sigmondontinae), with a phylogenetic hypothesis for the Sigmodontinae. Revisión de la tribu Phyllotini (Rodentia: Sigmondontinae), con una hipótesis filogenética para los Sigmodontinae. Fieldiana Zool. 1464, 1-112 (1995).
Loxodontomys_micropus	Steppan, S. Revision of the tribe Phyllotini (Rodentia: Sigmondontinae), with a phylogenetic hypothesis for the Sigmodontinae. Revisión de la tribu Phyllotini (Rodentia: Sigmondontinae), con una hipótesis filogenética para los Sigmodontinae. Fieldiana Zool. 1464, 1-112 (1995).
Phyllotis_osilae	Steppan, S. Revision of the tribe Phyllotini (Rodentia: Sigmondontinae), with a phylogenetic hypothesis for the Sigmodontinae. Revisión de la tribu Phyllotini (Rodentia: Sigmondontinae), con una hipótesis filogenética para los Sigmodontinae. Fieldiana Zool. 1464, 1-112 (1995).
Phyllotis_alisosiensis	Carrizo, L. V. & Catalano, S. A. First phylogenetic analysis of the tribe Phyllotini (Rodentia: Sigmodontinae) combining morphological and molecular data. Cladistics 31, 593-620 (2015).
Phyllotis_anitae	Carrizo, L. V. & Catalano, S. A. First phylogenetic analysis of the tribe Phyllotini (Rodentia: Sigmodontinae) combining morphological and molecular data. Cladistics 31, 593-620 (2015).
Phyllotis_caprinus	Steppan, S. Revision of the tribe Phyllotini (Rodentia: Sigmondontinae), with a phylogenetic hypothesis for the Sigmodontinae. Revisión de la tribu Phyllotini (Rodentia: Sigmondontinae), con una hipótesis filogenética para los Sigmodontinae. Fieldiana Zool. 1464, 1-112 (1995).
Phyllotis_xanthopygus	Steppan, S. Revision of the tribe Phyllotini (Rodentia: Sigmondontinae), with a phylogenetic hypothesis for the Sigmodontinae. Revisión de la tribu Phyllotini (Rodentia: Sigmondontinae), con una hipótesis filogenética para los Sigmodontinae. Fieldiana Zool. 1464, 1-112 (1995).
Phyllotis_darwini	Steppan, S. Revision of the tribe Phyllotini (Rodentia: Sigmondontinae), with a phylogenetic hypothesis for the Sigmodontinae. Revisión de la tribu Phyllotini (Rodentia: Sigmondontinae), con una hipótesis filogenética para los Sigmodontinae. Fieldiana Zool. 1464, 1-112 (1995).
Phyllotis_amicus	Steppan, S. Revision of the tribe Phyllotini (Rodentia: Sigmondontinae), with a phylogenetic hypothesis for the Sigmodontinae. Revisión de la tribu Phyllotini (Rodentia: Sigmondontinae), con una hipótesis filogenética para los Sigmodontinae. Fieldiana Zool. 1464, 1-112 (1995).
Paralomys_gerbillus	Steppan, S. Revision of the tribe Phyllotini (Rodentia: Sigmondontinae), with a phylogenetic hypothesis for the Sigmodontinae. Revisión de la tribu Phyllotini (Rodentia: Sigmondontinae), con una hipótesis filogenética para los Sigmodontinae. Fieldiana Zool. 1464, 1-112 (1995).
Phyllotis_haggardi	Steppan, S. Revision of the tribe Phyllotini (Rodentia: Sigmondontinae), with a phylogenetic hypothesis for the Sigmodontinae. Revisión de la tribu Phyllotini (Rodentia: Sigmondontinae), con una hipótesis filogenética para los Sigmodontinae. Fieldiana Zool. 1464, 1-112 (1995).
Phyllotis_andium	Steppan, S. Revision of the tribe Phyllotini (Rodentia: Sigmondontinae), with a phylogenetic hypothesis for the Sigmodontinae. Revisión de la tribu Phyllotini (Rodentia: Sigmondontinae), con una hipótesis filogenética para los Sigmodontinae. Fieldiana Zool. 1464, 1-112 (1995).
Calassomys_apicalis	Pardiñas, U. F., Lessa, G., Teta, P., Salazar-Bravo, J. & Câmara, E. M.. A new genus of sigmodontine rodent from eastern Brazil and the origin of the tribe Phyllotini. J. Mammal. 95, 201-215 (2014).
Akodon_neocenus	Steppan, S. Revision of the tribe Phyllotini (Rodentia: Sigmondontinae), with a phylogenetic hypothesis for the Sigmodontinae. Revisión de la tribu Phyllotini (Rodentia: Sigmondontinae), con una hipótesis filogenética para los Sigmodontinae. Fieldiana Zool. 1464, 1-112 (1995).
Wiedomys_pyrrhorhinos	Steppan, S. Revision of the tribe Phyllotini (Rodentia: Sigmondontinae), with a phylogenetic hypothesis for the Sigmodontinae. Revisión de la tribu Phyllotini (Rodentia: Sigmondontinae), con una hipótesis filogenética para los Sigmodontinae. Fieldiana Zool. 1464, 1-112 (1995).
Juliomys_pictipes	Carrizo, L. V. & Catalano, S. A. First phylogenetic analysis of the tribe Phyllotini (Rodentia: Sigmodontinae) combining morphological and molecular data. Cladistics 31, 593-620 (2015).
Abrothrix_olivaceus	Steppan, S. Revision of the tribe Phyllotini (Rodentia: Sigmondontinae), with a phylogenetic hypothesis for the Sigmodontinae. Revisión de la tribu Phyllotini (Rodentia: Sigmondontinae), con una hipótesis filogenética para los Sigmodontinae. Fieldiana Zool. 1464, 1-112 (1995).
Abrothrix_andinus	Steppan, S. Revision of the tribe Phyllotini (Rodentia: Sigmondontinae), with a phylogenetic hypothesis for the Sigmodontinae. Revisión de la tribu Phyllotini (Rodentia: Sigmondontinae), con una hipótesis filogenética para los Sigmodontinae. Fieldiana Zool. 1464, 1-112 (1995).
Abrothrix_jelskii	Steppan, S. Revision of the tribe Phyllotini (Rodentia: Sigmondontinae), with a phylogenetic hypothesis for the Sigmodontinae. Revisión de la tribu Phyllotini (Rodentia: Sigmondontinae), con una hipótesis filogenética para los Sigmodontinae. Fieldiana Zool. 1464, 1-112 (1995).
Abrothrix_illuteus	Carrizo, L. V. & Catalano, S. A. First phylogenetic analysis of the tribe Phyllotini (Rodentia: Sigmodontinae) combining morphological and molecular data. Cladistics 31, 593-620 (2015).
Abrothrix_longipilis	Steppan, S. Revision of the tribe Phyllotini (Rodentia: Sigmondontinae), with a phylogenetic hypothesis for the Sigmodontinae. Revisión de la tribu Phyllotini (Rodentia: Sigmondontinae), con una hipótesis filogenética para los Sigmodontinae. Fieldiana Zool. 1464, 1-112 (1995).
Abrothrix_sanborni	Steppan, S. Revision of the tribe Phyllotini (Rodentia: Sigmondontinae), with a phylogenetic hypothesis for the Sigmodontinae. Revisión de la tribu Phyllotini (Rodentia: Sigmondontinae), con una hipótesis filogenética para los Sigmodontinae. Fieldiana Zool. 1464, 1-112 (1995).
Notiomys_edwardsii	Steppan, S. Revision of the tribe Phyllotini (Rodentia: Sigmondontinae), with a phylogenetic hypothesis for the Sigmodontinae. Revisión de la tribu Phyllotini (Rodentia: Sigmondontinae), con una hipótesis filogenética para los Sigmodontinae. Fieldiana Zool. 1464, 1-112 (1995).
Geoxus_valdivianus	Steppan, S. Revision of the tribe Phyllotini (Rodentia: Sigmondontinae), with a phylogenetic hypothesis for the Sigmodontinae. Revisión de la tribu Phyllotini (Rodentia: Sigmondontinae), con una hipótesis filogenética para los Sigmodontinae. Fieldiana Zool. 1464, 1-112 (1995).
Chelemys_macronyx	Steppan, S. Revision of the tribe Phyllotini (Rodentia: Sigmondontinae), with a phylogenetic hypothesis for the Sigmodontinae. Revisión de la tribu Phyllotini (Rodentia: Sigmondontinae), con una hipótesis filogenética para los Sigmodontinae. Fieldiana Zool. 1464, 1-112 (1995).
Mystromys_albicaudatus	Steppan, S. Revision of the tribe Phyllotini (Rodentia: Sigmondontinae), with a phylogenetic hypothesis for the Sigmodontinae. Revisión de la tribu Phyllotini (Rodentia: Sigmondontinae), con una hipótesis filogenética para los Sigmodontinae. Fieldiana Zool. 1464, 1-112 (1995).
Saccostomus_campestris	Steppan, S. Revision of the tribe Phyllotini (Rodentia: Sigmondontinae), with a phylogenetic hypothesis for the Sigmodontinae. Revisión de la tribu Phyllotini (Rodentia: Sigmondontinae), con una hipótesis filogenética para los Sigmodontinae. Fieldiana Zool. 1464, 1-112 (1995).
Beamys_hindei	Steppan, S. Revision of the tribe Phyllotini (Rodentia: Sigmondontinae), with a phylogenetic hypothesis for the Sigmodontinae. Revisión de la tribu Phyllotini (Rodentia: Sigmondontinae), con una hipótesis filogenética para los Sigmodontinae. Fieldiana Zool. 1464, 1-112 (1995).
Cricetomys_gambianus	Olude, M. A., Mustapha, O. A., Ogunbunmi, T. K. & Olopade, J. O. The vertebral column, ribs, and sternum of the African giant rat (Cricetomys gambianus waterhouse). The scientific world journal, 2013.
Brachytarsomys_albicauda	Steppan, S. Revision of the tribe Phyllotini (Rodentia: Sigmondontinae), with a phylogenetic hypothesis for the Sigmodontinae. Revisión de la tribu Phyllotini (Rodentia: Sigmondontinae), con una hipótesis filogenética para los Sigmodontinae. Fieldiana Zool. 1464, 1-112 (1995).
Gymnuromys_roberti	Steppan, S. Revision of the tribe Phyllotini (Rodentia: Sigmondontinae), with a phylogenetic hypothesis for the Sigmodontinae. Revisión de la tribu Phyllotini (Rodentia: Sigmondontinae), con una hipótesis filogenética para los Sigmodontinae. Fieldiana Zool. 1464, 1-112 (1995).
Eliurus_myoxinus	Steppan, S. Revision of the tribe Phyllotini (Rodentia: Sigmondontinae), with a phylogenetic hypothesis for the Sigmodontinae. Revisión de la tribu Phyllotini (Rodentia: Sigmondontinae), con una hipótesis filogenética para los Sigmodontinae. Fieldiana Zool. 1464, 1-112 (1995).
Brachyuromys_ramirohitra	Steppan, S. Revision of the tribe Phyllotini (Rodentia: Sigmondontinae), with a phylogenetic hypothesis for the Sigmodontinae. Revisión de la tribu Phyllotini (Rodentia: Sigmondontinae), con una hipótesis filogenética para los Sigmodontinae. Fieldiana Zool. 1464, 1-112 (1995).
Nesomys_rufus	Steppan, S. Revision of the tribe Phyllotini (Rodentia: Sigmondontinae), with a phylogenetic hypothesis for the Sigmodontinae. Revisión de la tribu Phyllotini (Rodentia: Sigmondontinae), con una hipótesis filogenética para los Sigmodontinae. Fieldiana Zool. 1464, 1-112 (1995).
Nesomys_audeberti	Steppan, S. Revision of the tribe Phyllotini (Rodentia: Sigmondontinae), with a phylogenetic hypothesis for the Sigmodontinae. Revisión de la tribu Phyllotini (Rodentia: Sigmondontinae), con una hipótesis filogenética para los Sigmodontinae. Fieldiana Zool. 1464, 1-112 (1995).
Macrotarsomys_bastardi	Steppan, S. Revision of the tribe Phyllotini (Rodentia: Sigmondontinae), with a phylogenetic hypothesis for the Sigmodontinae. Revisión de la tribu Phyllotini (Rodentia: Sigmondontinae), con una hipótesis filogenética para los Sigmodontinae. Fieldiana Zool. 1464, 1-112 (1995).
Calomyscus_baluchi	Steppan, S. Revision of the tribe Phyllotini (Rodentia: Sigmondontinae), with a phylogenetic hypothesis for the Sigmodontinae. Revisión de la tribu Phyllotini (Rodentia: Sigmondontinae), con una hipótesis filogenética para los Sigmodontinae. Fieldiana Zool. 1464, 1-112 (1995).
Lophiomys_imhausi	Kingdon, J. Mammals of Africa: Volume III: Rodents, Hares and Rabbits (A&C Black, 2014).
Pachyuromys_duprasi	Carleton, M. D. Phylogenetic relationships in neotomine-peromyscine rodents (Muroidea) and a reappraisal of the dichotomy within New World Cricetinae. Misc. Publ. Mus. Zool. Univ. Mich. 157, 1-146 (1980).
Psammomys_obesus	Carleton, M. D. Phylogenetic relationships in neotomine-peromyscine rodents (Muroidea) and a reappraisal of the dichotomy within New World Cricetinae. Misc. Publ. Mus. Zool. Univ. Mich. 157, 1-146 (1980).
Meriones_shawi	Carleton, M. D. Phylogenetic relationships in neotomine-peromyscine rodents (Muroidea) and a reappraisal of the dichotomy within New World Cricetinae. Misc. Publ. Mus. Zool. Univ. Mich. 157, 1-146 (1980).
Meriones_unguiculatus	Hautier, L., Weisbecker, V., Sánchez-Villagra, M. R., Goswami, A. & Asher, R. J. Skeletal development in sloths and the evolution of mammalian vertebral patterning. Proc. Natl. Acad. Sci. USA 107, 18903–18908 (2010).
Sekeetamys_calurus	Carleton, M. D. Phylogenetic relationships in neotomine-peromyscine rodents (Muroidea) and a reappraisal of the dichotomy within New World Cricetinae. Misc. Publ. Mus. Zool. Univ. Mich. 157, 1-146 (1980).
Ammodillus_imbellis	Carleton, M. D. Phylogenetic relationships in neotomine-peromyscine rodents (Muroidea) and a reappraisal of the dichotomy within New World Cricetinae. Misc. Publ. Mus. Zool. Univ. Mich. 157, 1-146 (1980).
Microdillus_peeli	Carleton, M. D. Phylogenetic relationships in neotomine-peromyscine rodents (Muroidea) and a reappraisal of the dichotomy within New World Cricetinae. Misc. Publ. Mus. Zool. Univ. Mich. 157, 1-146 (1980).
Gerbillus_cheesmani	Carleton, M. D. Phylogenetic relationships in neotomine-peromyscine rodents (Muroidea) and a reappraisal of the dichotomy within New World Cricetinae. Misc. Publ. Mus. Zool. Univ. Mich. 157, 1-146 (1980).
Taterillus_arenarius	Carleton, M. D. Phylogenetic relationships in neotomine-peromyscine rodents (Muroidea) and a reappraisal of the dichotomy within New World Cricetinae. Misc. Publ. Mus. Zool. Univ. Mich. 157, 1-146 (1980).
Gerbilliscus_nigricaudus	Carleton, M. D. Phylogenetic relationships in neotomine-peromyscine rodents (Muroidea) and a reappraisal of the dichotomy within New World Cricetinae. Misc. Publ. Mus. Zool. Univ. Mich. 157, 1-146 (1980).
Gerbillurus_setzeri	Carleton, M. D. Phylogenetic relationships in neotomine-peromyscine rodents (Muroidea) and a reappraisal of the dichotomy within New World Cricetinae. Misc. Publ. Mus. Zool. Univ. Mich. 157, 1-146 (1980).
Desmodillus_auricularis	Carleton, M. D. Phylogenetic relationships in neotomine-peromyscine rodents (Muroidea) and a reappraisal of the dichotomy within New World Cricetinae. Misc. Publ. Mus. Zool. Univ. Mich. 157, 1-146 (1980).
Tatera_indica	Carleton, M. D. Phylogenetic relationships in neotomine-peromyscine rodents (Muroidea) and a reappraisal of the dichotomy within New World Cricetinae. Misc. Publ. Mus. Zool. Univ. Mich. 157, 1-146 (1980).
Notomys_amplus	Williams, S. A., Spear, J. K., Petrullo, L., Goldstein, D. M., Lee, A. B., Peterson, A. L., Miano, D. A., Kaczmarek, E. B. & Shattuck, M. R. Increased variation in numbers of presacral vertebrae in suspensory mammals. Nat. Ecol. Evol. 3, 949–956 (2019).
Conilurus_albipes	Narita, Y. & Kuratani, S. Evolution of the vertebral formulae in mammals: a perspective on developmental constraints. J. Exper. Zool. B: Mol. Dev. Evol. 304, 91–106 (2005).
Hydromys_chrysogaster	Narita, Y. & Kuratani, S. Evolution of the vertebral formulae in mammals: a perspective on developmental constraints. J. Exper. Zool. B: Mol. Dev. Evol. 304, 91–106 (2005).
Mastomys_coucha	Williams, S. A., Spear, J. K., Petrullo, L., Goldstein, D. M., Lee, A. B., Peterson, A. L., Miano, D. A., Kaczmarek, E. B. & Shattuck, M. R. Increased variation in numbers of presacral vertebrae in suspensory mammals. Nat. Ecol. Evol. 3, 949–956 (2019).
Mus_musculus	Asher, R. J., Lin, K. H., Kardjilov, N. & Hautier, L. Variability and constraint in the mammalian vertebral column. J. Evol. Biol. 24, 1080-1090 (2011).
Rhabdomys_pumilio	Asher, R. J., Lin, K. H., Kardjilov, N. & Hautier, L. Variability and constraint in the mammalian vertebral column. J. Evol. Biol. 24, 1080-1090 (2011).
Micromys_minutus	Williams, S. A., Spear, J. K., Petrullo, L., Goldstein, D. M., Lee, A. B., Peterson, A. L., Miano, D. A., Kaczmarek, E. B. & Shattuck, M. R. Increased variation in numbers of presacral vertebrae in suspensory mammals. Nat. Ecol. Evol. 3, 949–956 (2019).
Maxomys_inflatus	Williams, S. A., Spear, J. K., Petrullo, L., Goldstein, D. M., Lee, A. B., Peterson, A. L., Miano, D. A., Kaczmarek, E. B. & Shattuck, M. R. Increased variation in numbers of presacral vertebrae in suspensory mammals. Nat. Ecol. Evol. 3, 949–956 (2019).
Rattus_rattus	Williams, S. A., Spear, J. K., Petrullo, L., Goldstein, D. M., Lee, A. B., Peterson, A. L., Miano, D. A., Kaczmarek, E. B. & Shattuck, M. R. Increased variation in numbers of presacral vertebrae in suspensory mammals. Nat. Ecol. Evol. 3, 949–956 (2019).
Rattus_fuscipes	Narita, Y. & Kuratani, S. Evolution of the vertebral formulae in mammals: a perspective on developmental constraints. J. Exper. Zool. B: Mol. Dev. Evol. 304, 91–106 (2005).
Rattus_norvegicus	Williams, S. A., Spear, J. K., Petrullo, L., Goldstein, D. M., Lee, A. B., Peterson, A. L., Miano, D. A., Kaczmarek, E. B. & Shattuck, M. R. Increased variation in numbers of presacral vertebrae in suspensory mammals. Nat. Ecol. Evol. 3, 949–956 (2019).
Pedetes_surdaster	Hatt, R. T. The vertebral columns of ricochetal rodents. Bull. Amer. Mus. Nat. Hist. 63, 599-708.
Pedetes_capensis	Hatt, R. T. The vertebral columns of ricochetal rodents. Bull. Amer. Mus. Nat. Hist. 63, 599-708.
Anomalurus_pelii	Williams, S. A., Spear, J. K., Petrullo, L., Goldstein, D. M., Lee, A. B., Peterson, A. L., Miano, D. A., Kaczmarek, E. B. & Shattuck, M. R. Increased variation in numbers of presacral vertebrae in suspensory mammals. Nat. Ecol. Evol. 3, 949–956 (2019).
Anomalurus_derbianus	Williams, S. A., Spear, J. K., Petrullo, L., Goldstein, D. M., Lee, A. B., Peterson, A. L., Miano, D. A., Kaczmarek, E. B. & Shattuck, M. R. Increased variation in numbers of presacral vertebrae in suspensory mammals. Nat. Ecol. Evol. 3, 949–956 (2019).
Anomalurus_beecrofti	Kawashima, T., Thorington Jr, R. W., Bohaska, P. W. & Sato, F. Variability and constraint of vertebral formulae and proportions in colugos, tree shrews, and rodents, with special reference to vertebral modification by aerodynamic adaptation. Folia Morphol. 77, 44-56 (2018).
Anomalurus_pusillus	Kawashima, T., Thorington Jr, R. W., Bohaska, P. W. & Sato, F. Variability and constraint of vertebral formulae and proportions in colugos, tree shrews, and rodents, with special reference to vertebral modification by aerodynamic adaptation. Folia Morphol. 77, 44-56 (2018).
Microdipodops_pallidus	Williams, S. A., Spear, J. K., Petrullo, L., Goldstein, D. M., Lee, A. B., Peterson, A. L., Miano, D. A., Kaczmarek, E. B. & Shattuck, M. R. Increased variation in numbers of presacral vertebrae in suspensory mammals. Nat. Ecol. Evol. 3, 949–956 (2019).
Dipodomys_spectabilis	Williams, S. A., Spear, J. K., Petrullo, L., Goldstein, D. M., Lee, A. B., Peterson, A. L., Miano, D. A., Kaczmarek, E. B. & Shattuck, M. R. Increased variation in numbers of presacral vertebrae in suspensory mammals. Nat. Ecol. Evol. 3, 949–956 (2019).
Dipodomys_ordii	Williams, S. A., Spear, J. K., Petrullo, L., Goldstein, D. M., Lee, A. B., Peterson, A. L., Miano, D. A., Kaczmarek, E. B. & Shattuck, M. R. Increased variation in numbers of presacral vertebrae in suspensory mammals. Nat. Ecol. Evol. 3, 949–956 (2019).
Dipodomys_heermanni	Williams, S. A., Spear, J. K., Petrullo, L., Goldstein, D. M., Lee, A. B., Peterson, A. L., Miano, D. A., Kaczmarek, E. B. & Shattuck, M. R. Increased variation in numbers of presacral vertebrae in suspensory mammals. Nat. Ecol. Evol. 3, 949–956 (2019).
Dipodomys_merriami	Williams, S. A., Spear, J. K., Petrullo, L., Goldstein, D. M., Lee, A. B., Peterson, A. L., Miano, D. A., Kaczmarek, E. B. & Shattuck, M. R. Increased variation in numbers of presacral vertebrae in suspensory mammals. Nat. Ecol. Evol. 3, 949–956 (2019).
Thomomys_bulbivorus	Williams, S. A., Spear, J. K., Petrullo, L., Goldstein, D. M., Lee, A. B., Peterson, A. L., Miano, D. A., Kaczmarek, E. B. & Shattuck, M. R. Increased variation in numbers of presacral vertebrae in suspensory mammals. Nat. Ecol. Evol. 3, 949–956 (2019).
Thomomys_umbrinus	Williams, S. A., Spear, J. K., Petrullo, L., Goldstein, D. M., Lee, A. B., Peterson, A. L., Miano, D. A., Kaczmarek, E. B. & Shattuck, M. R. Increased variation in numbers of presacral vertebrae in suspensory mammals. Nat. Ecol. Evol. 3, 949–956 (2019).
Thomomys_bottae	Williams, S. A., Spear, J. K., Petrullo, L., Goldstein, D. M., Lee, A. B., Peterson, A. L., Miano, D. A., Kaczmarek, E. B. & Shattuck, M. R. Increased variation in numbers of presacral vertebrae in suspensory mammals. Nat. Ecol. Evol. 3, 949–956 (2019).
Geomys_pinetis	Williams, S. A., Spear, J. K., Petrullo, L., Goldstein, D. M., Lee, A. B., Peterson, A. L., Miano, D. A., Kaczmarek, E. B. & Shattuck, M. R. Increased variation in numbers of presacral vertebrae in suspensory mammals. Nat. Ecol. Evol. 3, 949–956 (2019).
Geomys_bursarius	Williams, S. A., Spear, J. K., Petrullo, L., Goldstein, D. M., Lee, A. B., Peterson, A. L., Miano, D. A., Kaczmarek, E. B. & Shattuck, M. R. Increased variation in numbers of presacral vertebrae in suspensory mammals. Nat. Ecol. Evol. 3, 949–956 (2019).
Geomys_arenarius	Kawashima, T., Thorington Jr, R. W., Bohaska, P. W. & Sato, F. Variability and constraint of vertebral formulae and proportions in colugos, tree shrews, and rodents, with special reference to vertebral modification by aerodynamic adaptation. Folia Morphol. 77, 44-56 (2018).
Cratogeomys_castanops	Williams, S. A., Spear, J. K., Petrullo, L., Goldstein, D. M., Lee, A. B., Peterson, A. L., Miano, D. A., Kaczmarek, E. B. & Shattuck, M. R. Increased variation in numbers of presacral vertebrae in suspensory mammals. Nat. Ecol. Evol. 3, 949–956 (2019).
Liomys_salvini	Hatt, R. T. The vertebral columns of ricochetal rodents. Bull. Amer. Mus. Nat. Hist. 63, 599-708.
Heteromys_anomalus	Hatt, R. T. The vertebral columns of ricochetal rodents. Bull. Amer. Mus. Nat. Hist. 63, 599-708.
Perognathus_fasciatus	Hatt, R. T. The vertebral columns of ricochetal rodents. Bull. Amer. Mus. Nat. Hist. 63, 599-708.
Castor_fiber	Williams, S. A., Spear, J. K., Petrullo, L., Goldstein, D. M., Lee, A. B., Peterson, A. L., Miano, D. A., Kaczmarek, E. B. & Shattuck, M. R. Increased variation in numbers of presacral vertebrae in suspensory mammals. Nat. Ecol. Evol. 3, 949–956 (2019).
Castor_canadensis	Owen, R. Descriptive catalogue of the osteological series contained in the museum of the Royal College of Surgeons of England. Vol. 2 (Taylor and Francis, 1853).
Hydrodamalis_gigas	Wursig, B. & Perrin, W. F. (Eds.). Encyclopedia of marine mammals (Academic Press, 2009).
Trichechus_manatus	Williams, S. A., Spear, J. K., Petrullo, L., Goldstein, D. M., Lee, A. B., Peterson, A. L., Miano, D. A., Kaczmarek, E. B. & Shattuck, M. R. Increased variation in numbers of presacral vertebrae in suspensory mammals. Nat. Ecol. Evol. 3, 949–956 (2019).
Trichechus_senegalensis	Wursig, B. & Perrin, W. F. (Eds.). Encyclopedia of marine mammals (Academic Press, 2009).
Trichechus_inunguis	Wursig, B. & Perrin, W. F. (Eds.). Encyclopedia of marine mammals (Academic Press, 2009).
Dugong_dugon	Sánchez‐Villagra, M. R., Narita, Y. & Kuratani, S. Thoracolumbar vertebral number: the first skeletal synapomorphy for afrotherian mammals. Syst. Biodiv. 5, 1–7 (2007).
Loxodonta_africana	Hautier, L., Weisbecker, V., Sánchez-Villagra, M. R., Goswami, A. & Asher, R. J. Skeletal development in sloths and the evolution of mammalian vertebral patterning. Proc. Natl. Acad. Sci. USA 107, 18903–18908 (2010).
Elephas_maximus	Shoshani, J., & Eisenberg, J. F. (1982). Elephas maximus. Mamm. Spec. 182, 1-8 (1982).
Procavia_capensis	Asher, R. J., Lin, K. H., Kardjilov, N. & Hautier, L. Variability and constraint in the mammalian vertebral column. J. Evol. Biol. 24, 1080-1090 (2011).
Heterohyrax_brucei	Buchholtz, E. A., Bailin, H. G., Laves, S. A., Yang, J. T., Chan, M. Y. & Drozd, L. E. Fixed cervical count and the origin of the mammalian diaphragm. Evol. Dev. 14, 399-411 (2012).
Dendrohyrax_validus	Sánchez‐Villagra, M. R., Narita, Y. & Kuratani, S. Thoracolumbar vertebral number: the first skeletal synapomorphy for afrotherian mammals. Syst. Biodiv. 5, 1–7 (2007).
Dendrohyrax_dorsalis	Asher, R. J., Lin, K. H., Kardjilov, N. & Hautier, L. Variability and constraint in the mammalian vertebral column. J. Evol. Biol. 24, 1080-1090 (2011).
Dendrohyrax_arboreus	Asher, R. J., Lin, K. H., Kardjilov, N. & Hautier, L. Variability and constraint in the mammalian vertebral column. J. Evol. Biol. 24, 1080-1090 (2011).
Orycteropus_afer	Williams, S. A., Spear, J. K., Petrullo, L., Goldstein, D. M., Lee, A. B., Peterson, A. L., Miano, D. A., Kaczmarek, E. B. & Shattuck, M. R. Increased variation in numbers of presacral vertebrae in suspensory mammals. Nat. Ecol. Evol. 3, 949–956 (2019).
Rhynchocyon_cirnei	Sánchez‐Villagra, M. R., Narita, Y. & Kuratani, S. Thoracolumbar vertebral number: the first skeletal synapomorphy for afrotherian mammals. Syst. Biodiv. 5, 1–7 (2007).
Rhynchocyon_chrysopygus	Rathbun, G. B. Rhynchocyon chrysopygus. Mamm. Spec. 117, 1-4 (1979).
Rhynchocyon_petersi	Rathbun, G. B. Rhynchocyon chrysopygus. Mamm. Spec. 117, 1-4 (1979).
Elephantulus_myurus	Sánchez‐Villagra, M. R., Narita, Y. & Kuratani, S. Thoracolumbar vertebral number: the first skeletal synapomorphy for afrotherian mammals. Syst. Biodiv. 5, 1–7 (2007).
Elephantulus_edwardii	Sánchez‐Villagra, M. R., Narita, Y. & Kuratani, S. Thoracolumbar vertebral number: the first skeletal synapomorphy for afrotherian mammals. Syst. Biodiv. 5, 1–7 (2007).
Macroscelides_proboscideus	Asher, R. J., Lin, K. H., Kardjilov, N. & Hautier, L. Variability and constraint in the mammalian vertebral column. J. Evol. Biol. 24, 1080-1090 (2011).
Petrodromus_tetradactylus	Williams, S. A., Spear, J. K., Petrullo, L., Goldstein, D. M., Lee, A. B., Peterson, A. L., Miano, D. A., Kaczmarek, E. B. & Shattuck, M. R. Increased variation in numbers of presacral vertebrae in suspensory mammals. Nat. Ecol. Evol. 3, 949–956 (2019).
Elephantulus_rufescens	Williams, S. A., Spear, J. K., Petrullo, L., Goldstein, D. M., Lee, A. B., Peterson, A. L., Miano, D. A., Kaczmarek, E. B. & Shattuck, M. R. Increased variation in numbers of presacral vertebrae in suspensory mammals. Nat. Ecol. Evol. 3, 949–956 (2019).
Elephantulus_brachyrhynchus	Williams, S. A., Spear, J. K., Petrullo, L., Goldstein, D. M., Lee, A. B., Peterson, A. L., Miano, D. A., Kaczmarek, E. B. & Shattuck, M. R. Increased variation in numbers of presacral vertebrae in suspensory mammals. Nat. Ecol. Evol. 3, 949–956 (2019).
Elephantulus_intufi	Sánchez‐Villagra, M. R., Narita, Y. & Kuratani, S. Thoracolumbar vertebral number: the first skeletal synapomorphy for afrotherian mammals. Syst. Biodiv. 5, 1–7 (2007).
Elephantulus_rupestris	Williams, S. A., Spear, J. K., Petrullo, L., Goldstein, D. M., Lee, A. B., Peterson, A. L., Miano, D. A., Kaczmarek, E. B. & Shattuck, M. R. Increased variation in numbers of presacral vertebrae in suspensory mammals. Nat. Ecol. Evol. 3, 949–956 (2019).
Potamogale_velox	Sánchez‐Villagra, M. R., Narita, Y. & Kuratani, S. Thoracolumbar vertebral number: the first skeletal synapomorphy for afrotherian mammals. Syst. Biodiv. 5, 1–7 (2007).
Limnogale_mergulus	Sánchez‐Villagra, M. R., Narita, Y. & Kuratani, S. Thoracolumbar vertebral number: the first skeletal synapomorphy for afrotherian mammals. Syst. Biodiv. 5, 1–7 (2007).
Microgale_talazaci	Sánchez‐Villagra, M. R., Narita, Y. & Kuratani, S. Thoracolumbar vertebral number: the first skeletal synapomorphy for afrotherian mammals. Syst. Biodiv. 5, 1–7 (2007).
Microgale_longicaudata	Sánchez‐Villagra, M. R., Narita, Y. & Kuratani, S. Thoracolumbar vertebral number: the first skeletal synapomorphy for afrotherian mammals. Syst. Biodiv. 5, 1–7 (2007).
Microgale_cowani	Sánchez‐Villagra, M. R., Narita, Y. & Kuratani, S. Thoracolumbar vertebral number: the first skeletal synapomorphy for afrotherian mammals. Syst. Biodiv. 5, 1–7 (2007).
Oryzorictes_tetradactylus	Sánchez‐Villagra, M. R., Narita, Y. & Kuratani, S. Thoracolumbar vertebral number: the first skeletal synapomorphy for afrotherian mammals. Syst. Biodiv. 5, 1–7 (2007).
Tenrec_ecaudatus	Asher, R. J., Lin, K. H., Kardjilov, N. & Hautier, L. Variability and constraint in the mammalian vertebral column. J. Evol. Biol. 24, 1080-1090 (2011).
Hemicentetes_semispinosus	Sánchez‐Villagra, M. R., Narita, Y. & Kuratani, S. Thoracolumbar vertebral number: the first skeletal synapomorphy for afrotherian mammals. Syst. Biodiv. 5, 1–7 (2007).
Setifer_setosus	Asher, R. J., Lin, K. H., Kardjilov, N. & Hautier, L. Variability and constraint in the mammalian vertebral column. J. Evol. Biol. 24, 1080-1090 (2011).
Echinops_telfairi	Werneburg, I., Tzika, A. C., Hautier, L., Asher, R. J., Milinkovitch, M. C. & Sánchez‐Villagra, M. R. Development and embryonic staging in non‐model organisms: the case of an afrotherian mammal. J. Anat. 222, 2-18 (2013).
Eremitalpa_granti	Williams, S. A., Spear, J. K., Petrullo, L., Goldstein, D. M., Lee, A. B., Peterson, A. L., Miano, D. A., Kaczmarek, E. B. & Shattuck, M. R. Increased variation in numbers of presacral vertebrae in suspensory mammals. Nat. Ecol. Evol. 3, 949–956 (2019).
Amblysomus_hottentotus	Asher, R. J., Lin, K. H., Kardjilov, N. & Hautier, L. Variability and constraint in the mammalian vertebral column. J. Evol. Biol. 24, 1080-1090 (2011).
Calcochloris_obtusirostris	Sánchez‐Villagra, M. R., Narita, Y. & Kuratani, S. Thoracolumbar vertebral number: the first skeletal synapomorphy for afrotherian mammals. Syst. Biodiv. 5, 1–7 (2007).
Chrysospalax_trevelyani	Sánchez‐Villagra, M. R., Narita, Y. & Kuratani, S. Thoracolumbar vertebral number: the first skeletal synapomorphy for afrotherian mammals. Syst. Biodiv. 5, 1–7 (2007).
Chrysochloris_asiatica	Sánchez‐Villagra, M. R., Narita, Y. & Kuratani, S. Thoracolumbar vertebral number: the first skeletal synapomorphy for afrotherian mammals. Syst. Biodiv. 5, 1–7 (2007).
Dasypus_hybridus	Williams, S. A., Spear, J. K., Petrullo, L., Goldstein, D. M., Lee, A. B., Peterson, A. L., Miano, D. A., Kaczmarek, E. B. & Shattuck, M. R. Increased variation in numbers of presacral vertebrae in suspensory mammals. Nat. Ecol. Evol. 3, 949–956 (2019).
Dasypus_novemcinctus	Hautier, L., Weisbecker, V., Sánchez-Villagra, M. R., Goswami, A. & Asher, R. J. Skeletal development in sloths and the evolution of mammalian vertebral patterning. Proc. Natl. Acad. Sci. USA 107, 18903–18908 (2010).
Dasypus_kappleri	Galliari, F. C., Carlini, A. A. & Sánchez-Villagra, M. R. (2010). Evolution of the axial skeleton in armadillos (Mammalia, Dasypodidae). Mamm. Biol. 75, 326-333 (2010).
Dasypus_septemcinctus	Galliari, F. C., Carlini, A. A. & Sánchez-Villagra, M. R. (2010). Evolution of the axial skeleton in armadillos (Mammalia, Dasypodidae). Mamm. Biol. 75, 326-333 (2010).
Zaedyus_pichiy	Sánchez‐Villagra, M. R., Narita, Y. & Kuratani, S. Thoracolumbar vertebral number: the first skeletal synapomorphy for afrotherian mammals. Syst. Biodiv. 5, 1–7 (2007).
Euphractus_sexcinctus	Williams, S. A., Spear, J. K., Petrullo, L., Goldstein, D. M., Lee, A. B., Peterson, A. L., Miano, D. A., Kaczmarek, E. B. & Shattuck, M. R. Increased variation in numbers of presacral vertebrae in suspensory mammals. Nat. Ecol. Evol. 3, 949–956 (2019).
Chaetophractus_vellerosus	Galliari, F. C., Carlini, A. A. & Sánchez-Villagra, M. R. (2010). Evolution of the axial skeleton in armadillos (Mammalia, Dasypodidae). Mamm. Biol. 75, 326-333 (2010).
Chaetophractus_villosus	Galliari, F. C., Carlini, A. A. & Sánchez-Villagra, M. R. (2010). Evolution of the axial skeleton in armadillos (Mammalia, Dasypodidae). Mamm. Biol. 75, 326-333 (2010).
Chlamyphorus_truncatus	Galliari, F. C., Carlini, A. A. & Sánchez-Villagra, M. R. (2010). Evolution of the axial skeleton in armadillos (Mammalia, Dasypodidae). Mamm. Biol. 75, 326-333 (2010).
Tolypeutes_matacus	Galliari, F. C., Carlini, A. A. & Sánchez-Villagra, M. R. (2010). Evolution of the axial skeleton in armadillos (Mammalia, Dasypodidae). Mamm. Biol. 75, 326-333 (2010).
Priodontes_maximus	Galliari, F. C., Carlini, A. A. & Sánchez-Villagra, M. R. (2010). Evolution of the axial skeleton in armadillos (Mammalia, Dasypodidae). Mamm. Biol. 75, 326-333 (2010).
Cabassous_unicinctus	Hayssen, V. Cabassous unicinctus (Cingulata: Dasypodidae). Mamm. Spec. 907, 16-23 (2014).
Tamandua_tetradactyla	Williams, S. A., Spear, J. K., Petrullo, L., Goldstein, D. M., Lee, A. B., Peterson, A. L., Miano, D. A., Kaczmarek, E. B. & Shattuck, M. R. Increased variation in numbers of presacral vertebrae in suspensory mammals. Nat. Ecol. Evol. 3, 949–956 (2019).
Tamandua_mexicana	Williams, S. A., Spear, J. K., Petrullo, L., Goldstein, D. M., Lee, A. B., Peterson, A. L., Miano, D. A., Kaczmarek, E. B. & Shattuck, M. R. Increased variation in numbers of presacral vertebrae in suspensory mammals. Nat. Ecol. Evol. 3, 949–956 (2019).
Myrmecophaga_tridactyla	Williams, S. A., Spear, J. K., Petrullo, L., Goldstein, D. M., Lee, A. B., Peterson, A. L., Miano, D. A., Kaczmarek, E. B. & Shattuck, M. R. Increased variation in numbers of presacral vertebrae in suspensory mammals. Nat. Ecol. Evol. 3, 949–956 (2019).
Cyclopes_didactylus	Williams, S. A., Spear, J. K., Petrullo, L., Goldstein, D. M., Lee, A. B., Peterson, A. L., Miano, D. A., Kaczmarek, E. B. & Shattuck, M. R. Increased variation in numbers of presacral vertebrae in suspensory mammals. Nat. Ecol. Evol. 3, 949–956 (2019).
Choloepus_hoffmanni	Asher, R. J., Lin, K. H., Kardjilov, N. & Hautier, L. Variability and constraint in the mammalian vertebral column. J. Evol. Biol. 24, 1080-1090 (2011).
Choloepus_didactylus	Adam, P. J. Choloepus didactylus. Mamm. Spec. 621, 1-8 (1999).
Bradypus_tridactylus	Williams, S. A., Spear, J. K., Petrullo, L., Goldstein, D. M., Lee, A. B., Peterson, A. L., Miano, D. A., Kaczmarek, E. B. & Shattuck, M. R. Increased variation in numbers of presacral vertebrae in suspensory mammals. Nat. Ecol. Evol. 3, 949–956 (2019).
Bradypus_variegatus	Asher, R. J., Lin, K. H., Kardjilov, N. & Hautier, L. Variability and constraint in the mammalian vertebral column. J. Evol. Biol. 24, 1080-1090 (2011).
Rhyncholestes_raphanurus	Williams, S. A., Spear, J. K., Petrullo, L., Goldstein, D. M., Lee, A. B., Peterson, A. L., Miano, D. A., Kaczmarek, E. B. & Shattuck, M. R. Increased variation in numbers of presacral vertebrae in suspensory mammals. Nat. Ecol. Evol. 3, 949–956 (2019).
Caenolestes_fuliginosus	Sánchez‐Villagra, M. R., Narita, Y. & Kuratani, S. Thoracolumbar vertebral number: the first skeletal synapomorphy for afrotherian mammals. Syst. Biodiv. 5, 1–7 (2007).
Glironia_venusta	Flores, D. A. & DÌaz, M. M. Postcranial skeleton of Glironia venusta (Didelphimorphia, Didelphidae, Caluromyinae): description and functional morphology. Zoosyst. Evol. 85, 311-339 (2009)
Monodelphis_domestica	Pridmore, P. A. Trunk movements during locomotion in the marsupial Monodelphis domestica (Didelphidae). J. Morph. 211, 137-146 (1992).
Gracilinanus_microtarsus	Pires, M. M., Martins, E. G., Silva, M. N. F. & Dos Reis, S. F.. Gracilinanus microtarsus (Didelphimorphia: Didelphidae). Mamm. Spec. 851, 33-40 (2010).
Metachirus_nudicaudatus	Flores, D. A. Phylogenetic analyses of postcranial skeletal morphology in didelphid marsupials. Bull. Amer. Mus. Nat. Hist. 320, 1-81 (2009).
Didelphis_virginiana	Williams, S. A., Spear, J. K., Petrullo, L., Goldstein, D. M., Lee, A. B., Peterson, A. L., Miano, D. A., Kaczmarek, E. B. & Shattuck, M. R. Increased variation in numbers of presacral vertebrae in suspensory mammals. Nat. Ecol. Evol. 3, 949–956 (2019).
Didelphis_marsupialis	Williams, S. A., Spear, J. K., Petrullo, L., Goldstein, D. M., Lee, A. B., Peterson, A. L., Miano, D. A., Kaczmarek, E. B. & Shattuck, M. R. Increased variation in numbers of presacral vertebrae in suspensory mammals. Nat. Ecol. Evol. 3, 949–956 (2019).
Didelphis_albiventris	Inamassu, L. R., Schimming, B. C., Dadalto, C. R. & Mamprim, M. J. Osteology and radiology of the vertebral column in the white‐eared opossum (Didelphis albiventris). Anat. Histol. Embryol. 50, 128-135 (2021)..
Chironectes_minimus	Flores, D. A. Phylogenetic analyses of postcranial skeletal morphology in didelphid marsupials. Bull. Amer. Mus. Nat. Hist. 320, 1-81 (2009).
Caluromys_philander	Williams, S. A., Spear, J. K., Petrullo, L., Goldstein, D. M., Lee, A. B., Peterson, A. L., Miano, D. A., Kaczmarek, E. B. & Shattuck, M. R. Increased variation in numbers of presacral vertebrae in suspensory mammals. Nat. Ecol. Evol. 3, 949–956 (2019).
Dromiciops_gliroides	Williams, S. A., Spear, J. K., Petrullo, L., Goldstein, D. M., Lee, A. B., Peterson, A. L., Miano, D. A., Kaczmarek, E. B. & Shattuck, M. R. Increased variation in numbers of presacral vertebrae in suspensory mammals. Nat. Ecol. Evol. 3, 949–956 (2019).
Notoryctes_typhlops	Warburton, N. M. Functional morphology of marsupial moles (Marsupialia: Notoryctidae). Verhandlungen des Naturwissenschaftlichen Vereins in Hamburg 4, 39-149 (2006).
Notoryctes_caurinus	Warburton, N. M. Functional morphology of marsupial moles (Marsupialia: Notoryctidae). Verhandlungen des Naturwissenschaftlichen Vereins in Hamburg 4, 39-149 (2006).
Macrotis_lagotis	Williams, S. A., Spear, J. K., Petrullo, L., Goldstein, D. M., Lee, A. B., Peterson, A. L., Miano, D. A., Kaczmarek, E. B. & Shattuck, M. R. Increased variation in numbers of presacral vertebrae in suspensory mammals. Nat. Ecol. Evol. 3, 949–956 (2019).
Isoodon_macrourus	Hautier, L., Weisbecker, V., Sánchez-Villagra, M. R., Goswami, A. & Asher, R. J. Skeletal development in sloths and the evolution of mammalian vertebral patterning. Proc. Natl. Acad. Sci. USA 107, 18903–18908 (2010).
Isoodon_obesulus	Hautier, L., Weisbecker, V., Sánchez-Villagra, M. R., Goswami, A. & Asher, R. J. Skeletal development in sloths and the evolution of mammalian vertebral patterning. Proc. Natl. Acad. Sci. USA 107, 18903–18908 (2010).
Perameles_gunnii	Seebeck, J. H. Perameles gunnii. Mamm. Spec. 654, 1-8 (2001).
Perameles_nasuta	Narita, Y. & Kuratani, S. Evolution of the vertebral formulae in mammals: a perspective on developmental constraints. J. Exper. Zool. B: Mol. Dev. Evol. 304, 91–106 (2005).
Sarcophilus_harrisii	Williams, S. A., Spear, J. K., Petrullo, L., Goldstein, D. M., Lee, A. B., Peterson, A. L., Miano, D. A., Kaczmarek, E. B. & Shattuck, M. R. Increased variation in numbers of presacral vertebrae in suspensory mammals. Nat. Ecol. Evol. 3, 949–956 (2019).
Dasyurus_maculatus	Hautier, L., Weisbecker, V., Sánchez-Villagra, M. R., Goswami, A. & Asher, R. J. Skeletal development in sloths and the evolution of mammalian vertebral patterning. Proc. Natl. Acad. Sci. USA 107, 18903–18908 (2010).
Dasyurus_viverrinus	Williams, S. A., Spear, J. K., Petrullo, L., Goldstein, D. M., Lee, A. B., Peterson, A. L., Miano, D. A., Kaczmarek, E. B. & Shattuck, M. R. Increased variation in numbers of presacral vertebrae in suspensory mammals. Nat. Ecol. Evol. 3, 949–956 (2019).
Dasyuroides_byrnei	Sánchez‐Villagra, M. R., Narita, Y. & Kuratani, S. Thoracolumbar vertebral number: the first skeletal synapomorphy for afrotherian mammals. Syst. Biodiv. 5, 1–7 (2007).
Dasycercus_cristicauda	Sánchez‐Villagra, M. R., Narita, Y. & Kuratani, S. Thoracolumbar vertebral number: the first skeletal synapomorphy for afrotherian mammals. Syst. Biodiv. 5, 1–7 (2007).
Antechinus_flavipes	Narita, Y. & Kuratani, S. Evolution of the vertebral formulae in mammals: a perspective on developmental constraints. J. Exper. Zool. B: Mol. Dev. Evol. 304, 91–106 (2005).
Thylacinus_cynocephalus	Narita, Y. & Kuratani, S. Evolution of the vertebral formulae in mammals: a perspective on developmental constraints. J. Exper. Zool. B: Mol. Dev. Evol. 304, 91–106 (2005).
Myrmecobius_fasciatus	Narita, Y. & Kuratani, S. Evolution of the vertebral formulae in mammals: a perspective on developmental constraints. J. Exper. Zool. B: Mol. Dev. Evol. 304, 91–106 (2005).
Phascolarctos_cinereus	Williams, S. A., Spear, J. K., Petrullo, L., Goldstein, D. M., Lee, A. B., Peterson, A. L., Miano, D. A., Kaczmarek, E. B. & Shattuck, M. R. Increased variation in numbers of presacral vertebrae in suspensory mammals. Nat. Ecol. Evol. 3, 949–956 (2019).
Vombatus_ursinus	Williams, S. A., Spear, J. K., Petrullo, L., Goldstein, D. M., Lee, A. B., Peterson, A. L., Miano, D. A., Kaczmarek, E. B. & Shattuck, M. R. Increased variation in numbers of presacral vertebrae in suspensory mammals. Nat. Ecol. Evol. 3, 949–956 (2019).
Lasiorhinus_latifrons	Chen, X., Milne, N. & O'Higgins, P. Morphological variation of the thoracolumbar vertebrae in Macropodidae and its functional relevance. J. Morphol. 266, 167-181 (2005).
Cercartetus_concinnus	Hautier, L., Weisbecker, V., Sánchez-Villagra, M. R., Goswami, A. & Asher, R. J. Skeletal development in sloths and the evolution of mammalian vertebral patterning. Proc. Natl. Acad. Sci. USA 107, 18903–18908 (2010).
Trichosurus_vulpecula	Asher, R. J., Lin, K. H., Kardjilov, N. & Hautier, L. Variability and constraint in the mammalian vertebral column. J. Evol. Biol. 24, 1080-1090 (2011).
Spilocuscus_maculatus	Chen, X., Milne, N. & O'Higgins, P. Morphological variation of the thoracolumbar vertebrae in Macropodidae and its functional relevance. J. Morphol. 266, 167-181 (2005).
Phalanger_sericeus	Sánchez‐Villagra, M. R., Narita, Y. & Kuratani, S. Thoracolumbar vertebral number: the first skeletal synapomorphy for afrotherian mammals. Syst. Biodiv. 5, 1–7 (2007).
Phalanger_orientalis	Sánchez‐Villagra, M. R., Narita, Y. & Kuratani, S. Thoracolumbar vertebral number: the first skeletal synapomorphy for afrotherian mammals. Syst. Biodiv. 5, 1–7 (2007).
Hypsiprymnodon_moschatus	Chen, X., Milne, N. & O'Higgins, P. Morphological variation of the thoracolumbar vertebrae in Macropodidae and its functional relevance. J. Morphol. 266, 167-181 (2005).
Thylogale_billardierii	Sánchez‐Villagra, M. R., Narita, Y. & Kuratani, S. Thoracolumbar vertebral number: the first skeletal synapomorphy for afrotherian mammals. Syst. Biodiv. 5, 1–7 (2007).
Petrogale_lateralis	Chen, X., Milne, N. & O'Higgins, P. Morphological variation of the thoracolumbar vertebrae in Macropodidae and its functional relevance. J. Morphol. 266, 167-181 (2005).
Petrogale_penicillata	Sánchez‐Villagra, M. R., Narita, Y. & Kuratani, S. Thoracolumbar vertebral number: the first skeletal synapomorphy for afrotherian mammals. Syst. Biodiv. 5, 1–7 (2007).
Dendrolagus_goodfellowi	Williams, S. A., Spear, J. K., Petrullo, L., Goldstein, D. M., Lee, A. B., Peterson, A. L., Miano, D. A., Kaczmarek, E. B. & Shattuck, M. R. Increased variation in numbers of presacral vertebrae in suspensory mammals. Nat. Ecol. Evol. 3, 949–956 (2019).
Dendrolagus_matschiei	Williams, S. A., Spear, J. K., Petrullo, L., Goldstein, D. M., Lee, A. B., Peterson, A. L., Miano, D. A., Kaczmarek, E. B. & Shattuck, M. R. Increased variation in numbers of presacral vertebrae in suspensory mammals. Nat. Ecol. Evol. 3, 949–956 (2019).
Dendrolagus_bennettianus	Chen, X., Milne, N. & O'Higgins, P. Morphological variation of the thoracolumbar vertebrae in Macropodidae and its functional relevance. J. Morphol. 266, 167-181 (2005).
Dendrolagus_lumholtzi	Williams, S. A., Spear, J. K., Petrullo, L., Goldstein, D. M., Lee, A. B., Peterson, A. L., Miano, D. A., Kaczmarek, E. B. & Shattuck, M. R. Increased variation in numbers of presacral vertebrae in suspensory mammals. Nat. Ecol. Evol. 3, 949–956 (2019).
Macropus_fuliginosus	Williams, S. A., Spear, J. K., Petrullo, L., Goldstein, D. M., Lee, A. B., Peterson, A. L., Miano, D. A., Kaczmarek, E. B. & Shattuck, M. R. Increased variation in numbers of presacral vertebrae in suspensory mammals. Nat. Ecol. Evol. 3, 949–956 (2019).
Macropus_giganteus	Williams, S. A., Spear, J. K., Petrullo, L., Goldstein, D. M., Lee, A. B., Peterson, A. L., Miano, D. A., Kaczmarek, E. B. & Shattuck, M. R. Increased variation in numbers of presacral vertebrae in suspensory mammals. Nat. Ecol. Evol. 3, 949–956 (2019).
Macropus_antilopinus	Chen, X., Milne, N. & O'Higgins, P. Morphological variation of the thoracolumbar vertebrae in Macropodidae and its functional relevance. J. Morphol. 266, 167-181 (2005).
Macropus_robustus	Williams, S. A., Spear, J. K., Petrullo, L., Goldstein, D. M., Lee, A. B., Peterson, A. L., Miano, D. A., Kaczmarek, E. B. & Shattuck, M. R. Increased variation in numbers of presacral vertebrae in suspensory mammals. Nat. Ecol. Evol. 3, 949–956 (2019).
Macropus_rufus	Williams, S. A., Spear, J. K., Petrullo, L., Goldstein, D. M., Lee, A. B., Peterson, A. L., Miano, D. A., Kaczmarek, E. B. & Shattuck, M. R. Increased variation in numbers of presacral vertebrae in suspensory mammals. Nat. Ecol. Evol. 3, 949–956 (2019).
Macropus_rufogriseus	Williams, S. A., Spear, J. K., Petrullo, L., Goldstein, D. M., Lee, A. B., Peterson, A. L., Miano, D. A., Kaczmarek, E. B. & Shattuck, M. R. Increased variation in numbers of presacral vertebrae in suspensory mammals. Nat. Ecol. Evol. 3, 949–956 (2019).
Macropus_eugenii	Williams, S. A., Spear, J. K., Petrullo, L., Goldstein, D. M., Lee, A. B., Peterson, A. L., Miano, D. A., Kaczmarek, E. B. & Shattuck, M. R. Increased variation in numbers of presacral vertebrae in suspensory mammals. Nat. Ecol. Evol. 3, 949–956 (2019).
Macropus_agilis	Williams, S. A., Spear, J. K., Petrullo, L., Goldstein, D. M., Lee, A. B., Peterson, A. L., Miano, D. A., Kaczmarek, E. B. & Shattuck, M. R. Increased variation in numbers of presacral vertebrae in suspensory mammals. Nat. Ecol. Evol. 3, 949–956 (2019).
Macropus_parryi	Williams, S. A., Spear, J. K., Petrullo, L., Goldstein, D. M., Lee, A. B., Peterson, A. L., Miano, D. A., Kaczmarek, E. B. & Shattuck, M. R. Increased variation in numbers of presacral vertebrae in suspensory mammals. Nat. Ecol. Evol. 3, 949–956 (2019).
Macropus_parma	Kawashima, T., Thorington Jr, R. W., Bohaska, P. W. & Sato, F. Variability and constraint of vertebral formulae and proportions in colugos, tree shrews, and rodents, with special reference to vertebral modification by aerodynamic adaptation. Folia Morphol. 77, 44-56 (2018).
Macropus_irma	Williams, S. A., Spear, J. K., Petrullo, L., Goldstein, D. M., Lee, A. B., Peterson, A. L., Miano, D. A., Kaczmarek, E. B. & Shattuck, M. R. Increased variation in numbers of presacral vertebrae in suspensory mammals. Nat. Ecol. Evol. 3, 949–956 (2019).
Dendrolagus_ursinus	Williams, S. A., Spear, J. K., Petrullo, L., Goldstein, D. M., Lee, A. B., Peterson, A. L., Miano, D. A., Kaczmarek, E. B. & Shattuck, M. R. Increased variation in numbers of presacral vertebrae in suspensory mammals. Nat. Ecol. Evol. 3, 949–956 (2019).
Potorous_longipes	Chen, X., Milne, N. & O'Higgins, P. Morphological variation of the thoracolumbar vertebrae in Macropodidae and its functional relevance. J. Morphol. 266, 167-181 (2005).
Potorous_tridactylus	Chen, X., Milne, N. & O'Higgins, P. Morphological variation of the thoracolumbar vertebrae in Macropodidae and its functional relevance. J. Morphol. 266, 167-181 (2005).
Bettongia_penicillata	Williams, S. A., Spear, J. K., Petrullo, L., Goldstein, D. M., Lee, A. B., Peterson, A. L., Miano, D. A., Kaczmarek, E. B. & Shattuck, M. R. Increased variation in numbers of presacral vertebrae in suspensory mammals. Nat. Ecol. Evol. 3, 949–956 (2019).
Bettongia_gaimardi	Williams, S. A., Spear, J. K., Petrullo, L., Goldstein, D. M., Lee, A. B., Peterson, A. L., Miano, D. A., Kaczmarek, E. B. & Shattuck, M. R. Increased variation in numbers of presacral vertebrae in suspensory mammals. Nat. Ecol. Evol. 3, 949–956 (2019).
Aepyprymnus_rufescens	Chen, X., Milne, N. & O'Higgins, P. Morphological variation of the thoracolumbar vertebrae in Macropodidae and its functional relevance. J. Morphol. 266, 167-181 (2005).
Pseudocheirus_peregrinus	Sánchez‐Villagra, M. R., Narita, Y. & Kuratani, S. Thoracolumbar vertebral number: the first skeletal synapomorphy for afrotherian mammals. Syst. Biodiv. 5, 1–7 (2007).
Petauroides_volans	Sánchez‐Villagra, M. R., Narita, Y. & Kuratani, S. Thoracolumbar vertebral number: the first skeletal synapomorphy for afrotherian mammals. Syst. Biodiv. 5, 1–7 (2007).
Petaurus_australis	Sánchez‐Villagra, M. R., Narita, Y. & Kuratani, S. Thoracolumbar vertebral number: the first skeletal synapomorphy for afrotherian mammals. Syst. Biodiv. 5, 1–7 (2007).
Petaurus_norfolcensis	https://www.abc.net.au/radionational/programs/offtrack/squirrel-glider/6777846
Petaurus_breviceps	Kawashima, T., Thorington Jr, R. W., Bohaska, P. W. & Sato, F. Variability and constraint of vertebral formulae and proportions in colugos, tree shrews, and rodents, with special reference to vertebral modification by aerodynamic adaptation. Folia Morphol. 77, 44-56 (2018).
